# Supplementary material for: Multidrug-Resistance Related Long Non-Coding RNA Expression Profile Analysis of Gastric Cancer
Source: PLOS journal article supplement (doi:10.1371/journal.pone.0135461), 2015-08-20
Supplement: S5 (10.1371/journal.pone.0135461.s005) [file journal.pone.0135461.s005]

## Sheet: down-BP
#Column "GO.ID" stands for the ID of gene ontology term
#Column "Term" stands for the name of gene ontology term
#Column "Ontology" stands for the ontology of GOID belongs to
#Column "Count" stands for the number of DE genes associated with the listed GOID
#Column "Pop.Hits" stands for the number of background population genes associated with the listed GOID
#Column "List.Total" stands for the total number of DE genes
#Column "Pop.Total" stands for the total number of background population genes
#Column "Fold.Enrichment" stands for the Fold Enrichment value of the GOID, it equals (Count/Pop.Hits)/(List.Total/Pop.Total)
#Column "Pvalue" stands for the significance testing value of the GOID
#Column "FDR" stands for the false discovery rate of the GOID, using Benjamini & Hochberg (1995) method
#Column "Enrichment.Score" stands for the Enrichment Score value of the GOID, it equals (-log10(Pvalue))
#Column "GENES" stands for the DE genes associated with the GOID
GO.ID	Term	Ontology	Count	Pop.Hits	List.Total	Pop.Total	Fold.Enrichment	Pvalue	FDR	Enrichment.Score	GENES
GO:0016126	sterol biosynthetic process	Biological process	10	49	467	14742	6.44234	2.5052e-06	0.0106771	5.60116	CYP51A1//DHCR7//HMGCS1//INSIG1//LSS//MVD//TM7SF2//NSDHL//PRKAA1//PRKAG2
GO:0006695	cholesterol biosynthetic process	Biological process	9	43	467	14742	6.60714	6.42892e-06	0.0137	5.19186	DHCR7//PRKAA1//CYP51A1//HMGCS1//INSIG1//LSS//MVD//TM7SF2//NSDHL
GO:0050896	response to stimulus	Biological process	252	6691	467	14742	1.18891	9.75292e-05	0.138557	4.01087	MAP4K1//GHR//PRKAA1//MAPK10//NOD1//ERCC6//GTF2H1//ASL//HMGCS1//CCK//ALDH3A1//RYR1//HIF3A//CLEC7A//PXDN//CNTFR//PELI2//PELI1//IL6R//TNFSF13//ALOX5//S100A9//TNFSF13B//TAC1//HSP90AA1//HSPB7//YOD1//HERPUD2//CSF3R//CD83//ITIH4//DEFB123//CDK6//EEF1G//SIVA1//CD2//EGF//F13B//GATA4//INPP5D//KIF2A//LAMP2//PDE1A//THBD//TTN//LRP8//RCOR1//PIK3R5//CELSR2//NDRG2//EGFR//GNG11//GRB10//GRIA1//IL2RB//NRGN//OR1F1//P…
GO:0032501	multicellular organismal process	Biological process	202	5201	467	14742	1.22604	0.000178383	0.13908	3.74865	ETS2//TP63//RUNX2//COL13A1//EGFR//STC1//TWIST1//CASP8//TYMP//EGF//SRPK2//NRXN3//PDCD10//DICER1//RASIP1//OVOL2//CTNNA1//BMP15//TRIP13//FBXO5//DHCR7//LAMA4//NRP1//SEMA5A//RBM15//ZFP36L1//HIPK2//SRD5A1//GLI3//CCK//NMU//GATA4//RARRES2//HES3//PCDH8//DCX//CELSR2//CDKL5//SFTPD//NDRG2//PELI1//ALDH1A3//ASL//DCN//ARID5B//ZBTB16//SKIL//INTS1//DEAF1//HMGCS1//PRDM1//NSDHL//FZD10//BBS5//TGM2//CSRP3//SEMA3A//RO…
GO:0035338	long-chain fatty-acyl-CoA biosynthetic process	Biological process	5	18	467	14742	8.76874	0.000190042	0.13908	3.72115	ACSL1//ACSL3//ACSL6//HSD17B12//ELOVL3
GO:0032502	developmental process	Biological process	165	4104	467	14742	1.26916	0.000197674	0.13908	3.70405	EGFR//ETS2//TP63//CASP8//TYMP//EGF//SRPK2//NRXN3//PDCD10//DICER1//RASIP1//OVOL2//CTNNA1//BMP15//TRIP13//FBXO5//DHCR7//LAMA4//NRP1//SEMA5A//RBM15//ZFP36L1//RUNX2//HIPK2//SRD5A1//GLI3//GATA4//RARRES2//TWIST1//HES3//PCDH8//COL13A1//CCK//DCX//CELSR2//CDKL5//ALDH1A3//ASL//DCN//ARID5B//ZBTB16//SKIL//INTS1//DEAF1//TNMD//HMGCS1//PRDM1//NSDHL//FZD10//BBS5//ROBO1//FST//RYR1//SLC40A1//CPE//CDK6//CNTFR//ACRV…
GO:0042221	response to chemical stimulus	Biological process	113	2641	467	14742	1.35067	0.000318984	0.13908	3.49623	ERCC6//ASL//HMGCS1//ALDH3A1//PRKAA1//RYR1//HIF3A//PXDN//CLEC7A//IL6R//HSP90AA1//HSPB7//YOD1//HERPUD2//KCNIP1//NAT1//ADH6//CYP51A1//AKR1C1//FMO3//PTGS2//SULT1E1//ACSS2//TYMP//S100A9//CCL13//COL6A2//DCX//EGFR//GAS1//GLI3//PLXNB1//ROBO1//NCK2//NUMB//NRP1//WASL//SEMA5A//NRXN3//PLXNC1//SEMA3A//EVL//CNTN4//ALOX5//ENSA//ACSL3//STC1//TAS2R8//CHN1//KIF5C//GRB10//APPL1//PRKAG2//MDM2//PDE1A//PPP2CB//MAPKAP1…
GO:0035336	long-chain fatty-acyl-CoA metabolic process	Biological process	5	20	467	14742	7.89186	0.000326326	0.13908	3.48635	ACSL1//ACSL3//ACSL6//HSD17B12//ELOVL3
GO:0046949	fatty-acyl-CoA biosynthetic process	Biological process	5	20	467	14742	7.89186	0.000326326	0.13908	3.48635	ACSL1//ACSL3//ACSL6//HSD17B12//ELOVL3
GO:0071320	cellular response to cAMP	Biological process	5	20	467	14742	7.89186	0.000326326	0.13908	3.48635	AQP1//AQP9//ASL//SRD5A1//STC1
GO:0035384	thioester biosynthetic process	Biological process	5	21	467	14742	7.51606	0.000417237	0.148189	3.37962	ACSL1//ACSL3//ACSL6//HSD17B12//ELOVL3
GO:0071616	acyl-CoA biosynthetic process	Biological process	5	21	467	14742	7.51606	0.000417237	0.148189	3.37962	ACSL1//ACSL3//ACSL6//HSD17B12//ELOVL3
GO:0035337	fatty-acyl-CoA metabolic process	Biological process	5	22	467	14742	7.17442	0.000526015	0.151195	3.279	ACSL1//ACSL3//ACSL6//HSD17B12//ELOVL3
GO:0051716	cellular response to stimulus	Biological process	184	4754	467	14742	1.22179	0.000552831	0.151195	3.25741	MAP4K1//GHR//PRKAA1//MAPK10//NOD1//GTF2H1//PXDN//CLEC7A//PELI2//PELI1//IL6R//CELSR2//NDRG2//CCK//CNTFR//CSF3R//EGF//EGFR//GNG11//GRB10//GRIA1//HSP90AA1//IL2RB//INPP5D//NRGN//OR1F1//PDE1A//PDE4D//PLXNB1//PPIC//PPP2R5C//PTPRK//RIT2//S100A9//CCL13//LRP8//OR1E2//NCK2//TNFSF13//TNFRSF10A//NRP1//KALRN//CDKL2//SEMA5A//CD83//AKAP9//PLXNC1//FST//TNFSF13B//NMU//FGL2//ICK//PLCB1//APPL1//KCNIP1//CNGB3//RASIP…
GO:0009605	response to external stimulus	Biological process	59	1209	467	14742	1.54051	0.000553081	0.151195	3.25721	CLEC7A//IL6R//TAC1//TYMP//S100A9//CCL13//DCN//TRPV4//COL6A2//DCX//EGFR//GAS1//GLI3//HSP90AA1//PLXNB1//ROBO1//NCK2//NUMB//NRP1//WASL//SEMA5A//NRXN3//PLXNC1//SEMA3A//EVL//CNTN4//ALDH3A1//ALOX5//ASL//ENSA//ACSL3//STC1//OPN5//RP1//CHN1//KIF5C//SRD5A1//PER1//THBD//RARRES2//NOD1//AQP1//CASP8//TNFRSF10A//SERPINE2//PTGS2//PRKAA1//GHR//PYY//CCK//GATA4//MEST//HMGCS1//SFTPD//KLK8//NT5E//TGM2//LXN//FZD10
GO:0007165	signal transduction	Biological process	156	3923	467	14742	1.2553	0.000567601	0.151195	3.24596	MAP4K1//GHR//PRKAA1//MAPK10//NOD1//PXDN//CLEC7A//PELI2//PELI1//CELSR2//NDRG2//EGFR//ROR1//PILRB//DCX//INPP5D//PLXNB1//RP1//KALRN//TLK2//UNC13A//PLCB1//TNS3//STAC2//EGF//ERRFI1//MDM2//PPP2R5C//PSMA3//TP63//HIPK2//CD2//STC1//EVL//NPPA//NCK2//PDE1A//ERBB2IP//MAPKAP1//RICTOR//PTPRK//AKR1C2//MS4A2//GNG11//GPR18//PYY//PTGDR//NMU//NPFFR2//GPR128//MTNR1B//GNG13//CCK//GABRB2//HOMER2//TAC1//CPE//NXPH2//GMD…
GO:0007275	multicellular organismal development	Biological process	147	3675	467	14742	1.2627	0.000692206	0.16479	3.15976	ETS2//TP63//CASP8//TYMP//EGF//SRPK2//NRXN3//PDCD10//DICER1//RASIP1//OVOL2//CTNNA1//BMP15//DHCR7//LAMA4//NRP1//SEMA5A//RBM15//ZFP36L1//HIPK2//SRD5A1//GLI3//GATA4//RARRES2//TWIST1//HES3//PCDH8//CCK//DCX//CELSR2//CDKL5//ALDH1A3//ASL//DCN//ARID5B//ZBTB16//SKIL//INTS1//DEAF1//HMGCS1//PRDM1//EGFR//NSDHL//FZD10//BBS5//COL13A1//ROBO1//FST//RYR1//CPE//CDK6//THBD//RICTOR//CFC1B//CUL1//EVL//CHN1//CNTFR//KIF…
GO:0048731	system development	Biological process	127	3095	467	14742	1.29534	0.000695968	0.16479	3.15741	ETS2//TP63//CASP8//TYMP//EGF//SRPK2//NRXN3//PDCD10//DICER1//RASIP1//OVOL2//CTNNA1//BMP15//DHCR7//LAMA4//NRP1//SEMA5A//RBM15//ZFP36L1//HIPK2//SRD5A1//GLI3//CCK//DCX//CELSR2//CDKL5//TWIST1//ALDH1A3//ASL//DCN//ARID5B//ZBTB16//DEAF1//HMGCS1//PRDM1//EGFR//NSDHL//FZD10//GATA4//BBS5//COL13A1//ROBO1//FST//RYR1//CPE//CDK6//CUL1//EVL//CHN1//CNTFR//KIF2A//NAIP//NRGN//SERPINE2//TCF12//NUMB//KALRN//SEMA3A//OL…
GO:0008283	cell proliferation	Biological process	66	1407	467	14742	1.48078	0.00074087	0.166189	3.13026	INTS1//TNMD//NRP1//GLI3//GAS1//TP63//ACSL6//CTNNA1//ALDH3A1//CCK//CNTFR//AKR1C2//EGF//EGFR//IL6R//MDM2//MVD//TSPAN31//SRPK2//TNFSF13//TSC22D1//TNFSF13B//PDCD10//HIPK2//TNS3//CDK6//INPP5D//PPP2R5C//PTGS2//PTPRK//ROBO1//UMOD//ZBTB16//NCK2//CUL1//MYO16//OVOL2//DICER1//NUMB//IKZF3//PRDM1//TNFRSF4//PELI1//DEAF1//PLXNB1//DHCR7//SFTPD//KLK8//AQP1//NOTCH3//TGM2//NDRG2//TAC1//MAGED1//GATA4//TWIST1//CBFA2T…
GO:0048856	anatomical structure development	Biological process	141	3510	467	14742	1.26809	0.000785847	0.167464	3.10466	EGFR//ETS2//TP63//CASP8//TYMP//EGF//SRPK2//NRXN3//PDCD10//DICER1//RASIP1//OVOL2//CTNNA1//BMP15//TRIP13//FBXO5//DHCR7//LAMA4//NRP1//SEMA5A//RBM15//ZFP36L1//HIPK2//SRD5A1//GLI3//GATA4//PCDH8//COL13A1//CCK//DCX//CELSR2//CDKL5//TWIST1//ALDH1A3//ASL//DCN//ARID5B//ZBTB16//SKIL//INTS1//DEAF1//TNMD//HMGCS1//PRDM1//NSDHL//FZD10//BBS5//ROBO1//FST//RYR1//SLC40A1//CPE//CDK6//CNTFR//SPAG6//CFC1B//CUL1//EVL//E…
GO:0030154	cell differentiation	Biological process	102	2408	467	14742	1.33716	0.00096596	0.188929	3.01504	TRIP13//FBXO5//ZFP36L1//RASIP1//RUNX2//OVOL2//CCK//DCX//CELSR2//CDKL5//TWIST1//TNMD//GLI3//TP63//FST//CDK6//PRDM1//DEAF1//SPAG6//ACSL6//CTNNA1//CNTN4//COL6A2//EGFR//GAS1//HSP90AA1//PLXNB1//ROBO1//NCK2//NUMB//NRP1//WASL//SEMA5A//NRXN3//PLXNC1//SEMA3A//EVL//UCHL1//IFRD1//CHN1//KIF5C//DICER1//TRPV4//ZBTB16//TET2//FZD10//HIPK2//SPRR3//RCOR1//CASP8//TTN//CBFA2T3//EFHD1//RP1//BOC//CD83//HLA-DMA//DLG2//…
GO:0042981	regulation of apoptotic process	Biological process	56	1161	467	14742	1.52263	0.00101283	0.188929	2.99447	NAIP//TP63//BNIP3L//CD2//TGM2//TPD52L1//TNFRSF10A//FEM1B//NOD1//SIVA1//SLAMF7//CASP8//IFI27//RASGRF2//KALRN//MAGED1//CUL1//HIPK2//ERCC6//CADM1//PPP2R5C//ALDH1A3//CCK//INPP5D//PTGS2//ZBTB16//TSC22D1//AQP1//CTNNA1//DPEP1//EGFR//GLI3//MDM2//PPP2CB//PRKAA1//PDCD10//DICER1//INTS1//CNTFR//SRPK2//GHR//GRIK5//SERBP1//IL6R//TNFRSF4//IL2RB//TNFSF13B//GAS1//LCN2//PSMA3//SKIL//IKZF3//APPL1//BCL2L14//CARD6//R…
GO:0001944	vasculature development	Biological process	28	469	467	14742	1.88462	0.00101956	0.188929	2.99159	CASP8//TYMP//EGF//SRPK2//NRXN3//PDCD10//DICER1//RASIP1//OVOL2//DHCR7//LAMA4//NRP1//SEMA5A//RBM15//ZFP36L1//ROBO1//TNMD//AQP1//GATA4//TWIST1//HIPK2//ERRFI1//FBXW8//NSDHL//GLI3//NOTCH3//PTGS2//FZD10
GO:0006915	apoptotic process	Biological process	69	1509	467	14742	1.44344	0.00110471	0.196179	2.95675	CCK//TPD52L1//NAIP//TP63//BNIP3L//CD2//TGM2//TNFRSF10A//FEM1B//NOD1//SIVA1//CASP8//IFI27//ROBO1//DNM1L//DBNL//SLAMF7//RASGRF2//KALRN//MAGED1//CUL1//HIPK2//ERCC6//GAS1//IL6R//LCN2//PSMA3//SKIL//TNFRSF4//IKZF3//APPL1//BCL2L14//CARD6//RASSF6//PPP2R5C//ALDH1A3//INPP5D//PTGS2//ZBTB16//TSC22D1//AQP1//CTNNA1//DPEP1//EGFR//GLI3//MDM2//PPP2CB//PRKAA1//PDCD10//DICER1//INTS1//CNTFR//SRPK2//GHR//GRIK5//IL2RB…
GO:0043067	regulation of programmed cell death	Biological process	56	1170	467	14742	1.51092	0.00121055	0.206374	2.91702	NAIP//TP63//BNIP3L//CD2//TGM2//TPD52L1//TNFRSF10A//FEM1B//NOD1//SIVA1//SLAMF7//CASP8//IFI27//RASGRF2//KALRN//MAGED1//CUL1//HIPK2//ERCC6//GAS1//IL6R//LCN2//PSMA3//SKIL//TNFRSF4//IKZF3//APPL1//BCL2L14//CARD6//RASSF6//CADM1//PPP2R5C//ALDH1A3//CCK//INPP5D//PTGS2//ZBTB16//TSC22D1//AQP1//CTNNA1//DPEP1//EGFR//GLI3//MDM2//PPP2CB//PRKAA1//PDCD10//DICER1//INTS1//CNTFR//SRPK2//GHR//GRIK5//SERBP1//IL2RB//TNF…
GO:0051591	response to cAMP	Biological process	8	68	467	14742	3.71382	0.0013335	0.206829	2.87501	AQP1//AQP9//ASL//SRD5A1//STC1//ALDH3A1//IL6R//THBD
GO:0050871	positive regulation of B cell activation	Biological process	7	53	467	14742	4.16929	0.0013374	0.206829	2.87374	TNFRSF4//TNFSF13B//PELI1//PRDM1//INPP5D//PAXIP1//TNFSF13
GO:0012501	programmed cell death	Biological process	69	1521	467	14742	1.43205	0.0013588	0.206829	2.86684	CCK//CASP8//PSMA3//RASGRF2//TWIST1//ZBTB16//FXR1//CUL1//TP63//KALRN//MAGED1//DNM1L//SEMA3A//NOD1//SIVA1//PEG10//CADM1//APPL1//DBNL//HIPK2//SLC40A1//BCAP29//AKTIP//BCL2L14//RNF34//CLPTM1L//TPD52L1//NAIP//BNIP3L//CD2//TGM2//TNFRSF10A//FEM1B//IFI27//ROBO1//SLAMF7//ERCC6//GAS1//IL6R//LCN2//SKIL//TNFRSF4//IKZF3//CARD6//RASSF6//PPP2R5C//ALDH1A3//INPP5D//PTGS2//TSC22D1//AQP1//CTNNA1//DPEP1//EGFR//GLI3//…
GO:0006694	steroid biosynthetic process	Biological process	12	138	467	14742	2.745	0.00146293	0.215	2.83478	CYP51A1//DHCR7//HMGCS1//INSIG1//LSS//MVD//TM7SF2//NSDHL//SRD5A1//PRKAG2//PRKAA1//HSD17B12
GO:0001890	placenta development	Biological process	10	103	467	14742	3.0648	0.00156955	0.220784	2.80422	PRDM1//EGFR//PTGS2//STC1//RBM15//PLK4//FBXW8//NSDHL//OVOL2//DCN
GO:0007154	cell communication	Biological process	172	4490	467	14742	1.20927	0.00160589	0.220784	2.79428	MAP4K1//GHR//PRKAA1//MAPK10//NOD1//PXDN//CLEC7A//PELI2//PELI1//CELSR2//NDRG2//CCK//CNTFR//CSF3R//EGF//EGFR//GNG11//GRB10//GRIA1//HSP90AA1//IL2RB//INPP5D//NRGN//OR1F1//PDE1A//PDE4D//PLXNB1//PPIC//PPP2R5C//PTPRK//RIT2//S100A9//CCL13//LRP8//OR1E2//NCK2//TNFSF13//TNFRSF10A//NRP1//KALRN//CDKL2//SEMA5A//CD83//AKAP9//PLXNC1//FST//TNFSF13B//NMU//FGL2//ICK//PLCB1//APPL1//KCNIP1//CNGB3//RASIP1//ERBB2IP//AR…
GO:0007166	cell surface receptor signaling pathway	Biological process	92	2166	467	14742	1.34082	0.001666	0.22189	2.77832	PXDN//CLEC7A//CELSR2//PRKAA1//NDRG2//EGFR//ROR1//PILRB//EGF//ERRFI1//NPPA//MDM2//PDE1A//NCK2//ERBB2IP//MAPKAP1//RICTOR//PTPRK//AKR1C2//MS4A2//GNG11//GPR18//PYY//PTGDR//NMU//NPFFR2//GPR128//MTNR1B//GNG13//CCK//PLCB1//GABRB2//HOMER2//TAC1//CPE//NXPH2//GMDS//NOTCH3//RBM15//GLI3//HIPK2//NSDHL//ADAM11//ADAM33//MAPK10//NOD1//PELI2//PELI1//GRB10//APPL1//PRKAG2//PPP2CB//GAS1//KLK14//HLA-DMA//IFI27//IL2RB…
GO:0023052	signaling	Biological process	168	4383	467	14742	1.20998	0.00184286	0.230843	2.73451	MAP4K1//GHR//PRKAA1//MAPK10//NOD1//PXDN//CLEC7A//PELI2//PELI1//CELSR2//NDRG2//CCK//CNTFR//CSF3R//EGF//EGFR//GNG11//GRB10//GRIA1//HSP90AA1//IL2RB//INPP5D//NRGN//OR1F1//PDE1A//PDE4D//PLXNB1//PPIC//PPP2R5C//PTPRK//RIT2//S100A9//CCL13//LRP8//OR1E2//NCK2//TNFSF13//TNFRSF10A//NRP1//KALRN//CDKL2//SEMA5A//CD83//AKAP9//PLXNC1//FST//TNFSF13B//NMU//FGL2//ICK//PLCB1//APPL1//KCNIP1//CNGB3//RASIP1//ERBB2IP//AR…
GO:0021987	cerebral cortex development	Biological process	7	56	467	14742	3.94593	0.00185502	0.230843	2.73165	EGFR//GLI3//LRP8//ROBO1//SRD5A1//PLCB1//DICER1
GO:0042127	regulation of cell proliferation	Biological process	51	1063	467	14742	1.51452	0.00191135	0.230843	2.71866	TNMD//NRP1//GLI3//GAS1//TP63//CTNNA1//ALDH3A1//CCK//CNTFR//AKR1C2//EGF//EGFR//IL6R//MDM2//MVD//TSPAN31//SRPK2//TNFSF13//TSC22D1//TNFSF13B//PDCD10//HIPK2//TNS3//CDK6//INPP5D//PPP2R5C//PTGS2//PTPRK//ROBO1//UMOD//ZBTB16//NCK2//CUL1//MYO16//OVOL2//DICER1//IKZF3//PRDM1//TNFRSF4//PELI1//DEAF1//PLXNB1//SFTPD//AQP1//NOTCH3//TGM2//NDRG2//TAC1//MAGED1//GATA4//DHCR7
GO:0071456	cellular response to hypoxia	Biological process	6	42	467	14742	4.50964	0.00194987	0.230843	2.70999	AQP1//ASL//MDM2//STC1//TWIST1//HIPK2
GO:0043406	positive regulation of MAP kinase activity	Biological process	13	163	467	14742	2.51765	0.00206696	0.233758	2.68467	GHR//PRKAA1//MAPK10//NOD1//ERCC6//MAP4K1//DBNL//KIAA1804//FZD10//EGF//EGFR//TPD52L1//PDCD10
GO:0001568	blood vessel development	Biological process	26	446	467	14742	1.84026	0.00212426	0.233758	2.67279	CASP8//TYMP//EGF//SRPK2//NRXN3//PDCD10//DICER1//RASIP1//OVOL2//NRP1//SEMA5A//RBM15//ZFP36L1//ROBO1//TNMD//AQP1//GATA4//TWIST1//HIPK2//FBXW8//NSDHL//GLI3//NOTCH3//PTGS2//DHCR7//LAMA4
GO:0010941	regulation of cell death	Biological process	56	1200	467	14742	1.47315	0.00213904	0.233758	2.66978	NAIP//TP63//BNIP3L//CD2//TGM2//TPD52L1//TNFRSF10A//FEM1B//NOD1//SIVA1//SLAMF7//CASP8//IFI27//RASGRF2//KALRN//MAGED1//CUL1//HIPK2//ERCC6//GAS1//IL6R//LCN2//PSMA3//SKIL//TNFRSF4//IKZF3//APPL1//BCL2L14//CARD6//RASSF6//CADM1//PPP2R5C//ALDH1A3//CCK//INPP5D//PTGS2//ZBTB16//TSC22D1//AQP1//CTNNA1//DPEP1//EGFR//GLI3//MDM2//PPP2CB//PRKAA1//PDCD10//DICER1//INTS1//CNTFR//SRPK2//GHR//GRIK5//SERBP1//IL2RB//TNF…
GO:0048869	cellular developmental process	Biological process	105	2554	467	14742	1.2978	0.00220495	0.234937	2.6566	EGFR//TRIP13//FBXO5//ZFP36L1//RASIP1//RUNX2//OVOL2//CCK//DCX//CELSR2//CDKL5//TWIST1//TNMD//GLI3//TP63//FST//CDK6//PRDM1//DEAF1//SPAG6//ACSL6//CTNNA1//CNTN4//COL6A2//GAS1//HSP90AA1//PLXNB1//ROBO1//NCK2//NUMB//NRP1//WASL//SEMA5A//NRXN3//PLXNC1//SEMA3A//EVL//UCHL1//IFRD1//CHN1//KIF5C//CCL13//WASF3//DICER1//TRPV4//ZBTB16//TET2//ANXA13//CBFA2T3//COL13A1//DHCR7//TYMP//KIF2A//SERPINE2//SRD5A1//SRPK2//TC…
GO:0008219	cell death	Biological process	73	1667	467	14742	1.38238	0.00248994	0.24872	2.60381	CCK//CASP8//PSMA3//RASGRF2//TWIST1//ZBTB16//FXR1//CUL1//TP63//KALRN//MAGED1//DNM1L//SEMA3A//NOD1//SIVA1//PEG10//CADM1//APPL1//DBNL//HIPK2//SLC40A1//BCAP29//AKTIP//BCL2L14//RNF34//CLPTM1L//TPD52L1//NAIP//BNIP3L//CD2//TGM2//TNFRSF10A//FEM1B//IFI27//ROBO1//SLAMF7//GAS1//ERCC6//IL6R//LCN2//SKIL//TNFRSF4//IKZF3//CARD6//RASSF6//PPP2R5C//ALDH1A3//INPP5D//PTGS2//TSC22D1//AQP1//CTNNA1//DPEP1//EGFR//GLI3//…
GO:0002696	positive regulation of leukocyte activation	Biological process	16	228	467	14742	2.21526	0.00252398	0.24872	2.59791	CD2//TNFRSF4//TNFSF13B//PELI1//HLA-DMA//MAPKAP1//RICTOR//NCK2//MS4A2//CD83//PRDM1//INPP5D//PAXIP1//GLI3//TNFSF13//TAC1
GO:0016265	death	Biological process	73	1669	467	14742	1.38072	0.00256767	0.24872	2.59046	CCK//CASP8//PSMA3//RASGRF2//TWIST1//ZBTB16//FXR1//CUL1//TP63//KALRN//MAGED1//DNM1L//SEMA3A//NOD1//SIVA1//PEG10//CADM1//APPL1//DBNL//HIPK2//SLC40A1//BCAP29//AKTIP//BCL2L14//RNF34//CLPTM1L//TPD52L1//NAIP//BNIP3L//CD2//TGM2//TNFRSF10A//FEM1B//IFI27//ROBO1//SLAMF7//FOLR1//UCHL1//KLK8//TRPV4//GAS1//ERCC6//IL6R//LCN2//SKIL//TNFRSF4//IKZF3//CARD6//RASSF6//PPP2R5C//ALDH1A3//INPP5D//PTGS2//TSC22D1//AQP1//…
GO:0048513	organ development	Biological process	90	2141	467	14742	1.32698	0.00256773	0.24872	2.59045	CTNNA1//BMP15//HIPK2//GLI3//OVOL2//ALDH1A3//ASL//DCN//ARID5B//ZBTB16//HMGCS1//SRD5A1//PRDM1//EGFR//NSDHL//GATA4//BBS5//COL13A1//FST//RYR1//TWIST1//CPE//CDK6//CUL1//TP63//NRP1//EVL//DCX//ACSL3//FZD10//CNTN4//CASP8//MOSPD3//TCF12//CSRP3//FXR1//SGCE//USP2//SKIL//SVIL//FABP5//KRTAP5-9//SPRR3//MYO16//HES3//GAS1//AQP1//NUMB//LRP8//ROBO1//DICER1//EGF//PLCB1//TET2//RCOR1//PTGS2//DHCR7//CBFA2T3//ATRX//NOT…
GO:0060674	placenta blood vessel development	Biological process	4	19	467	14742	6.64578	0.0026389	0.248741	2.57858	FBXW8//NSDHL//OVOL2//RBM15
GO:0072529	pyrimidine-containing compound catabolic process	Biological process	5	31	467	14742	5.09152	0.00268468	0.248741	2.57111	ENTPD4//NT5M//TYMP//NT5E//NT5C3
GO:0021591	ventricular system development	Biological process	3	10	467	14742	9.47024	0.0032097	0.252138	2.49354	AQP1//CDK6//NUMB
GO:0032354	response to follicle-stimulating hormone stimulus	Biological process	3	10	467	14742	9.47024	0.0032097	0.252138	2.49354	GATA4//HMGCS1//SRD5A1
GO:0071549	cellular response to dexamethasone stimulus	Biological process	3	10	467	14742	9.47024	0.0032097	0.252138	2.49354	AQP1//ASL//SRD5A1
GO:0050864	regulation of B cell activation	Biological process	8	78	467	14742	3.23769	0.00321514	0.252138	2.4928	IKZF3//PRDM1//INPP5D//TNFRSF4//TNFSF13B//PELI1//PAXIP1//TNFSF13
GO:0046135	pyrimidine nucleoside catabolic process	Biological process	4	20	467	14742	6.31349	0.00321704	0.252138	2.49254	TYMP//NT5E//NT5C3//NT5M
GO:0019233	sensory perception of pain	Biological process	7	62	467	14742	3.56407	0.00334441	0.252138	2.47568	LXN//CCK//PROL1//ALOX5//DLG2//TAC1//NMU
GO:0006919	activation of cysteine-type endopeptidase activity involved in apoptotic process	Biological process	8	79	467	14742	3.1967	0.00348086	0.252138	2.45831	SIVA1//CASP8//CCK//IFI27//ROBO1//TPD52L1//TNFRSF10A//NOD1
GO:0097202	activation of cysteine-type endopeptidase activity	Biological process	8	79	467	14742	3.1967	0.00348086	0.252138	2.45831	CASP8//CCK//IFI27//ROBO1//TPD52L1//TNFRSF10A//NOD1//SIVA1
GO:0030888	regulation of B cell proliferation	Biological process	6	47	467	14742	4.02989	0.00349451	0.252138	2.45661	PRDM1//INPP5D//TNFRSF4//TNFSF13B//PELI1//IKZF3
GO:0071453	cellular response to oxygen levels	Biological process	6	47	467	14742	4.02989	0.00349451	0.252138	2.45661	AQP1//ASL//MDM2//STC1//TWIST1//HIPK2
GO:0016125	sterol metabolic process	Biological process	10	115	467	14742	2.745	0.00354741	0.252138	2.45009	CYP51A1//DHCR7//HMGCS1//INSIG1//LSS//MVD//TM7SF2//NSDHL//PRKAG2//PRKAA1
GO:0050867	positive regulation of cell activation	Biological process	16	236	467	14742	2.14017	0.00354957	0.252138	2.44982	CD2//TNFRSF4//TNFSF13B//PELI1//HLA-DMA//MAPKAP1//RICTOR//NCK2//MS4A2//CD83//PRDM1//INPP5D//PAXIP1//GLI3//TNFSF13//TAC1
GO:0052547	regulation of peptidase activity	Biological process	16	236	467	14742	2.14017	0.00354957	0.252138	2.44982	CASP8//CCK//IFI27//ROBO1//TPD52L1//TNFRSF10A//NOD1//SIVA1//PROL1//ITIH4//SERPINE2//LXN//PCOLCE2//DPEP1//NAIP//INTS1
GO:0080135	regulation of cellular response to stress	Biological process	16	236	467	14742	2.14017	0.00354957	0.252138	2.44982	ERCC6//MAP4K1//DBNL//KIAA1804//FZD10//MDM2//TWIST1//EGFR//ZMYND11//TPD52L1//NOD1//PLCB1//HIPK2//KLK8//FEM1B//CDK6
GO:0008284	positive regulation of cell proliferation	Biological process	31	591	467	14742	1.65582	0.0042055	0.29004	2.37618	NRP1//GLI3//GAS1//TP63//EGF//TNFRSF4//TNFSF13B//PELI1//NCK2//AQP1//CDK6//EGFR//IL6R//NOTCH3//PTGS2//TGM2//TAC1//GATA4//ALDH3A1//CCK//CNTFR//AKR1C2//MDM2//MVD//TSPAN31//SRPK2//TNFSF13//TSC22D1//PDCD10//HIPK2//TNS3
GO:0021537	telencephalon development	Biological process	11	137	467	14742	2.53461	0.00421925	0.29004	2.37476	CDK6//GLI3//AQP1//NUMB//SRD5A1//LRP8//ALDH1A3//EGFR//ROBO1//DICER1//PLCB1
GO:0071548	response to dexamethasone stimulus	Biological process	3	11	467	14742	8.60931	0.00431028	0.291594	2.36549	AQP1//ASL//SRD5A1
GO:0060348	bone development	Biological process	8	82	467	14742	3.07975	0.004381	0.291747	2.35843	COL13A1//PLXNB1//RYR1//GHR//INSIG1//TWIST1//GLI3//SRD5A1
GO:0021795	cerebral cortex cell migration	Biological process	4	22	467	14742	5.73954	0.00462021	0.302944	2.33534	GLI3//LRP8//ROBO1//EGFR
GO:0071902	positive regulation of protein serine/threonine kinase activity	Biological process	14	201	467	14742	2.19873	0.00488386	0.315379	2.31124	GHR//PRKAA1//MAPK10//NOD1//TNFRSF10A//ERCC6//MAP4K1//DBNL//KIAA1804//EGFR//EGF//TPD52L1//PDCD10//FZD10
GO:2000026	regulation of multicellular organismal development	Biological process	45	957	467	14742	1.48436	0.00506222	0.315884	2.29566	GLI3//CTNNA1//DICER1//TWIST1//TRPV4//TNMD//EGF//KLK8//ZBTB16//DEAF1//ROBO1//PLCB1//CD83//IKZF3//PRDM1//INPP5D//CD2//HLA-DMA//ERRFI1//TP63//OVOL2//CDK6//RBM15//RCOR1//BOC//NOTCH3//CNTN4//AQP1//GATA4//HIPK2//CDKL5//PAXIP1//LAMA4//TNFSF13//USP2//SERPINE2//SEMA3A//NRP1//HES3//NUMB//CHN1//PLXNB1//SKIL//FST//PTGS2
GO:0046328	regulation of JNK cascade	Biological process	10	121	467	14742	2.60888	0.00509517	0.315884	2.29284	ERCC6//MAP4K1//DBNL//KIAA1804//FZD10//ZMYND11//TPD52L1//NOD1//PLCB1//HIPK2
GO:0051239	regulation of multicellular organismal process	Biological process	67	1550	467	14742	1.36453	0.00511403	0.315884	2.29124	SFTPD//NDRG2//PELI1//CSRP3//SEMA3A//GLI3//TAC1//NMU//CTNNA1//KCNQ1//HSPB7//PTGS2//AQP1//THBD//GATA4//DICER1//TWIST1//TRPV4//TNMD//FST//EGF//SERPINE2//KLK8//ZBTB16//AFAP1L2//CD83//IL6R//PLCB1//NOD1//CLEC7A//DEAF1//ROBO1//GHR//INPP5D//IKZF3//PRDM1//CD2//HLA-DMA//ERRFI1//TP63//OVOL2//CDK6//RBM15//RCOR1//BOC//NOTCH3//CNTN4//HIPK2//CDKL5//PAXIP1//ALOX5//LAMA4//JPH3//SYNGR1//TNFSF13//USP2//NRP1//TNFRSF…
GO:0021543	pallium development	Biological process	8	85	467	14742	2.97105	0.00545029	0.327456	2.26358	CDK6//SRD5A1//LRP8//EGFR//GLI3//ROBO1//PLCB1//DICER1
GO:0043616	keratinocyte proliferation	Biological process	4	23	467	14742	5.48999	0.00545504	0.327456	2.2632	OVOL2//PTPRK//TP63//KLK8
GO:0051414	response to cortisol stimulus	Biological process	3	12	467	14742	7.89186	0.00561308	0.327712	2.2508	AQP1//ASL//SRD5A1
GO:0060716	labyrinthine layer blood vessel development	Biological process	3	12	467	14742	7.89186	0.00561308	0.327712	2.2508	FBXW8//NSDHL//OVOL2
GO:0050865	regulation of cell activation	Biological process	20	339	467	14742	1.86239	0.00583028	0.335793	2.23431	THBD//CD2//IKZF3//PRDM1//INPP5D//TNFRSF4//TNFSF13B//PELI1//HLA-DMA//MAPKAP1//RICTOR//NCK2//SFTPD//MS4A2//CD83//PAXIP1//GLI3//TNFSF13//TAC1//SERPINE2
GO:0007411	axon guidance	Biological process	20	341	467	14742	1.85146	0.00621132	0.347243	2.20682	CHN1//KIF5C//ROBO1//SEMA3A//NRP1//COL6A2//DCX//EGFR//GAS1//GLI3//HSP90AA1//PLXNB1//NCK2//NUMB//WASL//SEMA5A//NRXN3//PLXNC1//EVL//CNTN4
GO:0052548	regulation of endopeptidase activity	Biological process	15	229	467	14742	2.06774	0.00639283	0.347243	2.19431	CASP8//CCK//IFI27//ROBO1//TPD52L1//TNFRSF10A//NOD1//SIVA1//ITIH4//SERPINE2//LXN//PROL1//DPEP1//NAIP//INTS1
GO:0006720	isoprenoid metabolic process	Biological process	7	70	467	14742	3.15675	0.00657143	0.347243	2.18234	RARRES2//ALDH1A3//HMGCS1//MVD//SRD5A1//BCO2//AKR1C1
GO:0006637	acyl-CoA metabolic process	Biological process	5	38	467	14742	4.15361	0.00661717	0.347243	2.17933	ACSL1//ACSL3//ACSL6//HSD17B12//ELOVL3
GO:0035383	thioester metabolic process	Biological process	5	38	467	14742	4.15361	0.00661717	0.347243	2.17933	ACSL6//ACSL1//ACSL3//HSD17B12//ELOVL3
GO:0060538	skeletal muscle organ development	Biological process	11	146	467	14742	2.37837	0.00677779	0.347243	2.16891	DCN//SKIL//SVIL//CSRP3//PLCB1//BOC//TWIST1//USP2//RYR1//ASL//CNTFR
GO:0010952	positive regulation of peptidase activity	Biological process	9	107	467	14742	2.65521	0.0068786	0.347243	2.1625	CASP8//CCK//IFI27//ROBO1//TPD52L1//TNFRSF10A//NOD1//SIVA1//PCOLCE2
GO:0048812	neuron projection morphogenesis	Biological process	28	537	467	14742	1.64598	0.00687971	0.347243	2.16243	CCK//CNTN4//COL6A2//DCX//EGFR//GAS1//GLI3//HSP90AA1//PLXNB1//ROBO1//NCK2//NUMB//NRP1//WASL//SEMA5A//NRXN3//PLXNC1//SEMA3A//EVL//UCHL1//CHN1//KIF5C//CTNNA1//CDKL5//KLK8//CELSR2//SKIL//DICER1
GO:0072358	cardiovascular system development	Biological process	34	689	467	14742	1.55776	0.00706103	0.347243	2.15113	CASP8//TYMP//EGF//SRPK2//NRXN3//PDCD10//DICER1//RASIP1//OVOL2//DHCR7//LAMA4//NRP1//SEMA5A//RBM15//ZFP36L1//FZD10//GATA4//BBS5//ROBO1//RYR1//TWIST1//CPE//GLI3//MOSPD3//TNMD//AQP1//HIPK2//CSRP3//TTN//ERRFI1//FBXW8//NSDHL//NOTCH3//PTGS2
GO:0072359	circulatory system development	Biological process	34	689	467	14742	1.55776	0.00706103	0.347243	2.15113	CASP8//TYMP//EGF//SRPK2//NRXN3//PDCD10//DICER1//RASIP1//OVOL2//DHCR7//LAMA4//NRP1//SEMA5A//RBM15//ZFP36L1//FZD10//GATA4//BBS5//ROBO1//RYR1//TWIST1//CPE//GLI3//MOSPD3//TNMD//AQP1//HIPK2//CSRP3//TTN//ERRFI1//FBXW8//NSDHL//NOTCH3//PTGS2
GO:0051251	positive regulation of lymphocyte activation	Biological process	14	210	467	14742	2.1045	0.00712665	0.347243	2.14711	TNFRSF4//TNFSF13B//PELI1//HLA-DMA//MAPKAP1//RICTOR//NCK2//CD83//PRDM1//INPP5D//PAXIP1//GLI3//TNFSF13//TAC1
GO:0006884	cell volume homeostasis	Biological process	3	13	467	14742	7.2848	0.00712719	0.347243	2.14708	AQP1//SLC12A7//TRPV4
GO:0042448	progesterone metabolic process	Biological process	3	13	467	14742	7.2848	0.00712719	0.347243	2.14708	AKR1C1//AKR1C2//SRD5A1
GO:0007409	axonogenesis	Biological process	26	490	467	14742	1.67501	0.00727601	0.347243	2.13811	COL6A2//DCX//EGFR//GAS1//GLI3//HSP90AA1//PLXNB1//ROBO1//NCK2//NUMB//NRP1//WASL//SEMA5A//NRXN3//PLXNC1//SEMA3A//EVL//CNTN4//UCHL1//CHN1//KIF5C//CTNNA1//CDKL5//KLK8//SKIL//CCK
GO:0008203	cholesterol metabolic process	Biological process	9	108	467	14742	2.63062	0.00730027	0.347243	2.13666	CYP51A1//DHCR7//HMGCS1//INSIG1//LSS//MVD//TM7SF2//NSDHL//PRKAA1
GO:0016101	diterpenoid metabolic process	Biological process	5	39	467	14742	4.04711	0.0073971	0.347243	2.13094	RARRES2//ALDH1A3//BCO2//AKR1C1//SRD5A1
GO:0042755	eating behavior	Biological process	4	25	467	14742	5.05079	0.00741415	0.347243	2.12994	CCK//PYY//UCHL1//NMU
GO:0051249	regulation of lymphocyte activation	Biological process	17	278	467	14742	1.93038	0.00752605	0.348653	2.12343	IKZF3//PRDM1//INPP5D//TNFRSF4//TNFSF13B//PELI1//HLA-DMA//MAPKAP1//RICTOR//NCK2//SFTPD//CD83//CD2//PAXIP1//GLI3//TNFSF13//TAC1
GO:0042100	B cell proliferation	Biological process	6	55	467	14742	3.44372	0.00763465	0.34988	2.11721	IKZF3//PRDM1//INPP5D//TNFRSF4//TNFSF13B//PELI1
GO:2000021	regulation of ion homeostasis	Biological process	9	109	467	14742	2.60649	0.00774142	0.350997	2.11118	TAC1//P2RX2//RYR1//KLK8//DICER1//MS4A2//CCK//SLC30A3//UMOD
GO:0002009	morphogenesis of an epithelium	Biological process	18	302	467	14742	1.8815	0.00782373	0.350997	2.10659	NRP1//SEMA5A//RBM15//GLI3//TP63//CASP8//OVOL2//TWIST1//DEAF1//GATA4//BBS5//ALDH1A3//PCDH8//FEM1B//TGM2//EGFR//SEMA3A//ROBO1
GO:0048729	tissue morphogenesis	Biological process	22	397	467	14742	1.74933	0.00807563	0.358524	2.09282	NRP1//SEMA5A//RBM15//GLI3//TP63//CASP8//OVOL2//TWIST1//DEAF1//GATA4//BBS5//ALDH1A3//PCDH8//DICER1//ERRFI1//KLK14//TTN//FEM1B//TGM2//EGFR//SEMA3A//ROBO1
GO:0071385	cellular response to glucocorticoid stimulus	Biological process	4	26	467	14742	4.85653	0.00854696	0.375538	2.06819	AQP1//ASL//SRD5A1//STC1
GO:0045444	fat cell differentiation	Biological process	9	111	467	14742	2.55952	0.0086844	0.377683	2.06126	INSIG1//ZBTB16//LAMA4//RARRES2//PTGS2//PLCB1//STEAP4//ARID5B//TBL1Y
GO:0071526	semaphorin-plexin signaling pathway	Biological process	3	14	467	14742	6.76445	0.00886022	0.381437	2.05256	PLXNB1//NRP1//SEMA3A
GO:0001525	angiogenesis	Biological process	19	330	467	14742	1.81752	0.009095	0.386049	2.0412	NRP1//SEMA5A//RBM15//ROBO1//TNMD//AQP1//GATA4//TWIST1//HIPK2//PTGS2//CASP8//TYMP//EGF//SRPK2//NRXN3//PDCD10//DICER1//RASIP1//OVOL2
GO:0035239	tube morphogenesis	Biological process	16	261	467	14742	1.93517	0.00914852	0.386049	2.03865	NRP1//SEMA5A//RBM15//GLI3//CASP8//OVOL2//TWIST1//DEAF1//GATA4//BBS5//EGF//DICER1//RASIP1//TP63//TGM2//ROBO1
GO:0043281	regulation of cysteine-type endopeptidase activity involved in apoptotic process	Biological process	11	153	467	14742	2.26956	0.00950122	0.397002	2.02222	CASP8//CCK//IFI27//ROBO1//TPD52L1//TNFRSF10A//NOD1//SIVA1//DPEP1//NAIP//INTS1
GO:0009164	nucleoside catabolic process	Biological process	4	27	467	14742	4.67666	0.00978724	0.400538	2.00934	TYMP//NT5E//NT5C3//NT5M
GO:0071384	cellular response to corticosteroid stimulus	Biological process	4	27	467	14742	4.67666	0.00978724	0.400538	2.00934	STC1//AQP1//ASL//SRD5A1
GO:0050770	regulation of axonogenesis	Biological process	8	94	467	14742	2.68659	0.00986778	0.400538	2.00578	CDKL5//KLK8//SEMA3A//NRP1//PLXNB1//ROBO1//SKIL//CHN1
GO:0006732	coenzyme metabolic process	Biological process	13	197	467	14742	2.08313	0.0101058	0.406331	1.99543	ACSS2//H6PD//NNT//ACSL6//PANK1//ALDH1L1//PDK3//MVD//ACSL1//ACSL3//HSD17B12//ELOVL3//FOLR1
GO:0032872	regulation of stress-activated MAPK cascade	Biological process	10	134	467	14742	2.35578	0.0102379	0.407794	1.98979	ERCC6//MAP4K1//DBNL//KIAA1804//FZD10//ZMYND11//TPD52L1//NOD1//PLCB1//HIPK2
GO:0035295	tube development	Biological process	21	383	467	14742	1.73085	0.0106548	0.416239	1.97246	NRP1//SEMA5A//RBM15//GLI3//CASP8//OVOL2//TWIST1//DEAF1//GATA4//BBS5//DHCR7//DICER1//SFTPD//ERRFI1//TNS3//EGF//RASIP1//TP63//TGM2//ROBO1//UMOD
GO:0070302	regulation of stress-activated protein kinase signaling cascade	Biological process	10	135	467	14742	2.33833	0.0107551	0.416239	1.96838	ERCC6//MAP4K1//DBNL//KIAA1804//FZD10//ZMYND11//TPD52L1//NOD1//PLCB1//HIPK2
GO:0007413	axonal fasciculation	Biological process	3	15	467	14742	6.31349	0.0108184	0.416239	1.96584	NRP1//SEMA3A//CNTN4
GO:0007254	JNK cascade	Biological process	11	156	467	14742	2.22591	0.0108985	0.416239	1.96263	ERCC6//MAP4K1//DBNL//KIAA1804//MAPK10//FZD10//ZMYND11//TPD52L1//NOD1//PLCB1//HIPK2
GO:0048667	cell morphogenesis involved in neuron differentiation	Biological process	27	532	467	14742	1.60211	0.0110137	0.416239	1.95807	CCK//CNTN4//COL6A2//DCX//EGFR//GAS1//GLI3//HSP90AA1//PLXNB1//ROBO1//NCK2//NUMB//NRP1//WASL//SEMA5A//NRXN3//PLXNC1//SEMA3A//EVL//UCHL1//CHN1//KIF5C//CTNNA1//CDKL5//KLK8//CELSR2//SKIL
GO:0007420	brain development	Biological process	23	433	467	14742	1.67679	0.0110688	0.416239	1.9559	CDK6//GLI3//MYO16//HES3//GAS1//AQP1//NUMB//SRD5A1//LRP8//ALDH1A3//EGFR//ROBO1//DICER1//EGF//PLCB1//ATRX//NOTCH3//OTX1//DCX//ACSL3//HMGCS1//FZD10//CNTN4
GO:0048565	digestive tract development	Biological process	8	96	467	14742	2.63062	0.0111336	0.416239	1.95337	GLI3//ASL//EGFR//GATA4//OVOL2//RARRES2//TP63//DICER1
GO:0009888	tissue development	Biological process	49	1111	467	14742	1.39226	0.0113762	0.42161	1.944	NRP1//SEMA5A//RBM15//GLI3//GATA4//TP63//OVOL2//CASP8//TWIST1//DEAF1//TNMD//EGFR//NSDHL//BBS5//ALDH1A3//SLC40A1//ELF5//MEST//IKZF3//DCN//SKIL//SVIL//CSRP3//FABP5//KRTAP5-9//SPRR3//PCDH8//PTGS2//DICER1//ZBTB16//ROBO1//NOTCH3//ENO3//RYR1//ERRFI1//PLCB1//BOC//STC1//USP2//KLK14//TTN//FST//GHR//FEM1B//TGM2//ARID5B//SEMA3A//PDE4D//UMOD
GO:0008202	steroid metabolic process	Biological process	16	268	467	14742	1.88462	0.0115874	0.425736	1.93602	LSS//HSD17B12//CYP51A1//DHCR7//HMGCS1//INSIG1//MVD//TM7SF2//NSDHL//SRD5A1//AKR1C1//SLC10A2//SULT1E1//PRKAG2//AKR1C2//PRKAA1
GO:0051606	detection of stimulus	Biological process	12	179	467	14742	2.11625	0.0117284	0.427235	1.93076	CLEC7A//KCNIP1//OPN5//RP1//TAS2R8//TAC1//NPFFR2//NOD1//OR8B8//OR8G1//LXN//CADM1
GO:2000116	regulation of cysteine-type endopeptidase activity	Biological process	11	158	467	14742	2.19773	0.011914	0.430319	1.92394	CASP8//CCK//IFI27//ROBO1//TPD52L1//TNFRSF10A//NOD1//SIVA1//DPEP1//NAIP//INTS1
GO:0002694	regulation of leukocyte activation	Biological process	18	316	467	14742	1.79815	0.0121157	0.431963	1.91665	CD2//IKZF3//PRDM1//INPP5D//TNFRSF4//TNFSF13B//PELI1//HLA-DMA//MAPKAP1//RICTOR//NCK2//SFTPD//MS4A2//CD83//PAXIP1//GLI3//TNFSF13//TAC1
GO:0043280	positive regulation of cysteine-type endopeptidase activity involved in apoptotic process	Biological process	8	98	467	14742	2.57693	0.0125154	0.431963	1.90255	CASP8//CCK//IFI27//ROBO1//TPD52L1//TNFRSF10A//NOD1//SIVA1
GO:2001056	positive regulation of cysteine-type endopeptidase activity	Biological process	8	98	467	14742	2.57693	0.0125154	0.431963	1.90255	CASP8//CCK//IFI27//ROBO1//TPD52L1//TNFRSF10A//NOD1//SIVA1
GO:0007435	salivary gland morphogenesis	Biological process	4	29	467	14742	4.35413	0.0126046	0.431963	1.89947	TGM2//NRP1//SEMA3A//EGFR
GO:0008038	neuron recognition	Biological process	4	29	467	14742	4.35413	0.0126046	0.431963	1.89947	NRP1//SEMA3A//CNTN4//ROBO1
GO:0007517	muscle organ development	Biological process	17	294	467	14742	1.82533	0.012674	0.431963	1.89708	DCN//SKIL//SVIL//CSRP3//PLCB1//BOC//TWIST1//USP2//ARID5B//RYR1//TTN//GATA4//CNTFR//ASL//TCF12//FXR1//SGCE
GO:0001763	morphogenesis of a branching structure	Biological process	12	181	467	14742	2.09287	0.0127252	0.431963	1.89534	NRP1//SEMA5A//RBM15//GLI3//EGF//DICER1//RASIP1//FEM1B//TGM2//TP63//SEMA3A//COL13A1
GO:0009125	nucleoside monophosphate catabolic process	Biological process	3	16	467	14742	5.9189	0.0130066	0.431963	1.88584	NT5E//PDE4D//NT5M
GO:0048557	embryonic digestive tract morphogenesis	Biological process	3	16	467	14742	5.9189	0.0130066	0.431963	1.88584	GATA4//GLI3//OVOL2
GO:0007399	nervous system development	Biological process	66	1590	467	14742	1.31035	0.0130478	0.431963	1.88446	CCK//DCX//CELSR2//CDKL5//TWIST1//CASP8//OVOL2//DEAF1//GLI3//ACSL6//CTNNA1//CNTN4//COL6A2//EGFR//GAS1//HSP90AA1//PLXNB1//ROBO1//NCK2//NUMB//NRP1//WASL//SEMA5A//NRXN3//PLXNC1//SEMA3A//EVL//UCHL1//PCDHB2//ZBTB16//ACSL3//HMGCS1//FZD10//CHN1//KIF5C//DICER1//TRPV4//CDK6//SRD5A1//MYO16//HES3//AQP1//LRP8//ALDH1A3//EGF//PLCB1//HIPK2//ATRX//NOTCH3//OTX1//EFHD1//KLK8//RP1//DLG2//TP63//SERPINE2//SKIL//CNTFR/…
GO:0043405	regulation of MAP kinase activity	Biological process	14	226	467	14742	1.95551	0.0130744	0.431963	1.88358	GHR//PRKAA1//MAPK10//NOD1//ERCC6//MAP4K1//DBNL//KIAA1804//EGF//EGFR//TPD52L1//PDCD10//UCHL1//FZD10
GO:0022612	gland morphogenesis	Biological process	8	99	467	14742	2.55091	0.0132517	0.434452	1.87773	EGFR//FEM1B//TGM2//TP63//GLI3//NRP1//SEMA3A//ROBO1
GO:0010033	response to organic substance	Biological process	67	1620	467	14742	1.30557	0.0133749	0.434775	1.87371	PXDN//CLEC7A//HSP90AA1//HSPB7//YOD1//HERPUD2//GRB10//PRKAA1//APPL1//PRKAG2//MDM2//PDE1A//PPP2CB//MAPKAP1//RICTOR//TAC1//STEAP2//COL6A2//PTGS2//GHR//DICER1//HMGCS1//PLCB1//ALDH3A1//CTNNA1//ACSL3//STC1//CD83//ASL//HLA-DMA//IFI27//IL2RB//IL6R//OAS1//LRP8//VN1R1//DERL3//RYR1//SLC22A6//PRDM1//SRD5A1//CASP8//DCN//S100A9//THBD//PELI1//NPPA//TNFRSF4//AKR1C2//NRP1//GAS1//GATA4//TBL1Y//ADH6//ATP5G3//SLC9A3…
GO:0007613	memory	Biological process	6	62	467	14742	3.05491	0.0134656	0.434775	1.87078	GRIA1//TAC1//PTGS2//KLK8//PLCB1//JPH3
GO:0035023	regulation of Rho protein signal transduction	Biological process	11	161	467	14742	2.15678	0.0135707	0.434873	1.8674	CHN1//RICTOR//RASIP1//PLXNB1//ERRFI1//CDKL5//FZD10//RASGRF2//KALRN//PLEKHG6//SLC26A10
GO:0009108	coenzyme biosynthetic process	Biological process	8	100	467	14742	2.5254	0.0140192	0.444407	1.85328	ACSS2//PDK3//PANK1//ACSL1//ACSL3//ACSL6//HSD17B12//ELOVL3
GO:0022029	telencephalon cell migration	Biological process	4	30	467	14742	4.20899	0.0141883	0.444407	1.84807	EGFR//GLI3//LRP8//ROBO1
GO:0048566	embryonic digestive tract development	Biological process	4	30	467	14742	4.20899	0.0141883	0.444407	1.84807	GATA4//GLI3//OVOL2//RARRES2
GO:0048514	blood vessel morphogenesis	Biological process	21	394	467	14742	1.68253	0.0142852	0.444407	1.84511	CASP8//TYMP//EGF//SRPK2//NRXN3//PDCD10//DICER1//RASIP1//OVOL2//NRP1//SEMA5A//RBM15//ZFP36L1//ROBO1//TNMD//AQP1//GATA4//TWIST1//HIPK2//NOTCH3//PTGS2
GO:0001892	embryonic placenta development	Biological process	6	63	467	14742	3.00642	0.0144975	0.447741	1.83871	PLK4//FBXW8//NSDHL//OVOL2//PRDM1//EGFR
GO:0006721	terpenoid metabolic process	Biological process	5	46	467	14742	3.43124	0.0147126	0.447894	1.83231	RARRES2//ALDH1A3//SRD5A1//BCO2//AKR1C1
GO:0019432	triglyceride biosynthetic process	Biological process	5	46	467	14742	3.43124	0.0147126	0.447894	1.83231	ACSL1//ACSL3//ACSL6//HSD17B12//ELOVL3
GO:0010950	positive regulation of endopeptidase activity	Biological process	8	102	467	14742	2.47588	0.0156505	0.473066	1.80547	CASP8//CCK//IFI27//ROBO1//TPD52L1//TNFRSF10A//NOD1//SIVA1
GO:0006206	pyrimidine base metabolic process	Biological process	4	31	467	14742	4.07322	0.0158925	0.473663	1.79881	TYMP//NT5E//NT5C3//NT5M
GO:0071482	cellular response to light stimulus	Biological process	4	31	467	14742	4.07322	0.0158925	0.473663	1.79881	AQP1//PTPRK//TP63//RP1
GO:0048546	digestive tract morphogenesis	Biological process	5	47	467	14742	3.35824	0.0160481	0.474979	1.79458	GLI3//GATA4//OVOL2//TP63//EGFR
GO:0050790	regulation of catalytic activity	Biological process	61	1468	467	14742	1.31173	0.0164865	0.48459	1.78287	GTF2H1//CCNK//MAP4K1//EGF//GHR//PRKAA1//MAPK10//NOD1//ERRFI1//PRKAG2//CASP8//CCK//IFI27//ROBO1//TPD52L1//TNFRSF10A//PILRB//NCK2//GNG13//EGFR//MS4A2//PDE1A//ERCC6//DBNL//KIAA1804//SIVA1//PROL1//IL6R//DLG2//ITIH4//SERPINE2//LXN//PCOLCE2//CHN1//RICTOR//RASIP1//PLXNB1//CDKL5//FZD10//DPEP1//NAIP//INTS1//PDCD10//UCHL1//PLCB1//PIK3R5//TTN//TNFRSF4//LRP8//HSP90AA1//WASL//NOSTRIN//TMLHE//PSMA3//FBXO5//CUL…
GO:0055123	digestive system development	Biological process	8	104	467	14742	2.42827	0.017415	0.49415	1.75908	GLI3//ASL//EGFR//GATA4//OVOL2//DICER1//RARRES2//TP63
GO:0006213	pyrimidine nucleoside metabolic process	Biological process	5	48	467	14742	3.28828	0.0174619	0.49415	1.75791	ENTPD4//TYMP//NT5E//NT5C3//NT5M
GO:0045767	regulation of anti-apoptosis	Biological process	5	48	467	14742	3.28828	0.0174619	0.49415	1.75791	SIVA1//IL6R//PRKAA1//TNFRSF4//SERBP1
GO:0021885	forebrain cell migration	Biological process	4	32	467	14742	3.94593	0.0177199	0.49415	1.75154	EGFR//GLI3//LRP8//ROBO1
GO:0030900	forebrain development	Biological process	14	235	467	14742	1.88061	0.0178012	0.49415	1.74955	CDK6//GLI3//AQP1//NUMB//SRD5A1//LRP8//ALDH1A3//EGFR//ROBO1//DICER1//PLCB1//ATRX//NOTCH3//OTX1
GO:0045860	positive regulation of protein kinase activity	Biological process	21	403	467	14742	1.64495	0.0179322	0.49415	1.74637	MAP4K1//EGF//GHR//PRKAA1//MAPK10//NOD1//PILRB//CCK//MS4A2//TNFRSF10A//ERCC6//DBNL//KIAA1804//IL6R//EGFR//TPD52L1//PDCD10//FZD10//AFAP1L2//LRP8//PRKAG2
GO:0031175	neuron projection development	Biological process	30	632	467	14742	1.49845	0.0180147	0.49415	1.74437	CCK//CNTN4//COL6A2//DCX//EGFR//GAS1//GLI3//HSP90AA1//PLXNB1//ROBO1//NCK2//NUMB//NRP1//WASL//SEMA5A//NRXN3//PLXNC1//SEMA3A//EVL//UCHL1//CHN1//KIF5C//TRPV4//CTNNA1//CDKL5//KLK8//DICER1//CELSR2//SKIL//EFHD1
GO:0002065	columnar/cuboidal epithelial cell differentiation	Biological process	3	18	467	14742	5.26124	0.0180872	0.49415	1.74263	TP63//GATA4//DICER1
GO:0015721	bile acid and bile salt transport	Biological process	3	18	467	14742	5.26124	0.0180872	0.49415	1.74263	AQP9//AKR1C1//SLC10A2
GO:0045577	regulation of B cell differentiation	Biological process	3	18	467	14742	5.26124	0.0180872	0.49415	1.74263	PRDM1//INPP5D//IKZF3
GO:0050922	negative regulation of chemotaxis	Biological process	3	18	467	14742	5.26124	0.0180872	0.49415	1.74263	NRP1//SEMA3A//ROBO1
GO:0032844	regulation of homeostatic process	Biological process	13	213	467	14742	1.92665	0.0183413	0.497903	1.73657	TAC1//P2RX2//RYR1//PTGS2//KLK8//DICER1//CDK6//INPP5D//MS4A2//CCK//SLC30A3//UMOD//PRKAA1
GO:0045597	positive regulation of cell differentiation	Biological process	22	430	467	14742	1.61508	0.0188843	0.506276	1.7239	GLI3//TWIST1//DICER1//ZBTB16//CD83//PRDM1//INPP5D//HLA-DMA//RCOR1//PLCB1//BOC//IL6R//CDKL5//SERPINE2//NUMB//PLXNB1//ROBO1//SKIL//CTNNA1//GATA4//PTGS2//GHR
GO:0009653	anatomical structure morphogenesis	Biological process	74	1847	467	14742	1.26475	0.0188873	0.506276	1.72383	EGFR//CASP8//TYMP//EGF//SRPK2//NRXN3//PDCD10//DICER1//RASIP1//OVOL2//NRP1//SEMA5A//RBM15//ZFP36L1//GLI3//GATA4//TP63//PCDH8//COL13A1//SKIL//TWIST1//DEAF1//TNMD//BBS5//ROBO1//ALDH1A3//RYR1//CPE//CFC1B//DCN//CUL1//EVL//CCK//CNTN4//COL6A2//DCX//GAS1//HSP90AA1//PLXNB1//NCK2//NUMB//WASL//PLXNC1//SEMA3A//UCHL1//CHN1//KIF5C//CCL13//WASF3//HIPK2//HES3//LRP8//TTN//SP9//CTNNA1//ZBTB16//NOTCH3//INSIG1//OTX1…
GO:0019217	regulation of fatty acid metabolic process	Biological process	6	67	467	14742	2.82694	0.0191752	0.51078	1.71726	PTGS2//TWIST1//PRKAG2//INSIG1//ACSL1//PRKAA1
GO:0007431	salivary gland development	Biological process	4	33	467	14742	3.82636	0.019673	0.520784	1.70613	EGFR//TGM2//NRP1//SEMA3A
GO:0046460	neutral lipid biosynthetic process	Biological process	5	50	467	14742	3.15675	0.0205313	0.536837	1.68758	ACSL1//ACSL3//ACSL6//HSD17B12//ELOVL3
GO:0046463	acylglycerol biosynthetic process	Biological process	5	50	467	14742	3.15675	0.0205313	0.536837	1.68758	ACSL1//ACSL3//ACSL6//HSD17B12//ELOVL3
GO:0050794	regulation of cellular process	Biological process	260	7509	467	14742	1.09303	0.020852	0.540393	1.68085	MDM2//PSMA3//GTF2H1//CCNK//FBXO5//PRDM1//GLI3//MEIS2//PER1//SKIL//TWIST1//ZNF189//TP63//USP2//MTA2//ST18//FST//ZMYND11//RCOR1//DICER1//HIPK2//RBM15//HES3//MAP4K1//EGF//GHR//PRKAA1//MAPK10//NOD1//PAXIP1//TLK2//PELI2//AKTIP//TNMD//NRP1//CDK6//PXDN//GAS1//CLEC7A//PELI1//IL6R//ERCC6//PTGS2//OVOL2//CELSR2//NDRG2//CCK//CNTFR//CSF3R//EGFR//GNG11//GRB10//GRIA1//HSP90AA1//IL2RB//INPP5D//NRGN//OR1F1//PDE1A…
GO:0045616	regulation of keratinocyte differentiation	Biological process	3	19	467	14742	4.98433	0.0209837	0.540393	1.67812	TP63//OVOL2//ERRFI1
GO:0045859	regulation of protein kinase activity	Biological process	28	588	467	14742	1.50321	0.0210477	0.540393	1.6768	GTF2H1//CCNK//MAP4K1//EGF//GHR//PRKAA1//MAPK10//NOD1//ERRFI1//PRKAG2//PILRB//NCK2//CCK//MS4A2//TNFRSF10A//ERCC6//DBNL//KIAA1804//IL6R//EGFR//TPD52L1//PDCD10//UCHL1//FZD10//LRP8//AFAP1L2//TTN//TNFRSF4
GO:0048468	cell development	Biological process	54	1292	467	14742	1.31938	0.0212809	0.543109	1.67201	TRIP13//FBXO5//OVOL2//TNMD//GLI3//TP63//CDK6//PRDM1//DEAF1//SPAG6//CTNNA1//CCK//CNTN4//COL6A2//DCX//EGFR//GAS1//HSP90AA1//PLXNB1//ROBO1//NCK2//NUMB//NRP1//WASL//SEMA5A//NRXN3//PLXNC1//SEMA3A//EVL//UCHL1//CHN1//KIF5C//DICER1//TWIST1//TRPV4//TTN//EFHD1//RP1//DLG2//PLCB1//BOC//NOTCH3//CDKL5//ZBTB16//KLK8//SERPINE2//RYR1//CELSR2//HES3//SKIL//BMP15//FEM1B//PDE4D//ARID5B
GO:0007257	activation of JUN kinase activity	Biological process	4	34	467	14742	3.71382	0.0217537	0.547114	1.66247	ERCC6//MAP4K1//DBNL//KIAA1804
GO:0050999	regulation of nitric-oxide synthase activity	Biological process	4	34	467	14742	3.71382	0.0217537	0.547114	1.66247	EGFR//HSP90AA1//WASL//NOSTRIN
GO:0060429	epithelium development	Biological process	25	513	467	14742	1.53837	0.022092	0.547114	1.65576	NRP1//SEMA5A//RBM15//GLI3//TP63//CASP8//OVOL2//TWIST1//DEAF1//TNMD//GATA4//BBS5//ALDH1A3//PCDH8//SPRR3//ROBO1//ERRFI1//FEM1B//TGM2//EGFR//DICER1//ELF5//SEMA3A//PDE4D//UMOD
GO:0043549	regulation of kinase activity	Biological process	29	617	467	14742	1.48372	0.0222872	0.547114	1.65195	GTF2H1//CCNK//MAP4K1//EGF//GHR//PRKAA1//MAPK10//NOD1//ERRFI1//PRKAG2//PILRB//NCK2//CCK//MS4A2//TNFRSF10A//ERCC6//DBNL//KIAA1804//IL6R//EGFR//TPD52L1//PDCD10//UCHL1//FZD10//PIK3R5//TTN//TNFRSF4//LRP8//AFAP1L2
GO:0048858	cell projection morphogenesis	Biological process	29	617	467	14742	1.48372	0.0222872	0.547114	1.65195	CCK//CNTN4//COL6A2//DCX//EGFR//GAS1//GLI3//HSP90AA1//PLXNB1//ROBO1//NCK2//NUMB//NRP1//WASL//SEMA5A//NRXN3//PLXNC1//SEMA3A//EVL//UCHL1//CHN1//KIF5C//CTNNA1//BBS5//CDKL5//KLK8//DICER1//CELSR2//SKIL
GO:0050789	regulation of biological process	Biological process	273	7933	467	14742	1.08634	0.0225454	0.547114	1.64694	MDM2//PSMA3//GTF2H1//CCNK//FBXO5//PRDM1//GLI3//MEIS2//PER1//SKIL//TWIST1//ZNF189//TP63//USP2//MTA2//ST18//FST//ZMYND11//RCOR1//DICER1//HIPK2//RBM15//HES3//MAP4K1//EGF//GHR//PRKAA1//MAPK10//NOD1//PAXIP1//TLK2//SFTPD//NDRG2//PELI1//PELI2//AKTIP//TNMD//NRP1//CDK6//PXDN//CSRP3//SEMA3A//SLC9A3//GAS1//CLEC7A//TNFSF13//TNFSF13B//TAC1//IL6R//ERCC6//PTGS2//OVOL2//CELSR2//CCK//CNTFR//CSF3R//EGFR//GNG11//GR…
GO:0045595	regulation of cell differentiation	Biological process	38	857	467	14742	1.39972	0.0226127	0.547114	1.64565	GLI3//CTNNA1//DICER1//TWIST1//TRPV4//ZBTB16//CD83//IKZF3//PRDM1//INPP5D//CD2//HLA-DMA//CDK6//SKIL//GHR//INSIG1//ERRFI1//TP63//OVOL2//RBM15//RCOR1//PLCB1//BOC//NOTCH3//CNTN4//IL6R//CDKL5//KLK8//SERPINE2//ROBO1//SEMA3A//NRP1//HES3//NUMB//CHN1//PLXNB1//GATA4//PTGS2
GO:0070887	cellular response to chemical stimulus	Biological process	58	1410	467	14742	1.29852	0.0230046	0.547114	1.63819	PXDN//IL6R//NAT1//ADH6//CYP51A1//AKR1C1//FMO3//PTGS2//SULT1E1//ACSS2//GRB10//PRKAA1//APPL1//PRKAG2//MDM2//PDE1A//PPP2CB//MAPKAP1//RICTOR//GHR//CLEC7A//DICER1//RARRES2//HLA-DMA//IFI27//IL2RB//OAS1//LRP8//S100A9//YOD1//DERL3//SRD5A1//TNFRSF4//PTPRK//DPEP1//PLCB1//NRP1//GAS1//CCL13//SFTPD//ROBO1//CNTFR//AQP1//ASL//FZD10//RYR1//AQP9//STC1//GRIK5//GATA4//HMGCS1//GNG11//GNG13//AKR1C2//TWIST1//HIPK2//CT…
GO:0006917	induction of apoptosis	Biological process	20	389	467	14742	1.62301	0.0233375	0.547114	1.63195	SLAMF7//CASP8//IFI27//RASGRF2//KALRN//MAGED1//TNFRSF10A//CUL1//HIPK2//ERCC6//CADM1//PPP2R5C//TP63//BNIP3L//CD2//TGM2//TPD52L1//FEM1B//NOD1//SIVA1
GO:0050769	positive regulation of neurogenesis	Biological process	8	110	467	14742	2.29581	0.0235612	0.547114	1.6278	GLI3//DICER1//CDKL5//SERPINE2//PLXNB1//ROBO1//SKIL//NUMB
GO:0065007	biological regulation	Biological process	287	8387	467	14742	1.08023	0.0236541	0.547114	1.62609	MDM2//PSMA3//GTF2H1//CCNK//FBXO5//PRDM1//GLI3//MEIS2//PER1//SKIL//TWIST1//ZNF189//TP63//USP2//MTA2//ST18//FST//ZMYND11//RCOR1//DICER1//HIPK2//RBM15//HES3//MAP4K1//EGF//GHR//PRKAA1//MAPK10//NOD1//PAXIP1//FBXO4//TLK2//TNFSF13B//SFTPD//NDRG2//PELI1//PELI2//AKTIP//TNMD//NRP1//CDK6//PXDN//CSRP3//SEMA3A//SLC9A3//GAS1//ALDH1A3//CLEC7A//SLC40A1//TNFSF13//TAC1//IL6R//AQP1//ERCC6//PTGS2//OVOL2//CD2//F13B//…
GO:0003006	developmental process involved in reproduction	Biological process	20	390	467	14742	1.61884	0.0239035	0.547114	1.62154	CTNNA1//BMP15//TRIP13//FBXO5//PRDM1//DEAF1//SPAG6//SRD5A1//CNTFR//CDKL2//FZD10//GATA4//HMGCS1//ARID5B//PTGDR//TP63//PTGS2//STC1//ZBTB16//FEM1B
GO:0043507	positive regulation of JUN kinase activity	Biological process	5	52	467	14742	3.03533	0.0239332	0.547114	1.621	ERCC6//MAP4K1//DBNL//KIAA1804//FZD10
GO:0006081	cellular aldehyde metabolic process	Biological process	4	35	467	14742	3.60771	0.0239639	0.547114	1.62044	ALDH1A3//AKR1C1//BCO2//ALDH3A1
GO:0045682	regulation of epidermis development	Biological process	4	35	467	14742	3.60771	0.0239639	0.547114	1.62044	ERRFI1//TP63//OVOL2//FST
GO:0032319	regulation of Rho GTPase activity	Biological process	7	90	467	14742	2.45525	0.0240002	0.547114	1.61978	CHN1//RICTOR//PLXNB1//ERRFI1//CDKL5//FZD10//RASIP1
GO:0010573	vascular endothelial growth factor production	Biological process	3	20	467	14742	4.73512	0.024119	0.547114	1.61764	NDRG2//GATA4//PTGS2
GO:0010574	regulation of vascular endothelial growth factor production	Biological process	3	20	467	14742	4.73512	0.024119	0.547114	1.61764	GATA4//PTGS2//NDRG2
GO:0042771	DNA damage response, signal transduction by p53 class mediator resulting in induction of apoptosis	Biological process	3	20	467	14742	4.73512	0.024119	0.547114	1.61764	PPP2R5C//TP63//HIPK2
GO:0060445	branching involved in salivary gland morphogenesis	Biological process	3	20	467	14742	4.73512	0.024119	0.547114	1.61764	NRP1//SEMA3A//TGM2
GO:0043065	positive regulation of apoptotic process	Biological process	27	569	467	14742	1.49793	0.0241336	0.547114	1.61738	BNIP3L//CD2//TGM2//TPD52L1//TP63//TNFRSF10A//FEM1B//NOD1//SIVA1//SLAMF7//CASP8//IFI27//RASGRF2//KALRN//MAGED1//CUL1//HIPK2//ERCC6//CADM1//PPP2R5C//SRPK2//ALDH1A3//CCK//INPP5D//PTGS2//ZBTB16//TSC22D1
GO:0006950	response to stress	Biological process	105	2773	467	14742	1.19531	0.024293	0.547814	1.61452	ERCC6//GTF2H1//CCK//ALDH3A1//PRKAA1//RYR1//HIF3A//CLEC7A//MAPK10//NOD1//PELI2//PELI1//ALOX5//S100A9//TAC1//HSP90AA1//HSPB7//YOD1//HERPUD2//CSF3R//CD83//IL6R//ITIH4//DEFB123//CD2//EGF//F13B//GATA4//INPP5D//KIF2A//LAMP2//PDE1A//THBD//TTN//LRP8//RCOR1//PIK3R5//ATRX//FANCE//FANCB//MPG//PAXIP1//TRIP13//MS4A2//CCL13//TNFRSF4//NFKBIZ//AFAP1L2//UMOD//AQP9//TLK2//HIPK2//MDM2//PPP2R5C//PSMA3//TP63//PTGS2//…
GO:0012502	induction of programmed cell death	Biological process	20	391	467	14742	1.6147	0.02448	0.547865	1.61119	BNIP3L//CD2//TGM2//TPD52L1//TP63//TNFRSF10A//FEM1B//NOD1//SIVA1//SLAMF7//CASP8//IFI27//RASGRF2//KALRN//MAGED1//CUL1//HIPK2//ERCC6//CADM1//PPP2R5C
GO:0051384	response to glucocorticoid stimulus	Biological process	9	132	467	14742	2.15233	0.0245524	0.547865	1.60991	STC1//AQP1//ASL//SRD5A1//ALDH3A1//GHR//IL6R//PTGS2//SLC9A3
GO:0008037	cell recognition	Biological process	6	71	467	14742	2.66767	0.0247893	0.550271	1.60574	CLEC7A//NRP1//SEMA3A//CNTN4//ROBO1//CADM1
GO:0050670	regulation of lymphocyte proliferation	Biological process	9	133	467	14742	2.13614	0.0256275	0.564131	1.59129	IKZF3//PRDM1//INPP5D//TNFRSF4//TNFSF13B//PELI1//NCK2//SFTPD//TAC1
GO:0042325	regulation of phosphorylation	Biological process	36	811	467	14742	1.40127	0.0256784	0.564131	1.59043	GTF2H1//CCNK//MAP4K1//EGF//GHR//PRKAA1//MAPK10//NOD1//PELI2//AKTIP//ERRFI1//PRKAG2//PILRB//NCK2//CCK//MS4A2//TNFRSF10A//ERCC6//DBNL//KIAA1804//IL6R//EGFR//TWIST1//GRB10//TPD52L1//PDCD10//UCHL1//FZD10//PIK3R5//TTN//TNFRSF4//LRP8//NRP1//RICTOR//AFAP1L2//PPP1R14A
GO:0017144	drug metabolic process	Biological process	4	36	467	14742	3.50749	0.0263052	0.567509	1.57996	AKR1C1//AKR1C2//DPEP1//FMO3
GO:0046320	regulation of fatty acid oxidation	Biological process	4	36	467	14742	3.50749	0.0263052	0.567509	1.57996	TWIST1//ACSL1//PRKAA1//PRKAG2
GO:0048730	epidermis morphogenesis	Biological process	4	36	467	14742	3.50749	0.0263052	0.567509	1.57996	TP63//DICER1//ERRFI1//KLK14
GO:0032990	cell part morphogenesis	Biological process	29	626	467	14742	1.46239	0.0263648	0.567509	1.57898	CCK//CNTN4//COL6A2//DCX//EGFR//GAS1//GLI3//HSP90AA1//PLXNB1//ROBO1//NCK2//NUMB//NRP1//WASL//SEMA5A//NRXN3//PLXNC1//SEMA3A//EVL//UCHL1//CHN1//KIF5C//CTNNA1//BBS5//CDKL5//KLK8//DICER1//CELSR2//SKIL
GO:0043068	positive regulation of programmed cell death	Biological process	27	574	467	14742	1.48488	0.026585	0.569373	1.57536	BNIP3L//CD2//TGM2//TPD52L1//TP63//TNFRSF10A//FEM1B//NOD1//SIVA1//SLAMF7//CASP8//IFI27//RASGRF2//KALRN//MAGED1//CUL1//HIPK2//ERCC6//CADM1//PPP2R5C//ALDH1A3//CCK//INPP5D//PTGS2//ZBTB16//TSC22D1//SRPK2
GO:0032944	regulation of mononuclear cell proliferation	Biological process	9	134	467	14742	2.1202	0.0267355	0.569734	1.57291	IKZF3//PRDM1//INPP5D//TNFRSF4//TNFSF13B//PELI1//NCK2//SFTPD//TAC1
GO:0061061	muscle structure development	Biological process	20	395	467	14742	1.59835	0.0268927	0.570233	1.57037	TCF12//TWIST1//CSRP3//FXR1//SGCE//USP2//IFRD1//DCN//SKIL//SVIL//TTN//CTNNA1//BOC//PLCB1//ARID5B//RYR1//GATA4//DICER1//CNTFR//ASL
GO:0001893	maternal placenta development	Biological process	3	21	467	14742	4.50964	0.0274929	0.577215	1.56078	PTGS2//STC1//PRDM1
GO:0034698	response to gonadotropin stimulus	Biological process	3	21	467	14742	4.50964	0.0274929	0.577215	1.56078	SRD5A1//GATA4//HMGCS1
GO:0001942	hair follicle development	Biological process	6	73	467	14742	2.59459	0.0279687	0.57864	1.55333	TP63//DICER1//PTGS2//FST//EGFR//NSDHL
GO:0022404	molting cycle process	Biological process	6	73	467	14742	2.59459	0.0279687	0.57864	1.55333	EGFR//NSDHL//TP63//DICER1//PTGS2//FST
GO:0022405	hair cycle process	Biological process	6	73	467	14742	2.59459	0.0279687	0.57864	1.55333	EGFR//NSDHL//TP63//DICER1//PTGS2//FST
GO:0009116	nucleoside metabolic process	Biological process	7	93	467	14742	2.37604	0.0281038	0.57864	1.55123	NT5C3//ENTPD4//PANK1//TYMP//PTGDR//NT5E//NT5M
GO:0033674	positive regulation of kinase activity	Biological process	21	423	467	14742	1.56718	0.0286253	0.584076	1.54325	MAP4K1//EGF//GHR//PRKAA1//MAPK10//NOD1//PILRB//CCK//MS4A2//TNFRSF10A//ERCC6//DBNL//KIAA1804//IL6R//EGFR//TPD52L1//PDCD10//FZD10//LRP8//PRKAG2//AFAP1L2
GO:0001523	retinoid metabolic process	Biological process	4	37	467	14742	3.4127	0.028779	0.584076	1.54092	ALDH1A3//BCO2//AKR1C1//RARRES2
GO:0007405	neuroblast proliferation	Biological process	4	37	467	14742	3.4127	0.028779	0.584076	1.54092	GLI3//CTNNA1//NUMB//ACSL6
GO:0046504	glycerol ether biosynthetic process	Biological process	5	55	467	14742	2.86977	0.0296828	0.599565	1.52749	ACSL1//ACSL3//ACSL6//HSD17B12//ELOVL3
GO:0040011	locomotion	Biological process	47	1123	467	14742	1.32117	0.0299951	0.600939	1.52295	OVOL2//CCK//DCX//CELSR2//CDKL5//TWIST1//ROBO1//IL6R//TYMP//S100A9//CCL13//COL6A2//EGFR//GAS1//GLI3//HSP90AA1//PLXNB1//NCK2//NUMB//NRP1//WASL//SEMA5A//NRXN3//PLXNC1//SEMA3A//EVL//CNTN4//CHN1//KIF5C//TAC1//RARRES2//ARID5B//PTPRK//TNS3//LRP8//LAMA4//SERPINE2//PTP4A1//DPEP1//SFTPD//CD2//INPP5D//THBD//PTGS2//CDK6//PLCB1//JPH3
GO:0050793	regulation of developmental process	Biological process	51	1235	467	14742	1.3036	0.0301415	0.600939	1.52083	GLI3//CTNNA1//PLXNB1//CCL13//WASF3//DICER1//TWIST1//TRPV4//TNMD//EGF//KLK8//ZBTB16//DEAF1//ROBO1//PLCB1//CD83//IKZF3//PRDM1//INPP5D//CD2//HLA-DMA//CDK6//SKIL//GHR//INSIG1//ERRFI1//TP63//OVOL2//RBM15//RCOR1//BOC//NOTCH3//CNTN4//IL6R//AQP1//GATA4//HIPK2//CDKL5//PAXIP1//LAMA4//TNFSF13//USP2//SERPINE2//SEMA3A//NRP1//HES3//NUMB//CHN1//FST//PTGS2//DNM1L
GO:0007519	skeletal muscle tissue development	Biological process	9	137	467	14742	2.07377	0.0302619	0.600939	1.5191	PLCB1//BOC//TWIST1//USP2//RYR1//DCN//SKIL//SVIL//CSRP3
GO:0000904	cell morphogenesis involved in differentiation	Biological process	29	634	467	14742	1.44394	0.0304558	0.600939	1.51633	TNMD//CCK//CNTN4//COL6A2//DCX//EGFR//GAS1//GLI3//HSP90AA1//PLXNB1//ROBO1//NCK2//NUMB//NRP1//WASL//SEMA5A//NRXN3//PLXNC1//SEMA3A//EVL//UCHL1//CHN1//KIF5C//TWIST1//CTNNA1//CDKL5//KLK8//CELSR2//SKIL
GO:0051338	regulation of transferase activity	Biological process	29	634	467	14742	1.44394	0.0304558	0.600939	1.51633	GTF2H1//CCNK//MAP4K1//EGF//GHR//PRKAA1//MAPK10//NOD1//ERRFI1//PRKAG2//PILRB//NCK2//CCK//MS4A2//TNFRSF10A//ERCC6//DBNL//KIAA1804//IL6R//EGFR//TPD52L1//PDCD10//UCHL1//FZD10//PIK3R5//TTN//TNFRSF4//LRP8//AFAP1L2
GO:0048568	embryonic organ development	Biological process	15	277	467	14742	1.70943	0.0309196	0.602576	1.50977	PRDM1//EGFR//ALDH1A3//INSIG1//OTX1//GAS1//TWIST1//GATA4//GLI3//OVOL2//RARRES2//HIPK2//PLK4//FBXW8//NSDHL
GO:0031399	regulation of protein modification process	Biological process	40	932	467	14742	1.35483	0.0309804	0.602576	1.50891	GTF2H1//CCNK//MAP4K1//EGF//GHR//PRKAA1//MAPK10//NOD1//PAXIP1//PELI2//AKTIP//ERRFI1//PRKAG2//PILRB//NCK2//CCK//MS4A2//TNFRSF10A//ERCC6//DBNL//KIAA1804//IL6R//FBXO4//PELI1//EGFR//TWIST1//TPD52L1//PDCD10//UCHL1//FZD10//TTN//TNFRSF4//LRP8//NRP1//RICTOR//PSMA3//FBXO5//CUL1//FEM1B//AFAP1L2
GO:0045884	regulation of survival gene product expression	Biological process	3	22	467	14742	4.30465	0.0311043	0.602576	1.50718	BNIP3L//IL2RB//TNFSF13B
GO:0048596	embryonic camera-type eye morphogenesis	Biological process	3	22	467	14742	4.30465	0.0311043	0.602576	1.50718	ALDH1A3//TWIST1//HIPK2
GO:0008630	DNA damage response, signal transduction resulting in induction of apoptosis	Biological process	4	38	467	14742	3.32289	0.0313862	0.604863	1.50326	PPP2R5C//TP63//HIPK2//ERCC6
GO:0070663	regulation of leukocyte proliferation	Biological process	9	138	467	14742	2.05875	0.0315062	0.604863	1.5016	IKZF3//PRDM1//INPP5D//TNFRSF4//TNFSF13B//PELI1//NCK2//SFTPD//TAC1
GO:0032147	activation of protein kinase activity	Biological process	14	254	467	14742	1.73994	0.0319197	0.607552	1.49594	MAP4K1//EGF//GHR//PRKAA1//MAPK10//NOD1//PILRB//CCK//MS4A2//TNFRSF10A//ERCC6//DBNL//KIAA1804//IL6R
GO:0046649	lymphocyte activation	Biological process	21	428	467	14742	1.54887	0.0319314	0.607552	1.49578	CD2//IL21R//SLAMF7//IKZF3//PRDM1//INPP5D//TNFRSF4//TNFSF13B//PELI1//HLA-DMA//MAPKAP1//RICTOR//ZFP36L1//GLI3//NCK2//CLEC7A//SFTPD//CD83//PAXIP1//TNFSF13//TAC1
GO:0007173	epidermal growth factor receptor signaling pathway	Biological process	10	161	467	14742	1.96071	0.0323706	0.613022	1.48985	EGF//ERRFI1//NCK2//EGFR//AFAP1L2//MDM2//PDE1A//ERBB2IP//MAPKAP1//RICTOR
GO:0042303	molting cycle	Biological process	6	76	467	14742	2.49217	0.0332236	0.613022	1.47855	EGFR//NSDHL//TP63//DICER1//PTGS2//FST
GO:0042633	hair cycle	Biological process	6	76	467	14742	2.49217	0.0332236	0.613022	1.47855	EGFR//NSDHL//TP63//DICER1//PTGS2//FST
GO:0010942	positive regulation of cell death	Biological process	27	586	467	14742	1.45447	0.0332528	0.613022	1.47817	BNIP3L//CD2//TGM2//TPD52L1//TP63//TNFRSF10A//FEM1B//NOD1//SIVA1//SLAMF7//CASP8//IFI27//RASGRF2//KALRN//MAGED1//CUL1//HIPK2//ERCC6//CADM1//PPP2R5C//ALDH1A3//CCK//INPP5D//PTGS2//ZBTB16//TSC22D1//SRPK2
GO:0014070	response to organic cyclic compound	Biological process	12	208	467	14742	1.8212	0.0333985	0.613022	1.47627	HMGCS1//RYR1//SLC22A6//GHR//TAC1//SRD5A1//ALDH3A1//CTNNA1//ACSL3//PTGS2//STC1//CD83
GO:0048732	gland development	Biological process	14	256	467	14742	1.72635	0.0337783	0.613022	1.47136	EGFR//ALDH1A3//SRD5A1//ARID5B//TP63//GLI3//DEAF1//ROBO1//FEM1B//TGM2//ELF5//NRP1//SEMA3A//EGF
GO:0048585	negative regulation of response to stimulus	Biological process	29	640	467	14742	1.4304	0.0338317	0.613022	1.47068	PXDN//ERRFI1//INPP5D//TWIST1//KLK14//GRB10//SKIL//PEG10//HIPK2//PRDM1//PRKAA1//PYY//CCK//FST//EGF//EGFR//ZMYND11//MDM2//OVOL2//GAS1//GLI3//PPP2CB//KLK8//NRP1//SEMA3A//NT5E//ROBO1//NDRG2//CDK6
GO:0060349	bone morphogenesis	Biological process	5	57	467	14742	2.76907	0.0339601	0.613022	1.46903	COL13A1//GHR//INSIG1//TWIST1//GLI3
GO:0010720	positive regulation of cell development	Biological process	9	140	467	14742	2.02934	0.0341008	0.613022	1.46724	GLI3//TWIST1//DICER1//CDKL5//SERPINE2//NUMB//PLXNB1//ROBO1//SKIL
GO:0048661	positive regulation of smooth muscle cell proliferation	Biological process	4	39	467	14742	3.23769	0.0341279	0.613022	1.46689	IL6R//NOTCH3//PTGS2//TGM2
GO:0048666	neuron development	Biological process	32	721	467	14742	1.40105	0.0342104	0.613022	1.46584	CCK//CNTN4//COL6A2//DCX//EGFR//GAS1//GLI3//HSP90AA1//PLXNB1//ROBO1//NCK2//NUMB//NRP1//WASL//SEMA5A//NRXN3//PLXNC1//SEMA3A//EVL//UCHL1//CHN1//KIF5C//TRPV4//CTNNA1//EFHD1//RP1//DLG2//CDKL5//KLK8//DICER1//CELSR2//SKIL
GO:0045619	regulation of lymphocyte differentiation	Biological process	7	97	467	14742	2.27806	0.0342803	0.613022	1.46496	CD83//IKZF3//PRDM1//INPP5D//CD2//HLA-DMA//GLI3
GO:0051347	positive regulation of transferase activity	Biological process	21	432	467	14742	1.53453	0.0347765	0.613022	1.45871	MAP4K1//EGF//GHR//PRKAA1//MAPK10//NOD1//PILRB//CCK//MS4A2//TNFRSF10A//ERCC6//DBNL//KIAA1804//IL6R//EGFR//TPD52L1//PDCD10//FZD10//LRP8//PRKAG2//AFAP1L2
GO:0007176	regulation of epidermal growth factor-activated receptor activity	Biological process	3	23	467	14742	4.11749	0.0349517	0.613022	1.45653	EGF//ERRFI1//NCK2
GO:0032094	response to food	Biological process	3	23	467	14742	4.11749	0.0349517	0.613022	1.45653	PYY//CCK//GHR
GO:0045604	regulation of epidermal cell differentiation	Biological process	3	23	467	14742	4.11749	0.0349517	0.613022	1.45653	ERRFI1//TP63//OVOL2
GO:0048536	spleen development	Biological process	3	23	467	14742	4.11749	0.0349517	0.613022	1.45653	SLC40A1//DICER1//RBM15
GO:0060571	morphogenesis of an epithelial fold	Biological process	3	23	467	14742	4.11749	0.0349517	0.613022	1.45653	OVOL2//TP63//EGFR
GO:0070231	T cell apoptosis	Biological process	3	23	467	14742	4.11749	0.0349517	0.613022	1.45653	SIVA1//TNFRSF4//GLI3
GO:0051094	positive regulation of developmental process	Biological process	27	589	467	14742	1.44706	0.0351029	0.613151	1.45466	GLI3//TWIST1//DICER1//ZBTB16//PLCB1//CD83//PRDM1//INPP5D//HLA-DMA//GHR//RCOR1//BOC//IL6R//AQP1//GATA4//HIPK2//CDKL5//USP2//SERPINE2//NUMB//PLXNB1//ROBO1//SKIL//CTNNA1//FST//PTGS2//DNM1L
GO:0050730	regulation of peptidyl-tyrosine phosphorylation	Biological process	8	119	467	14742	2.12218	0.0354141	0.614209	1.45082	IL6R//GHR//CCK//NRP1//RICTOR//ERRFI1//EGF//EGFR
GO:0031960	response to corticosteroid stimulus	Biological process	9	141	467	14742	2.01494	0.0354518	0.614209	1.45036	ALDH3A1//GHR//IL6R//PTGS2//SLC9A3//STC1//AQP1//ASL//SRD5A1
GO:0030326	embryonic limb morphogenesis	Biological process	7	98	467	14742	2.25482	0.0359545	0.614733	1.44425	TWIST1//ZBTB16//DICER1//GAS1//GLI3//TP63//SP9
GO:0035113	embryonic appendage morphogenesis	Biological process	7	98	467	14742	2.25482	0.0359545	0.614733	1.44425	TP63//SP9//TWIST1//ZBTB16//DICER1//GAS1//GLI3
GO:0006935	chemotaxis	Biological process	26	565	467	14742	1.45266	0.0366809	0.614733	1.43556	IL6R//COL6A2//DCX//EGFR//GAS1//GLI3//HSP90AA1//PLXNB1//ROBO1//NCK2//NUMB//NRP1//WASL//SEMA5A//NRXN3//PLXNC1//SEMA3A//EVL//CNTN4//CHN1//KIF5C//RARRES2//S100A9//CCL13//SFTPD//TYMP
GO:0042330	taxis	Biological process	26	565	467	14742	1.45266	0.0366809	0.614733	1.43556	IL6R//TYMP//S100A9//CCL13//COL6A2//DCX//EGFR//GAS1//GLI3//HSP90AA1//PLXNB1//ROBO1//NCK2//NUMB//NRP1//WASL//SEMA5A//NRXN3//PLXNC1//SEMA3A//EVL//CNTN4//CHN1//KIF5C//RARRES2//SFTPD
GO:0046128	purine ribonucleoside metabolic process	Biological process	4	40	467	14742	3.15675	0.0370044	0.614733	1.43175	PANK1//PTGDR//NT5C3//NT5E
GO:0046677	response to antibiotic	Biological process	4	40	467	14742	3.15675	0.0370044	0.614733	1.43175	CASP8//MDM2//PPP2CB//SKIL
GO:0071900	regulation of protein serine/threonine kinase activity	Biological process	17	334	467	14742	1.60673	0.0376015	0.614733	1.4248	GTF2H1//CCNK//GHR//PRKAA1//MAPK10//NOD1//TNFRSF10A//ERCC6//MAP4K1//DBNL//KIAA1804//EGFR//EGF//TPD52L1//PDCD10//UCHL1//FZD10
GO:0006107	oxaloacetate metabolic process	Biological process	2	10	467	14742	6.31349	0.0380783	0.614733	1.41932	GHR//PC
GO:0009185	ribonucleoside diphosphate metabolic process	Biological process	2	10	467	14742	6.31349	0.0380783	0.614733	1.41932	ENTPD4//NUDT9
GO:0031641	regulation of myelination	Biological process	2	10	467	14742	6.31349	0.0380783	0.614733	1.41932	KLK8//DICER1
GO:0032096	negative regulation of response to food	Biological process	2	10	467	14742	6.31349	0.0380783	0.614733	1.41932	CCK//PYY
GO:0043518	negative regulation of DNA damage response, signal transduction by p53 class mediator	Biological process	2	10	467	14742	6.31349	0.0380783	0.614733	1.41932	MDM2//TWIST1
GO:0045579	positive regulation of B cell differentiation	Biological process	2	10	467	14742	6.31349	0.0380783	0.614733	1.41932	PRDM1//INPP5D
GO:0060900	embryonic camera-type eye formation	Biological process	2	10	467	14742	6.31349	0.0380783	0.614733	1.41932	ALDH1A3//TWIST1
GO:0070977	bone maturation	Biological process	2	10	467	14742	6.31349	0.0380783	0.614733	1.41932	PLXNB1//RYR1
GO:0071470	cellular response to osmotic stress	Biological process	2	10	467	14742	6.31349	0.0380783	0.614733	1.41932	TRPV4//AQP1
GO:0071731	response to nitric oxide	Biological process	2	10	467	14742	6.31349	0.0380783	0.614733	1.41932	AQP1//DPEP1
GO:2000772	regulation of cellular senescence	Biological process	2	10	467	14742	6.31349	0.0380783	0.614733	1.41932	CDK6//TWIST1
GO:0001819	positive regulation of cytokine production	Biological process	10	166	467	14742	1.90165	0.0386714	0.621953	1.41261	GATA4//PTGS2//IL6R//CD83//PLCB1//NOD1//AFAP1L2//TWIST1//CLEC7A//PELI1
GO:0010165	response to X-ray	Biological process	3	24	467	14742	3.94593	0.0390327	0.623061	1.40857	ERCC6//THBD//TP63
GO:0043603	cellular amide metabolic process	Biological process	3	24	467	14742	3.94593	0.0390327	0.623061	1.40857	ASL//GHR//DPEP1
GO:0032102	negative regulation of response to external stimulus	Biological process	7	100	467	14742	2.20972	0.039463	0.627579	1.40381	PYY//CCK//KLK8//NRP1//SEMA3A//NT5E//ROBO1
GO:0002260	lymphocyte homeostasis	Biological process	4	41	467	14742	3.07975	0.0400163	0.631051	1.39776	TNFSF13B//SIVA1//SKIL//SLC40A1
GO:0001932	regulation of protein phosphorylation	Biological process	33	758	467	14742	1.37431	0.0400293	0.631051	1.39762	GTF2H1//CCNK//MAP4K1//EGF//GHR//PRKAA1//MAPK10//NOD1//PELI2//AKTIP//ERRFI1//PRKAG2//PILRB//NCK2//CCK//MS4A2//TNFRSF10A//ERCC6//DBNL//KIAA1804//IL6R//EGFR//TWIST1//TPD52L1//PDCD10//UCHL1//FZD10//TTN//TNFRSF4//LRP8//NRP1//RICTOR//AFAP1L2
GO:0000187	activation of MAPK activity	Biological process	8	122	467	14742	2.07	0.0401255	0.631051	1.39658	ERCC6//MAP4K1//DBNL//KIAA1804//GHR//PRKAA1//MAPK10//NOD1
GO:0032675	regulation of interleukin-6 production	Biological process	5	60	467	14742	2.63062	0.0410595	0.643366	1.38659	IL6R//NOD1//INPP5D//TWIST1//AFAP1L2
GO:0031667	response to nutrient levels	Biological process	17	338	467	14742	1.58771	0.0413092	0.6448	1.38395	ALDH3A1//ALOX5//ASL//ENSA//ACSL3//STC1//SRD5A1//PRKAA1//GHR//PYY//CCK//GATA4//MEST//HMGCS1//PTGS2//AQP1//FZD10
GO:0016477	cell migration	Biological process	32	734	467	14742	1.37624	0.042039	0.6448	1.37635	OVOL2//CCK//DCX//CELSR2//CDKL5//TWIST1//ROBO1//IL6R//NRP1//SEMA3A//TAC1//RARRES2//ARID5B//EGFR//GLI3//LRP8//LAMA4//SERPINE2//PTP4A1//DPEP1//PTPRK//S100A9//CCL13//SFTPD//CD2//INPP5D//THBD//PTGS2//PLCB1//PLXNB1//NCK2//TNS3
GO:0002684	positive regulation of immune system process	Biological process	24	520	467	14742	1.45696	0.0422853	0.6448	1.37381	CLEC7A//MAPK10//NOD1//PELI2//PELI1//TNFSF13//TNFSF13B//IL6R//RARRES2//HLA-DMA//INPP5D//CD2//TNFRSF4//MAPKAP1//RICTOR//NCK2//CADM1//MS4A2//CD83//PRDM1//PAXIP1//GLI3//TAC1//CASP8
GO:0008610	lipid biosynthetic process	Biological process	23	494	467	14742	1.46974	0.0425275	0.6448	1.37133	PTGS2//B4GALNT1//ACSL3//PRKAA1//ELOVL3//FABP5//PTDSS2//LSS//HSD17B12//CYP51A1//DHCR7//HMGCS1//INSIG1//MVD//TM7SF2//NSDHL//SRD5A1//PRKAG2//ALOX5//ACSL1//ACSL6//PC//ACSS2
GO:0019079	viral genome replication	Biological process	4	42	467	14742	3.00642	0.0431636	0.6448	1.36488	DICER1//SRPK2//OAS1//NFIA
GO:0035272	exocrine system development	Biological process	4	42	467	14742	3.00642	0.0431636	0.6448	1.36488	EGFR//TGM2//NRP1//SEMA3A
GO:0035116	embryonic hindlimb morphogenesis	Biological process	3	25	467	14742	3.78809	0.0433443	0.6448	1.36307	TWIST1//ZBTB16//DICER1
GO:0048485	sympathetic nervous system development	Biological process	3	25	467	14742	3.78809	0.0433443	0.6448	1.36307	TP63//NRP1//SEMA3A
GO:0048521	negative regulation of behavior	Biological process	3	25	467	14742	3.78809	0.0433443	0.6448	1.36307	NRP1//SEMA3A//ROBO1
GO:0050873	brown fat cell differentiation	Biological process	3	25	467	14742	3.78809	0.0433443	0.6448	1.36307	PTGS2//LAMA4//RARRES2
GO:0061383	trabecula morphogenesis	Biological process	3	25	467	14742	3.78809	0.0433443	0.6448	1.36307	SLC40A1//OVOL2//PLXNB1
GO:0045621	positive regulation of lymphocyte differentiation	Biological process	5	61	467	14742	2.5875	0.0436107	0.6448	1.36041	CD83//PRDM1//INPP5D//HLA-DMA//GLI3
GO:0080134	regulation of response to stress	Biological process	28	630	467	14742	1.403	0.0449017	0.6448	1.34774	CLEC7A//MAPK10//NOD1//PELI2//PELI1//TAC1//ERCC6//MAP4K1//DBNL//KIAA1804//THBD//SERPINE2//PTGS2//CADM1//FZD10//MDM2//TWIST1//EGFR//ZMYND11//TPD52L1//PLCB1//HIPK2//KLK8//NT5E//TGM2//CASP8//FEM1B//CDK6
GO:0007266	Rho protein signal transduction	Biological process	11	194	467	14742	1.78991	0.0450101	0.6448	1.34669	RASGRF2//KALRN//PLEKHG6//SLC26A10
GO:0048646	anatomical structure formation involved in morphogenesis	Biological process	31	712	467	14742	1.37443	0.0455376	0.6448	1.34163	CASP8//TYMP//EGF//SRPK2//NRXN3//PDCD10//DICER1//RASIP1//OVOL2//NRP1//SEMA5A//RBM15//GATA4//PCDH8//SKIL//TWIST1//DEAF1//ROBO1//ALDH1A3//HIPK2//TNMD//LRP8//TTN//BBS5//AQP1//SLC40A1//TP63//GLI3//TGM2//NOTCH3//PTGS2
GO:0006067	ethanol metabolic process	Biological process	2	11	467	14742	5.73954	0.0455823	0.6448	1.3412	ADH6//ACSS2
GO:0006069	ethanol oxidation	Biological process	2	11	467	14742	5.73954	0.0455823	0.6448	1.3412	ADH6//ACSS2
GO:0007130	synaptonemal complex assembly	Biological process	2	11	467	14742	5.73954	0.0455823	0.6448	1.3412	TRIP13//STAG3
GO:0007143	female meiosis	Biological process	2	11	467	14742	5.73954	0.0455823	0.6448	1.3412	FBXO5//TRIP13
GO:0010837	regulation of keratinocyte proliferation	Biological process	2	11	467	14742	5.73954	0.0455823	0.6448	1.3412	PTPRK//OVOL2
GO:0010955	negative regulation of protein processing	Biological process	2	11	467	14742	5.73954	0.0455823	0.6448	1.3412	SERPINE2//GAS1
GO:0030889	negative regulation of B cell proliferation	Biological process	2	11	467	14742	5.73954	0.0455823	0.6448	1.3412	PRDM1//INPP5D
GO:0033599	regulation of mammary gland epithelial cell proliferation	Biological process	2	11	467	14742	5.73954	0.0455823	0.6448	1.3412	ROBO1//DEAF1
GO:0042976	activation of Janus kinase activity	Biological process	2	11	467	14742	5.73954	0.0455823	0.6448	1.3412	IL6R//GHR
GO:0045540	regulation of cholesterol biosynthetic process	Biological process	2	11	467	14742	5.73954	0.0455823	0.6448	1.3412	PRKAA1//DHCR7
GO:0045830	positive regulation of isotype switching	Biological process	2	11	467	14742	5.73954	0.0455823	0.6448	1.3412	TNFSF13//PAXIP1
GO:0048305	immunoglobulin secretion	Biological process	2	11	467	14742	5.73954	0.0455823	0.6448	1.3412	TNFRSF4//TNFSF13B
GO:0048841	regulation of axon extension involved in axon guidance	Biological process	2	11	467	14742	5.73954	0.0455823	0.6448	1.3412	NRP1//SEMA3A
GO:0009628	response to abiotic stimulus	Biological process	25	551	467	14742	1.43228	0.045864	0.6448	1.33853	DCN//TRPV4//AQP9//OPN5//RP1//HVCN1//HSPB7//CASP8//GMPR//ERCC6//PER1//TAC1//NPFFR2//HMGCS1//NMU//THBD//TP63//PAXIP1//IL6R//AQP1//TNFRSF10A//PTPRK//LXN//DCX//EGFR
GO:0032635	interleukin-6 production	Biological process	5	62	467	14742	2.54576	0.046255	0.6448	1.33484	AFAP1L2//IL6R//NOD1//INPP5D//TWIST1
GO:0046209	nitric oxide metabolic process	Biological process	5	62	467	14742	2.54576	0.046255	0.6448	1.33484	EGFR//HSP90AA1//PTGS2//WASL//NOSTRIN
GO:0051403	stress-activated MAPK cascade	Biological process	11	195	467	14742	1.78073	0.0464083	0.6448	1.3334	MAPK10//NOD1//ERCC6//MAP4K1//DBNL//KIAA1804//FZD10//ZMYND11//TPD52L1//PLCB1//HIPK2
GO:0001776	leukocyte homeostasis	Biological process	4	43	467	14742	2.93651	0.0464462	0.6448	1.33305	TNFSF13B//SKIL//SLC40A1//SIVA1
GO:0042278	purine nucleoside metabolic process	Biological process	4	43	467	14742	2.93651	0.0464462	0.6448	1.33305	PANK1//PTGDR//NT5C3//NT5E
GO:0061097	regulation of protein tyrosine kinase activity	Biological process	4	43	467	14742	2.93651	0.0464462	0.6448	1.33305	EGF//ERRFI1//NCK2//AFAP1L2
GO:0048583	regulation of response to stimulus	Biological process	79	2080	467	14742	1.19896	0.0467394	0.646765	1.33032	GHR//PRKAA1//MAPK10//NOD1//PXDN//CLEC7A//PELI2//PELI1//TNFSF13//TNFSF13B//TAC1//IL6R//EGF//ERRFI1//NCK2//TNFRSF10A//ERCC6//MAP4K1//DBNL//KIAA1804//PLCB1//GAS1//INPP5D//THBD//RARRES2//TWIST1//PLXNB1//KLK14//HLA-DMA//GRB10//SERPINE2//HIPK2//SKIL//PEG10//GATA4//PTGS2//PRDM1//RICTOR//IQSEC3//PYY//CCK//CHN1//RASIP1//CDKL5//FZD10//FST//RASGRF2//KALRN//PLEKHG6//SLC26A10//EGFR//CADM1//CASP8//TGM2//TMED4/…
GO:0023051	regulation of signaling	Biological process	69	1789	467	14742	1.21753	0.0470344	0.648739	1.32758	GHR//PRKAA1//MAPK10//NOD1//PXDN//EGF//ERRFI1//NCK2//TNFRSF10A//ERCC6//MAP4K1//DBNL//KIAA1804//MTNR1B//PLCB1//GAS1//INPP5D//IL6R//TWIST1//PLXNB1//KLK14//FST//NMU//GRB10//HIPK2//SKIL//PEG10//GATA4//KLK8//DICER1//PRDM1//PTGS2//RICTOR//IQSEC3//TAC1//CHN1//RASIP1//CDKL5//FZD10//PELI1//RASGRF2//KALRN//PLEKHG6//SLC26A10//EGFR//CASP8//TGM2//PELI2//TMED4//ZMYND11//TPD52L1//PDCD10//UCHL1//MDM2//AFAP1L2//OV…
GO:0050767	regulation of neurogenesis	Biological process	17	344	467	14742	1.56002	0.047355	0.649929	1.32463	GLI3//CTNNA1//DICER1//TRPV4//NOTCH3//CNTN4//CDKL5//KLK8//SERPINE2//ROBO1//SEMA3A//NRP1//NUMB//CHN1//PLXNB1//SKIL//HES3
GO:0048522	positive regulation of cellular process	Biological process	104	2821	467	14742	1.16378	0.047432	0.649929	1.32393	PAXIP1//PELI2//AKTIP//NRP1//CDK6//GLI3//GAS1//TP63//IL6R//EGF//BNIP3L//CD2//TGM2//TPD52L1//TNFRSF10A//FEM1B//NOD1//SIVA1//MDM2//PPP2R5C//PSMA3//RBM15//SLAMF7//ERCC6//ALDH3A1//CCK//CNTFR//AKR1C2//EGFR//MVD//TSPAN31//SRPK2//TNFSF13//TSC22D1//TNFSF13B//PDCD10//HIPK2//TNS3//CASP8//IFI27//RASGRF2//KALRN//MAGED1//CUL1//PRKAA1//P2RX2//TAC1//TWIST1//RARRES2//PRKAG2//HSD17B12//DICER1//PLXNB1//RUNX2//ETS2/…
GO:0021532	neural tube patterning	Biological process	3	26	467	14742	3.6424	0.0478831	0.649929	1.31982	HES3//GAS1//GLI3
GO:0034644	cellular response to UV	Biological process	3	26	467	14742	3.6424	0.0478831	0.649929	1.31982	AQP1//PTPRK//TP63
GO:0048048	embryonic eye morphogenesis	Biological process	3	26	467	14742	3.6424	0.0478831	0.649929	1.31982	ALDH1A3//HIPK2//TWIST1
GO:0048699	generation of neurons	Biological process	40	964	467	14742	1.30985	0.0482141	0.652344	1.31683	CCK//DCX//CELSR2//CDKL5//TWIST1//GLI3//ACSL6//CTNNA1//CNTN4//COL6A2//EGFR//GAS1//HSP90AA1//PLXNB1//ROBO1//NCK2//NUMB//NRP1//WASL//SEMA5A//NRXN3//PLXNC1//SEMA3A//EVL//UCHL1//CHN1//KIF5C//DICER1//TRPV4//FZD10//HIPK2//EFHD1//RP1//DLG2//NOTCH3//KLK8//SERPINE2//HES3//SKIL//CDK6
GO:0008285	negative regulation of cell proliferation	Biological process	22	475	467	14742	1.46207	0.0487699	0.656625	1.31185	TNMD//CTNNA1//DICER1//PTPRK//PRDM1//INPP5D//ROBO1//PLXNB1//SFTPD//NDRG2//CDK6//GAS1//MAGED1//GLI3//PPP2R5C//PTGS2//UMOD//ZBTB16//NCK2//CUL1//MYO16//OVOL2
GO:0007224	smoothened signaling pathway	Biological process	5	63	467	14742	2.50535	0.0489927	0.656625	1.30987	GAS1//GLI3//CTNNA1//HIPK2//NSDHL
GO:0048660	regulation of smooth muscle cell proliferation	Biological process	5	63	467	14742	2.50535	0.0489927	0.656625	1.30987	IL6R//NOTCH3//PTGS2//TGM2//NDRG2
GO:0031646	positive regulation of neurological system process	Biological process	4	44	467	14742	2.86977	0.0498639	0.657956	1.30221	DICER1//TAC1//NMU//PTGS2
GO:0032768	regulation of monooxygenase activity	Biological process	4	44	467	14742	2.86977	0.0498639	0.657956	1.30221	EGFR//HSP90AA1//WASL//NOSTRIN
GO:0048483	autonomic nervous system development	Biological process	4	44	467	14742	2.86977	0.0498639	0.657956	1.30221	HES3//TP63//NRP1//SEMA3A
GO:0048641	regulation of skeletal muscle tissue development	Biological process	4	44	467	14742	2.86977	0.0498639	0.657956	1.30221	PLCB1//BOC//TWIST1//USP2
GO:0050772	positive regulation of axonogenesis	Biological process	4	44	467	14742	2.86977	0.0498639	0.657956	1.30221	CDKL5//PLXNB1//ROBO1//SKIL

## Sheet: down-CC
#Column "GO.ID" stands for the ID of gene ontology term
#Column "Term" stands for the name of gene ontology term
#Column "Ontology" stands for the ontology of GOID belongs to
#Column "Count" stands for the number of DE genes associated with the listed GOID
#Column "Pop.Hits" stands for the number of background population genes associated with the listed GOID
#Column "List.Total" stands for the total number of DE genes
#Column "Pop.Total" stands for the total number of background population genes
#Column "Fold.Enrichment" stands for the Fold Enrichment value of the GOID, it equals (Count/Pop.Hits)/(List.Total/Pop.Total)
#Column "Pvalue" stands for the significance testing value of the GOID
#Column "FDR" stands for the false discovery rate of the GOID, using Benjamini & Hochberg (1995) method
#Column "Enrichment.Score" stands for the Enrichment Score value of the GOID, it equals (-log10(Pvalue))
#Column "GENES" stands for the DE genes associated with the GOID
GO.ID	Term	Ontology	Count	Pop.Hits	List.Total	Pop.Total	Fold.Enrichment	Pvalue	FDR	Enrichment.Score	GENES
GO:0071944	cell periphery	Cellular component	173	4298	503	16875	1.35038	3.80479e-06	0.00148416	5.41967	ANXA13//AQP1//AQP9//CD2//CDH6//CEACAM7//ABCC2//CNTFR//COL13A1//CPE//CSF3R//CTNNA1//DLG2//DPEP1//DSC2//EGF//CELSR2//EGFR//FOLR1//GABRB2//B4GALNT1//GAS1//GHR//GNG11//GPR18//GRB10//GRIA1//GRIK5//HLA-DMA//HSP90AA1//IL2RB//IL6R//INPP5D//ITIH4//KCNQ1//LAMP2//ADAM11//MDM2//MTNR1B//NOTCH3//NT5E//ROR1//OR1F1//PCDH8//PLXNB1//MAPK10//PTGDR//PTPRK//RASGRF2//RIT2//ROBO1//RYR1//S100A9//SCNN1A//SLC9A3//SLC10A2/…
GO:0005886	plasma membrane	Cellular component	170	4229	503	16875	1.34861	5.32911e-06	0.00148416	5.27335	GNG11//GNG13//HLA-DMA//CD2//GAS1//AQP1//AQP9//CEACAM4//ABCC2//CSF3R//MS4A2//FOLR1//GABRB2//GHR//IL2RB//MTNR1B//ROR1//PCDH8//FXYD3//PLXNB1//PTPRK//RHD//ROBO1//RYR1//TSPAN31//SLC10A2//THBD//TM7SF2//TNFRSF4//SLC30A3//OR1E2//NUMB//SLC4A4//SGCE//SYNGR1//SLC28A1//CD83//SLC22A6//NRXN3//GPC6//SLC12A7//NPFFR2//FZD10//PILRB//SLC40A1//PCDHB2//IL6R//PTGS2//LRP8//EGFR//CTNNA1//CLDN12//CLDN10//EVL//TRPV4//AFAP…
GO:0016020	membrane	Cellular component	271	7703	503	16875	1.18028	0.000104455	0.0193938	3.98107	ANXA13//AQP1//AQP9//CD2//CDH6//CEACAM7//ABCC2//CNTFR//COL13A1//CPE//CSF3R//CTNNA1//DLG2//DPEP1//DSC2//EGF//CELSR2//EGFR//FOLR1//GABRB2//B4GALNT1//GAS1//GHR//GNG11//GPR18//GRB10//GRIA1//GRIK5//HLA-DMA//HSP90AA1//IL2RB//IL6R//INPP5D//ITIH4//KCNQ1//LAMP2//ADAM11//MDM2//MTNR1B//NOTCH3//NT5E//ROR1//OR1F1//PCDH8//PLXNB1//MAPK10//PTGDR//PTPRK//RASGRF2//RIT2//ROBO1//RYR1//S100A9//SCNN1A//SLC9A3//SLC10A2/…
GO:0042598	vesicular fraction	Cellular component	18	275	503	16875	2.19592	0.00157188	0.180283	2.80358	AQP9//CYP51A1//DHCR7//ACSL1//ACSL3//FMO3//GUSB//LSS//OAS1//FXYD3//PTGS2//SRD5A1//TM7SF2//H6PD//ACSL6//APPL1//JPH3//STEAP2
GO:0000267	cell fraction	Cellular component	53	1177	503	16875	1.51069	0.00171591	0.180283	2.76551	CEACAM4//ABCC2//DLG2//ENO3//FOLR1//GABRB2//B4GALNT1//GRIA1//LAMP2//NT5E//RYR1//TSPAN31//SCNN1A//SLC30A3//SLC28A1//SLC22A6//MYO16//PLCB1//SLC47A1//MCTP1//ART5//ALOX5//EGF//ERCC6//GUSB//HMGCS1//INPP5D//MVD//PC//PDE4D//PYY//RP1//TPP2//TNFSF13B//MDM2//AQP9//CYP51A1//DHCR7//ACSL1//ACSL3//FMO3//LSS//OAS1//FXYD3//PTGS2//SRD5A1//TM7SF2//H6PD//ACSL6//APPL1//JPH3//GRIK5//STEAP2
GO:0044425	membrane part	Cellular component	216	6197	503	16875	1.16936	0.00207855	0.180283	2.68224	GNG11//GNG13//HLA-DMA//AQP9//ATP5G3//BNIP3L//CD2//CDH6//CEACAM7//COL13A1//CYP51A1//DHCR7//DSC2//EGF//CELSR2//EGFR//ACSL1//ACSL3//FMO3//B4GALNT1//GAS1//GHR//GPR18//GRIA1//GRIK5//IFI27//IL6R//INSIG1//LAMP2//ADAM11//MEST//NDUFB1//NOTCH3//OR1F1//PPP2R5C//PTGDR//PTPRK//RHD//SCNN1A//SLC9A3//SRD5A1//LRP8//IL1R2//ST7//DYSF//TNFRSF10A//NRP1//SEMA5A//CLDN12//CLDN10//NRXN3//SLC25A27//ENTPD4//PCDHGA8//ARMCX2…
GO:0005626	insoluble fraction	Cellular component	42	891	503	16875	1.58142	0.00226568	0.180283	2.6448	CEACAM4//ABCC2//DLG2//ENO3//FOLR1//GABRB2//B4GALNT1//GRIA1//LAMP2//NT5E//RYR1//TSPAN31//SCNN1A//SLC30A3//SLC28A1//SLC22A6//MYO16//PLCB1//SLC47A1//MCTP1//ART5//AQP9//CYP51A1//DHCR7//ACSL1//ACSL3//FMO3//GUSB//LSS//OAS1//FXYD3//PTGS2//SRD5A1//TM7SF2//H6PD//ACSL6//APPL1//JPH3//GRIK5//STEAP2//MDM2//PDE4D
GO:0005792	microsome	Cellular component	17	270	503	16875	2.11233	0.00313503	0.207647	2.50376	AQP9//CYP51A1//DHCR7//ACSL1//ACSL3//FMO3//GUSB//LSS//OAS1//FXYD3//PTGS2//SRD5A1//TM7SF2//H6PD//ACSL6//APPL1//JPH3
GO:0005624	membrane fraction	Cellular component	40	860	503	16875	1.56041	0.00360822	0.207647	2.44271	AQP9//CYP51A1//DHCR7//ACSL1//ACSL3//FMO3//GUSB//LSS//OAS1//FXYD3//PTGS2//SRD5A1//TM7SF2//H6PD//ACSL6//APPL1//JPH3//GRIK5//STEAP2//CEACAM4//ABCC2//DLG2//ENO3//FOLR1//GABRB2//B4GALNT1//GRIA1//LAMP2//NT5E//RYR1//TSPAN31//SCNN1A//SLC30A3//SLC28A1//SLC22A6//MYO16//PLCB1//SLC47A1//MCTP1//ART5
GO:0031225	anchored to membrane	Cellular component	11	143	503	16875	2.58067	0.00372795	0.207647	2.42853	CD2//GAS1//CEACAM7//CNTFR//DPEP1//FOLR1//NT5E//UMOD//GPC6//MSLN//CNTN4
GO:0031224	intrinsic to membrane	Cellular component	189	5423	503	16875	1.16922	0.00501093	0.239494	2.30008	AQP9//ATP5G3//BNIP3L//CD2//CDH6//CEACAM7//COL13A1//CYP51A1//DHCR7//DSC2//EGF//CELSR2//EGFR//ACSL1//ACSL3//FMO3//B4GALNT1//GAS1//GHR//GPR18//GRIA1//GRIK5//HLA-DMA//IFI27//IL6R//INSIG1//LAMP2//ADAM11//MEST//NDUFB1//NOTCH3//OR1F1//PPP2R5C//PTGDR//PTPRK//RHD//SCNN1A//SLC9A3//SRD5A1//LRP8//IL1R2//ST7//DYSF//TNFRSF10A//NRP1//SEMA5A//CLDN12//CLDN10//NRXN3//SLC25A27//ENTPD4//PCDHGA8//ARMCX2//TSPAN32//UST…
GO:0019005	SCF ubiquitin ligase complex	Cellular component	4	24	503	16875	5.59145	0.00515965	0.239494	2.28738	CUL1//FBXW8//FBXO25//FBXO4
GO:0030666	endocytic vesicle membrane	Cellular component	7	73	503	16875	3.217	0.00599279	0.24917	2.22237	EGFR//LAMP2//SEC61G//GRIA1//MDM2//WASL//NOSTRIN
GO:0016323	basolateral plasma membrane	Cellular component	16	267	503	16875	2.01041	0.00653263	0.24917	2.18491	EVL//TRPV4//AFAP1//TNS3//AQP1//ERBB2IP//AQP9//EGFR//IL6R//KCNQ1//NAIP//UMOD//SLC4A4//SLC22A6//NOD1//CADM1
GO:0012505	endomembrane system	Cellular component	66	1635	503	16875	1.35426	0.00671013	0.24917	2.17327	CBFA2T3//EGFR//B4GALNT1//WASL//ENTPD4//UST//PDCD10//COPZ2//STEAP4//ALOX5//BNIP3L//CBX3//DHCR7//POM121C//CYP51A1//ACSL1//ACSL3//FMO3//GRIA1//INSIG1//LSS//MEST//FXYD3//PTGS2//RASGRF2//SRD5A1//TM7SF2//UCHL1//MARCH6//ACSL6//SEC61G//NSDHL//HSD17B12//P4HTM//BCAP29//JPH3//PTDSS2//ELOVL3//LRRC8C//DERL3//TMED4//AP4S1//NCK2//APPL1//BAIAP2L2//RYR1//STEAP2//KCNQ1//DYSF//MDM2//NOSTRIN//LAMP2//SLC30A3//SYNGR1/…
GO:0017053	transcriptional repressor complex	Cellular component	6	59	503	16875	3.41173	0.00806654	0.280816	2.09331	MTA2//APPL1//GLI3//ARID4A//ZBTB16//RCOR1
GO:0016021	integral to membrane	Cellular component	183	5308	503	16875	1.15663	0.00954679	0.311992	2.02014	AQP1//AQP9//CD2//CEACAM4//ABCC2//CSF3R//MS4A2//FOLR1//GABRB2//GHR//IL2RB//MTNR1B//ROR1//PCDH8//FXYD3//PLXNB1//PTPRK//RHD//ROBO1//RYR1//TSPAN31//SLC10A2//THBD//TM7SF2//TNFRSF4//SLC30A3//OR1E2//NUMB//SLC4A4//SGCE//SYNGR1//SLC28A1//CD83//SLC22A6//NRXN3//GPC6//SLC12A7//NPFFR2//FZD10//PILRB//SLC40A1//PCDHB2//POM121C//IL6R//KCNQ1//KCNRG//GRIK5//B4GALNT1//ENTPD4//STEAP2//MARCH6//DERL3//GRIA1//SCNN1A//AT…
GO:0044459	plasma membrane part	Cellular component	78	2024	503	16875	1.29288	0.0100823	0.311992	1.99644	GNG11//GNG13//HLA-DMA//CD2//GAS1//AQP1//AQP9//CEACAM4//ABCC2//CSF3R//MS4A2//FOLR1//GABRB2//GHR//IL2RB//MTNR1B//ROR1//PCDH8//FXYD3//PLXNB1//PTPRK//RHD//ROBO1//RYR1//TSPAN31//SLC10A2//THBD//TM7SF2//TNFRSF4//SLC30A3//OR1E2//NUMB//SLC4A4//SGCE//SYNGR1//SLC28A1//CD83//SLC22A6//NRXN3//GPC6//SLC12A7//NPFFR2//FZD10//PILRB//SLC40A1//PCDHB2//IL6R//PTGS2//LRP8//EGFR//CTNNA1//CLDN12//CLDN10//EVL//TRPV4//AFAP…
GO:0042383	sarcolemma	Cellular component	7	85	503	16875	2.76283	0.0134128	0.393208	1.87248	RYR1//ALOX5//AQP1//COL6A2//KCNQ1//DYSF//SGCE
GO:0031968	organelle outer membrane	Cellular component	9	130	503	16875	2.3226	0.0158797	0.44225	1.79916	DHCR7//ASL//BNIP3L//CASP8//ACSL1//ACSL3//IFI27//DNM1L//ACSL6
GO:0005741	mitochondrial outer membrane	Cellular component	8	110	503	16875	2.43991	0.0170948	0.453419	1.76714	ASL//BNIP3L//CASP8//ACSL1//ACSL3//IFI27//DNM1L//ACSL6
GO:0043005	neuron projection	Cellular component	25	537	503	16875	1.56186	0.0189719	0.47694	1.72189	NRP1//DLG2//GRIA1//HOMER2//CCK//GRIK5//ROBO1//TAC1//UCHL1//SEMA3A//CNTN4//ALOX5//DCX//PCDH8//TP63//KCNIP1//NDRG2//TRPV4//CDKL5//NMU//ASL//SRD5A1//CASP8//KIF5C//PTGS2
GO:0019867	outer membrane	Cellular component	9	135	503	16875	2.23658	0.0198253	0.47694	1.70278	DHCR7//ASL//BNIP3L//CASP8//ACSL1//ACSL3//IFI27//DNM1L//ACSL6
GO:0005789	endoplasmic reticulum membrane	Cellular component	31	706	503	16875	1.4731	0.0205504	0.47694	1.68718	RYR1//JPH3//MARCH6//DERL3//FMO3//CYP51A1//DHCR7//EGFR//ACSL1//ACSL3//GRIA1//INSIG1//LSS//MEST//FXYD3//PTGS2//RASGRF2//SRD5A1//TM7SF2//UCHL1//ACSL6//SEC61G//NSDHL//HSD17B12//P4HTM//BCAP29//PTDSS2//ELOVL3//LRRC8C//TMED4//POM121C
GO:0019898	extrinsic to membrane	Cellular component	8	116	503	16875	2.3137	0.0227627	0.492848	1.64278	GNG11//GNG13//CTNNA1//SERPINE2//ERRFI1//CNTFR//GHR//UMOD
GO:0044432	endoplasmic reticulum part	Cellular component	34	797	503	16875	1.43119	0.0230055	0.492848	1.63817	NOTCH3//PTGS2//H6PD//OLFM1//CYP51A1//DHCR7//EGFR//ACSL1//ACSL3//FMO3//GRIA1//INSIG1//LSS//MEST//FXYD3//RASGRF2//SRD5A1//TM7SF2//UCHL1//MARCH6//ACSL6//SEC61G//NSDHL//HSD17B12//P4HTM//BCAP29//JPH3//PTDSS2//ELOVL3//LRRC8C//DERL3//TMED4//POM121C//RYR1
GO:0044297	cell body	Cellular component	14	261	503	16875	1.79955	0.0251088	0.517986	1.60017	DLG2//GHR//GRIA1//ROBO1//SRD5A1//TAC1//UCHL1//NRP1//HOMER2//KCNIP1//CCK//ASL//GRIK5//CASP8
GO:0042175	nuclear outer membrane-endoplasmic reticulum membrane network	Cellular component	31	722	503	16875	1.44046	0.026939	0.535893	1.56962	DHCR7//CYP51A1//EGFR//ACSL1//ACSL3//FMO3//GRIA1//INSIG1//LSS//MEST//FXYD3//PTGS2//RASGRF2//SRD5A1//TM7SF2//UCHL1//MARCH6//ACSL6//SEC61G//NSDHL//HSD17B12//P4HTM//BCAP29//JPH3//PTDSS2//ELOVL3//LRRC8C//DERL3//TMED4//POM121C//RYR1
GO:0043025	neuronal cell body	Cellular component	13	246	503	16875	1.7729	0.0334601	0.611879	1.47547	CCK//ASL//GRIK5//DLG2//GHR//GRIA1//ROBO1//SRD5A1//TAC1//UCHL1//NRP1//HOMER2//KCNIP1
GO:0030139	endocytic vesicle	Cellular component	8	125	503	16875	2.14712	0.0335646	0.611879	1.47412	EGFR//GRIA1//MDM2//WASL//NOSTRIN//LAMP2//SEC61G//SFTPD
GO:0043034	costamere	Cellular component	2	10	503	16875	6.70974	0.0340543	0.611879	1.46783	SVIL//FXR1
GO:0005783	endoplasmic reticulum	Cellular component	45	1150	503	16875	1.31278	0.0370322	0.644591	1.43142	NOTCH3//PTGS2//H6PD//OLFM1//CYP51A1//DHCR7//EGFR//ACSL1//ACSL3//FMO3//GRIA1//INSIG1//LSS//MEST//FXYD3//RASGRF2//SRD5A1//TM7SF2//UCHL1//MARCH6//ACSL6//SEC61G//NSDHL//HSD17B12//P4HTM//BCAP29//JPH3//PTDSS2//ELOVL3//LRRC8C//DERL3//TMED4//POM121C//RYR1//ALDH3A1//ASL//BNIP3L//OAS1//PTP4A1//PXDN//NCK2//DSE//NT5C3//INF2//KCNRG
GO:0043240	Fanconi anaemia nuclear complex	Cellular component	2	11	503	16875	6.09977	0.0408146	0.688901	1.38918	FANCE//FANCB
GO:0042995	cell projection	Cellular component	42	1073	503	16875	1.31318	0.0427961	0.701101	1.3686	CDK6//RP1//CNGB3//SPAG6//NRP1//AQP1//SLC9A3//GLI3//BBS5//DLG2//GRIA1//HOMER2//CTNNA1//WASL//DBNL//EVL//TRPV4//CCK//GRIK5//ROBO1//TAC1//UCHL1//SEMA3A//CNTN4//ALOX5//DCX//PCDH8//TP63//KCNIP1//NDRG2//LDB3//DPEP1//CDKL5//KIF5C//CASP8//PTGS2//NMU//UMOD//ASL//SRD5A1//SVIL//FZD10
GO:0005887	integral to plasma membrane	Cellular component	47	1226	503	16875	1.28613	0.0450079	0.716268	1.34671	IL6R//KCNQ1//KCNRG//GRIK5//GRIA1//AQP1//AQP9//CD2//CEACAM4//ABCC2//CSF3R//MS4A2//FOLR1//GABRB2//GHR//IL2RB//MTNR1B//ROR1//PCDH8//FXYD3//PLXNB1//PTPRK//RHD//ROBO1//RYR1//TSPAN31//SLC10A2//THBD//TM7SF2//TNFRSF4//SLC30A3//OR1E2//NUMB//SLC4A4//SGCE//SYNGR1//SLC28A1//CD83//SLC22A6//NRXN3//GPC6//SLC12A7//NPFFR2//FZD10//PILRB//SLC40A1//PCDHB2
GO:0005576	extracellular region	Cellular component	76	2116	503	16875	1.20496	0.0473145	0.73206	1.32501	COL6A2//COL13A1//SFTPD//COL6A6//FGL2//DCN//PXDN//GPC6//LAMA4//ERBB2IP//CRISP1//AMY2A//CCK//DPEP1//EGF//EGFR//GHR//IL6R//SERPINE2//PYY//S100A9//CCL13//STC1//TAC1//THBD//CRISP2//UMOD//LRP8//TNFSF13//BMP15//TNFSF13B//SMR3B//KLK8//KLK14//ENOX1//AQP1//ADAM11//RARRES2//HSD17B12//CD2//CPE//CSF3R//F13B//FOLR1//ITIH4//LCN2//MUC7//NOTCH3//NPPA//PLXNB1//PSG11//RNASE1//SCT//TTN//IL1R2//NRP1//MSLN//SEMA3A//FA…
GO:0044304	main axon	Cellular component	3	28	503	16875	3.5945	0.049692	0.747852	1.30371	ROBO1//CCK//DLG2

## Sheet: down-MF
#Column "GO.ID" stands for the ID of gene ontology term
#Column "Term" stands for the name of gene ontology term
#Column "Ontology" stands for the ontology of GOID belongs to
#Column "Count" stands for the number of DE genes associated with the listed GOID
#Column "Pop.Hits" stands for the number of background population genes associated with the listed GOID
#Column "List.Total" stands for the total number of DE genes
#Column "Pop.Total" stands for the total number of background population genes
#Column "Fold.Enrichment" stands for the Fold Enrichment value of the GOID, it equals (Count/Pop.Hits)/(List.Total/Pop.Total)
#Column "Pvalue" stands for the significance testing value of the GOID
#Column "FDR" stands for the false discovery rate of the GOID, using Benjamini & Hochberg (1995) method
#Column "Enrichment.Score" stands for the Enrichment Score value of the GOID, it equals (-log10(Pvalue))
#Column "GENES" stands for the DE genes associated with the GOID
GO.ID	Term	Ontology	Count	Pop.Hits	List.Total	Pop.Total	Fold.Enrichment	Pvalue	FDR	Enrichment.Score	GENES
GO:0016229	steroid dehydrogenase activity	Molecular function	5	28	470	15325	5.82257	0.00145579	0.58243	2.8369	NSDHL//SRD5A1//HSD17B12//AKR1C1//AKR1C2
GO:0005515	protein binding	Molecular function	238	6731	470	15325	1.15292	0.00173327	0.58243	2.76113	HSP90AA1//PPIC//MTA2//HIPK2//CLEC7A//HSD17B12//TTN//MDM2//TP63//BNIP3L//PLCB1//SCNN1A//WASL//HOMER2//WASF3//FBXO25//DBNL//EVL//TRPV4//AFAP1//INF2//XIRP2//COL6A2//CTNNA1//EGFR//SVIL//MYO16//CNTFR//ENSA//LAMA4//NPPA//SERPINE2//RARRES2//CCL13//TNFSF13//AKAP9//PLXNC1//TNFSF13B//NMU//FGL2//CADM1//CPE//GHR//NRP1//FEM1B//CHN1//GRB10//BMP15//FAM3C//IL6R//PXDN//EGF//DOK3//TYMP//CASP8//SIVA1//ERBB2IP//ADAM…
GO:0042802	identical protein binding	Molecular function	38	768	470	15325	1.61334	0.00253123	0.58243	2.59667	ALDH1A3//BNIP3L//CD2//ENO3//GHR//HMGCS1//HSP90AA1//IL6R//MVD//TPD52L1//TWIST1//ZBTB16//HOMER2//NOD1//PDCD10//IKZF3//PLCB1//CADM1//FBXO4//PRMT8//KIAA1804//ACCS//CASP8//EGFR//GRIK5//ROBO1//TTN//TP63//CLDN12//CLDN10//USP2//TRIP13//DNM1L//CBX3//P2RX2//SCHIP1//CEP72//KCNRG
GO:0008252	nucleotidase activity	Molecular function	3	11	470	15325	8.89265	0.00393527	0.58243	2.40503	NT5E//NT5C3//NT5M
GO:0016628	oxidoreductase activity, acting on the CH-CH group of donors, NAD or NADP as acceptor	Molecular function	4	23	470	15325	5.67068	0.00486642	0.58243	2.31279	AKR1C1//AKR1C2//DHCR7//TM7SF2
GO:0004467	long-chain fatty acid-CoA ligase activity	Molecular function	3	12	470	15325	8.1516	0.00512856	0.58243	2.29	ACSL1//ACSL3//ACSL6
GO:0008106	alcohol dehydrogenase (NADP+) activity	Molecular function	3	12	470	15325	8.1516	0.00512856	0.58243	2.29	AKR1C1//AKR1C2//ALDH3A1
GO:0032813	tumor necrosis factor receptor superfamily binding	Molecular function	5	37	470	15325	4.40627	0.00515122	0.58243	2.28809	FEM1B//CASP8//TNFSF13//TNFSF13B//SIVA1
GO:0033764	steroid dehydrogenase activity, acting on the CH-OH group of donors, NAD or NADP as acceptor	Molecular function	4	24	470	15325	5.4344	0.00570041	0.58243	2.24409	NSDHL//HSD17B12//AKR1C1//AKR1C2
GO:0015645	fatty acid ligase activity	Molecular function	3	14	470	15325	6.98708	0.00810749	0.58243	2.09111	ACSL1//ACSL3//ACSL6
GO:0004871	signal transducer activity	Molecular function	66	1626	470	15325	1.32351	0.0106634	0.58243	1.97211	PDK3//IL21R//P2RX2//PTGDR//RORC//MAPK10//KIAA1804//MAP3K15//EGFR//ROR1//PLXNB1//THBD//LRP8//GABRB2//CSF3R//CNTFR//IL6R//GHR//IL1R2//IL2RB//FZD10//CELSR2//GPR18//MTNR1B//OR1F1//OR1E2//LANCL1//NPFFR2//OR8B8//OR8G1//OR4K5//OR52N1//MCHR2//GPR128//MRGPRE//OR2T11//OPN5//TAS2R41//OR5B12//OR11G2//OR4M2//OR4F6//OR6K3//OR5K4//AKR1C2//GRIA1//PTPRK//NRP1//TNFRSF4//TNFRSF10A//ROBO1//SEMA5A//MAP4K1//TAS2R8//GR…
GO:0060089	molecular transducer activity	Molecular function	66	1626	470	15325	1.32351	0.0106634	0.58243	1.97211	PDK3//IL21R//P2RX2//PTGDR//RORC//MAPK10//KIAA1804//MAP3K15//EGFR//ROR1//CELSR2//GNG11//GPR18//MTNR1B//OR1F1//PER1//S100A9//OR1E2//FST//NPFFR2//FZD10//PLCB1//OR8B8//OR8G1//TAS2R8//GNG13//VN1R1//AHRR//HIF3A//OR4K5//OR52N1//MCHR2//TRIM55//GPR128//MRGPRE//OR2T11//OPN5//TMED4//TAS2R41//OR5B12//OR11G2//OR4M2//OR4F6//OR6K3//OR5K4//PLXNB1//THBD//LRP8//GABRB2//CSF3R//CNTFR//IL6R//GHR//IL1R2//IL2RB//LANCL1…
GO:0050661	NADP binding	Molecular function	5	44	470	15325	3.70527	0.0107787	0.58243	1.96743	GMDS//SRD5A1//FMO3//H6PD//NNT
GO:0016877	ligase activity, forming carbon-sulfur bonds	Molecular function	4	29	470	15325	4.49743	0.0112973	0.58243	1.94702	ACSS2//ACSL1//ACSL3//ACSL6
GO:0004896	cytokine receptor activity	Molecular function	7	80	470	15325	2.85306	0.0113102	0.58243	1.94653	IL21R//CNTFR//IL6R//GHR//IL1R2//IL2RB//CSF3R
GO:0016702	oxidoreductase activity, acting on single donors with incorporation of molecular oxygen, incorporation of two atoms of oxygen	Molecular function	7	82	470	15325	2.78347	0.0128527	0.58243	1.89101	ALOX5//ETHE1//PTGS2//P4HTM//TET2//TMLHE//BCO2
GO:0016701	oxidoreductase activity, acting on single donors with incorporation of molecular oxygen	Molecular function	7	83	470	15325	2.74994	0.0136782	0.58243	1.86397	ALOX5//PTGS2//P4HTM//TET2//TMLHE//BCO2//ETHE1
GO:0042169	SH2 domain binding	Molecular function	4	31	470	15325	4.20728	0.0142662	0.58243	1.84569	MS4A2//GHR//TRPV4//AFAP1L2
GO:0051213	dioxygenase activity	Molecular function	7	84	470	15325	2.7172	0.0145409	0.58243	1.83741	ALOX5//PTGS2//P4HTM//TET2//TMLHE//BCO2//ETHE1
GO:0051015	actin filament binding	Molecular function	6	66	470	15325	2.96422	0.0155256	0.58243	1.80895	CTNNA1//EGFR//SVIL//TTN//MYO16//TRPV4
GO:0016504	peptidase activator activity	Molecular function	4	32	470	15325	4.0758	0.0159189	0.58243	1.79809	TPD52L1//NOD1//SIVA1//PCOLCE2
GO:0004033	aldo-keto reductase (NADP) activity	Molecular function	3	18	470	15325	5.4344	0.0165995	0.58243	1.77991	AKR1C1//AKR1C2//ALDH3A1
GO:0008656	cysteine-type endopeptidase activator activity involved in apoptotic process	Molecular function	3	18	470	15325	5.4344	0.0165995	0.58243	1.77991	TPD52L1//NOD1//SIVA1
GO:0016491	oxidoreductase activity	Molecular function	32	705	470	15325	1.48001	0.017523	0.58243	1.75639	NSDHL//SRD5A1//GMPR//NDUFB1//NNT//ADH6//ALDH3A1//ALDH1A3//AKR1C1//AKR1C2//ALOX5//HSD17B12//H6PD//CYP51A1//FMO3//PTGS2//PXDN//RRM1//GSTK1//ALDH1L1//P4HTM//TET2//TMLHE//BCO2//DHCR7//ETHE1//TM7SF2//ENOX1//STEAP4//RTN4IP1//STEAP2//HSD17B13
GO:0004674	protein serine/threonine kinase activity	Molecular function	22	441	470	15325	1.62662	0.0176229	0.58243	1.75392	PRKAA1//PRKAG2//CDK6//CDKL5//CDKL2//ICK//MAPK10//KIAA1804//MAP3K15//EGFR//MAP4K1//GTF2H1//HSP90AA1//SRPK2//TESK1//TTN//KALRN//PLK4//TLK2//HIPK2//STK32B//YSK4
GO:0019904	protein domain specific binding	Molecular function	25	519	470	15325	1.57064	0.0176811	0.58243	1.75249	GRIK5//INPP5D//LANCL1//EVL//BAIAP2L2//AFAP1L2//DLG2//GRIA1//FZD10//CADM1//ROBO1//HSP90AA1//MS4A2//GHR//TRPV4//SCNN1A//PMEPA1//NOD1//ATRX//ETV6//SKIL//TGM2//TWIST1//HOMER2//CBX3
GO:0004693	cyclin-dependent protein kinase activity	Molecular function	4	33	470	15325	3.95229	0.017687	0.58243	1.75235	CDK6//CDKL5//CDKL2//ICK
GO:0016709	oxidoreductase activity, acting on paired donors, with incorporation or reduction of molecular oxygen, NADH or NADPH as one donor, and incorporation of one atom of oxygen	Molecular function	4	33	470	15325	3.95229	0.017687	0.58243	1.75235	FMO3//CYP51A1//AKR1C1//AKR1C2
GO:0004702	receptor signaling protein serine/threonine kinase activity	Molecular function	5	50	470	15325	3.26064	0.0181228	0.58243	1.74177	MAPK10//KIAA1804//MAP3K15//EGFR//MAP4K1
GO:0008146	sulfotransferase activity	Molecular function	5	51	470	15325	3.1967	0.0196023	0.608978	1.70769	GAL3ST2//SULT1E1//UST//HS6ST2//SULT6B1
GO:0004709	MAP kinase kinase kinase activity	Molecular function	3	20	470	15325	4.89096	0.0221675	0.654645	1.65428	EGFR//KIAA1804//MAP3K15
GO:0015276	ligand-gated ion channel activity	Molecular function	9	136	470	15325	2.15778	0.0242717	0.654645	1.6149	P2RX2//GRIA1//RYR1//AQP1//CNGB3//GRIK5//GABRB2//JPH3//SCNN1A
GO:0022834	ligand-gated channel activity	Molecular function	9	136	470	15325	2.15778	0.0242717	0.654645	1.6149	P2RX2//GRIA1//RYR1//AQP1//CNGB3//GRIK5//GABRB2//JPH3//SCNN1A
GO:0016627	oxidoreductase activity, acting on the CH-CH group of donors	Molecular function	5	54	470	15325	3.01911	0.0245083	0.654645	1.61069	SRD5A1//AKR1C1//AKR1C2//DHCR7//TM7SF2
GO:0004888	transmembrane signaling receptor activity	Molecular function	50	1231	470	15325	1.32439	0.0247632	0.654645	1.60619	IL21R//P2RX2//PTGDR//EGFR//ROR1//GABRB2//CSF3R//CNTFR//IL6R//GHR//IL1R2//IL2RB//FZD10//CELSR2//GPR18//MTNR1B//OR1F1//OR1E2//LANCL1//NPFFR2//OR8B8//OR8G1//OR4K5//OR52N1//MCHR2//GPR128//MRGPRE//OR2T11//OPN5//TAS2R41//OR5B12//OR11G2//OR4M2//OR4F6//OR6K3//OR5K4//AKR1C2//GRIA1//PTPRK//NRP1//TNFRSF4//TNFRSF10A//ROBO1//SEMA5A//TAS2R8//GRIK5//VN1R1//PLXNB1//THBD//LRP8
GO:0016505	apoptotic protease activator activity	Molecular function	3	21	470	15325	4.65805	0.0252867	0.654645	1.59711	TPD52L1//NOD1//SIVA1
GO:0005217	intracellular ligand-gated ion channel activity	Molecular function	3	22	470	15325	4.44632	0.0286291	0.705531	1.54319	RYR1//AQP1//CNGB3
GO:0005488	binding	Molecular function	380	11840	470	15325	1.04649	0.0317597	0.705531	1.49812	HSP90AA1//PPIC//ADH6//ATRX//CDK6//ABCC2//EGFR//ERCC6//ACSL1//ACSL3//GMDS//HNRNPA2B1//KIF2A//KIF5C//MVD//NAIP//CNOT4//NT5E//ROR1//OAS1//PC//PDK3//PRKAA1//MAPK10//RIT2//SKIL//SRPK2//CDKL5//TESK1//TTN//UBE2D2//KALRN//CDKL2//TRIP13//DNM1L//G3BP1//NOD1//PLK4//TLK2//MAP4K1//ICK//MYO16//ACSL6//DICER1//RAB38//ARL5A//HIPK2//NSDHL//HSD17B12//NT5C3//PRKAG2//PANK1//CNGB3//ESRP1//ENOX1//STK32B//ACSS2//NT5M//R…
GO:0016836	hydro-lyase activity	Molecular function	4	40	470	15325	3.26064	0.0334459	0.705531	1.47566	CA7//CA8//ENO3//GMDS
GO:0004029	aldehyde dehydrogenase (NAD) activity	Molecular function	2	10	470	15325	6.52128	0.0358829	0.705531	1.44511	ALDH3A1//ALDH1A3
GO:0005451	monovalent cation:hydrogen antiporter activity	Molecular function	2	10	470	15325	6.52128	0.0358829	0.705531	1.44511	SLC9A3//SLC47A1
GO:0017110	nucleoside-diphosphatase activity	Molecular function	2	10	470	15325	6.52128	0.0358829	0.705531	1.44511	NUDT9//ENTPD4
GO:0043395	heparan sulfate proteoglycan binding	Molecular function	2	10	470	15325	6.52128	0.0358829	0.705531	1.44511	GPC6//FST
GO:0003730	mRNA 3'-UTR binding	Molecular function	3	24	470	15325	4.0758	0.0359782	0.705531	1.44396	FXR1//SERBP1//TUT1
GO:0005164	tumor necrosis factor receptor binding	Molecular function	3	24	470	15325	4.0758	0.0359782	0.705531	1.44396	CASP8//TNFSF13//TNFSF13B
GO:0008093	cytoskeletal adaptor activity	Molecular function	3	24	470	15325	4.0758	0.0359782	0.705531	1.44396	NCK2//SORBS2//BAIAP2L2
GO:0043028	cysteine-type endopeptidase regulator activity involved in apoptotic process	Molecular function	4	41	470	15325	3.18111	0.0361953	0.705531	1.44135	TPD52L1//NOD1//SIVA1//DPEP1
GO:0016782	transferase activity, transferring sulfur-containing groups	Molecular function	5	60	470	15325	2.7172	0.0365261	0.705531	1.4374	GAL3ST2//SULT1E1//UST//HS6ST2//SULT6B1
GO:0015291	secondary active transmembrane transporter activity	Molecular function	11	194	470	15325	1.84882	0.0370933	0.705531	1.4307	SLC2A10//SLC47A1//SLC4A4//SLC22A6//SLC26A1//SLC10A2//SLC12A7//SLC38A4//SLC9A3//SLC26A10//SLC28A1
GO:0015297	antiporter activity	Molecular function	5	61	470	15325	2.67265	0.0388255	0.723707	1.41088	SLC47A1//SLC4A4//SLC22A6//SLC9A3//SLC26A10
GO:0004955	prostaglandin receptor activity	Molecular function	2	11	470	15325	5.92843	0.0429823	0.741843	1.36671	PTGDR//AKR1C2
GO:0015250	water channel activity	Molecular function	2	11	470	15325	5.92843	0.0429823	0.741843	1.36671	AQP1//AQP9
GO:0015665	alcohol transmembrane transporter activity	Molecular function	2	11	470	15325	5.92843	0.0429823	0.741843	1.36671	AQP9//AQP1
GO:0030296	protein tyrosine kinase activator activity	Molecular function	2	11	470	15325	5.92843	0.0429823	0.741843	1.36671	EGF//AFAP1L2
GO:0031406	carboxylic acid binding	Molecular function	10	176	470	15325	1.85264	0.0449593	0.754434	1.34718	FABP5//FOLR1//PC//FMO3//P4HTM//TMLHE//AKR1C1//AKR1C2//LANCL1//DPEP1
GO:0038023	signaling receptor activity	Molecular function	51	1310	470	15325	1.26941	0.0453308	0.754434	1.34361	IL21R//P2RX2//PTGDR//RORC//EGFR//ROR1//PLXNB1//THBD//LRP8//GABRB2//CSF3R//CNTFR//IL6R//GHR//IL1R2//IL2RB//FZD10//CELSR2//GPR18//MTNR1B//OR1F1//OR1E2//LANCL1//NPFFR2//OR8B8//OR8G1//OR4K5//OR52N1//MCHR2//GPR128//MRGPRE//OR2T11//OPN5//TAS2R41//OR5B12//OR11G2//OR4M2//OR4F6//OR6K3//OR5K4//AKR1C2//GRIA1//PTPRK//NRP1//TNFRSF4//TNFRSF10A//ROBO1//SEMA5A//TAS2R8//GRIK5//VN1R1

## Sheet: up-BP
#Column "GO.ID" stands for the ID of gene ontology term
#Column "Term" stands for the name of gene ontology term
#Column "Ontology" stands for the ontology of GOID belongs to
#Column "Count" stands for the number of DE genes associated with the listed GOID
#Column "Pop.Hits" stands for the number of background population genes associated with the listed GOID
#Column "List.Total" stands for the total number of DE genes
#Column "Pop.Total" stands for the total number of background population genes
#Column "Fold.Enrichment" stands for the Fold Enrichment value of the GOID, it equals (Count/Pop.Hits)/(List.Total/Pop.Total)
#Column "Pvalue" stands for the significance testing value of the GOID
#Column "FDR" stands for the false discovery rate of the GOID, using Benjamini & Hochberg (1995) method
#Column "Enrichment.Score" stands for the Enrichment Score value of the GOID, it equals (-log10(Pvalue))
#Column "GENES" stands for the DE genes associated with the GOID
GO.ID	Term	Ontology	Count	Pop.Hits	List.Total	Pop.Total	Fold.Enrichment	Pvalue	FDR	Enrichment.Score	GENES
GO:0048731	system development	Biological process	153	3095	493	14742	1.47822	6.84425e-08	0.000291702	7.16467	ANXA2//COL9A2//COL12A1//DLX6//EN1//INHA//ACD//UNCX//EREG//FN1//SERPINE1//PLAU//TGFB2//ADM2//WNT5B//VGF//LAMA4//FZD4//STK4//RBP4//GATA2//AXL//SPOCK1//MDGA1//TCF3//BMP4//MME//TSC1//WFS1//HMGCL//RXRA//ETNK2//ARNT//CCBE1//CASP6//FOXL1//LY6H//TLE2//LHX4//ACHE//ADORA1//CHRM1//DYRK1A//FGF13//NRG1//PSPN//PRPS1//PTPRF//SIM2//DPF1//SEMA6B//KIAA1279//RAPGEFL1//AMIGO1//SEMA6D//BRSK1//APBB1//DST//CLTA//FYN//G…
GO:0048856	anatomical structure development	Biological process	167	3510	493	14742	1.42272	1.7921e-07	0.000381896	6.74664	IL7R//STK4//TGFB2//DAB2//ANXA2//COL9A2//COL12A1//DLX6//EN1//INHA//ACD//UNCX//EREG//FN1//SERPINE1//PLAU//ADM2//WNT5B//VGF//LAMA4//FZD4//RBP4//GATA2//BMP4//PSPN//TLX2//TCAP//AXL//SPOCK1//MDGA1//TCF3//MME//TSC1//WFS1//HMGCL//RXRA//ETNK2//ARNT//CCBE1//ACHE//CASP6//HNF4A//H1FNT//EYA4//FBN2//MCAM//SOX13//IGF2BP2//FOXL1//LY6H//TLE2//LHX4//MBD3//EDA//ADORA1//CHRM1//DYRK1A//FGF13//NRG1//PRPS1//PTPRF//SIM2…
GO:0007275	multicellular organismal development	Biological process	172	3675	493	14742	1.39952	3.29024e-07	0.000467433	6.48277	ANXA2//COL9A2//COL12A1//DLX6//EN1//INHA//ACD//UNCX//EREG//FN1//SERPINE1//PLAU//TGFB2//ADM2//WNT5B//VGF//LAMA4//FZD4//STK4//RBP4//GATA2//BMP4//PSPN//DAB2//KEAP1//MBD3//ETNK2//TLX2//TCAP//AXL//SPOCK1//MDGA1//TCF3//MME//TSC1//WFS1//HMGCL//RXRA//ARNT//CCBE1//CASP6//FOXL1//NRG1//NPM2//SIM2//MID1//LY6H//TLE2//LHX4//ACHE//ADORA1//CHRM1//DYRK1A//FGF13//PRPS1//PTPRF//DPF1//SEMA6B//KIAA1279//RAPGEFL1//AMIG…
GO:0032502	developmental process	Biological process	187	4104	493	14742	1.36252	4.96359e-07	0.000528871	6.3042	IL7R//STK4//TGFB2//DAB2//SERPINE1//ANXA2//COL9A2//COL12A1//DLX6//EN1//INHA//ACD//UNCX//EREG//FN1//PLAU//ADM2//WNT5B//VGF//LAMA4//FZD4//BMP4//RBP4//GATA2//PSPN//KEAP1//MBD3//ETNK2//TLX2//CYP26B1//TCAP//AXL//SPOCK1//MDGA1//TCF3//MME//TSC1//WFS1//HMGCL//RXRA//ARNT//CCBE1//ACHE//CASP6//HNF4A//EDA//EYA4//FOXL1//FYN//HOXC4//HOXC6//ITGB2//MITF//PLXNB1//SIM2//TNP2//CD164//GALR2//SEMA6B//KIAA1279//IFT81//…
GO:0032501	multicellular organismal process	Biological process	225	5201	493	14742	1.29362	9.22163e-07	0.000786052	6.03519	ANXA2//COL9A2//COL12A1//DLX6//EN1//INHA//ACD//UNCX//ECM1//MAPK8//C1ORF9//SLC1A3//ACHE//EREG//FN1//SERPINE1//PLAU//TGFB2//ADM2//WNT5B//VGF//LAMA4//FZD4//STK4//BMP4//RBP4//GATA2//PSPN//ADORA1//DAB2//KEAP1//MBD3//ETNK2//TLX2//TCAP//AXL//SPOCK1//MDGA1//CCR7//CCL19//TCF3//MME//TSC1//WFS1//HMGCL//RXRA//ARNT//CCBE1//RASD2//F2RL1//CASP6//TPM1//MCAM//CHRNB1//MYLK//TPM4//UTRN//SSPN//GALR2//MYL9//CALU//FYN/…
GO:0042060	wound healing	Biological process	44	615	493	14742	2.13938	1.65489e-06	0.00117553	5.78123	CALU//FN1//FYN//GATA2//GP1BA//GRB2//H3F3B//HNF4A//ITGB2//ITPR1//KLKB1//OLR1//SERPINE1//PDPK1//PLAU//PLCG1//PRKCB//PROS1//RAC2//RAP1B//TGFB2//WAS//HIST1H3F//SH2B3//RASGRP2//PROCR//PPIL2//SH2B1//KLC2//DOCK8//HIST2H3D//TEC//CAPN3//AXL//IL11//F2RL1//VTN//GSN//ANXA2//MCAM//MYLK//EREG//NRG1//TPM1
GO:0007596	blood coagulation	Biological process	37	500	493	14742	2.2128	5.34453e-06	0.00303449	5.27209	GP1BA//KLKB1//TEC//AXL//CALU//FN1//FYN//GRB2//IL11//ITPR1//SERPINE1//PDPK1//PRKCB//PROS1//RAC2//RAP1B//TGFB2//RASGRP2//F2RL1//VTN//ANXA2//PLAU//GATA2//H3F3B//HNF4A//ITGB2//OLR1//PLCG1//WAS//HIST1H3F//SH2B3//PROCR//PPIL2//SH2B1//KLC2//DOCK8//HIST2H3D
GO:0007599	hemostasis	Biological process	37	504	493	14742	2.19523	6.40788e-06	0.00303449	5.19329	CALU//FN1//FYN//GATA2//GP1BA//GRB2//H3F3B//HNF4A//ITGB2//ITPR1//KLKB1//OLR1//SERPINE1//PDPK1//PLAU//PLCG1//PRKCB//PROS1//RAC2//RAP1B//TGFB2//WAS//HIST1H3F//SH2B3//RASGRP2//PROCR//PPIL2//SH2B1//KLC2//DOCK8//HIST2H3D//TEC//AXL//IL11//F2RL1//VTN//ANXA2
GO:0050817	coagulation	Biological process	37	504	493	14742	2.19523	6.40788e-06	0.00303449	5.19329	CALU//FN1//FYN//GATA2//GP1BA//GRB2//H3F3B//HNF4A//ITGB2//ITPR1//KLKB1//OLR1//SERPINE1//PDPK1//PLAU//PLCG1//PRKCB//PROS1//RAC2//RAP1B//TGFB2//WAS//HIST1H3F//SH2B3//RASGRP2//PROCR//PPIL2//SH2B1//KLC2//DOCK8//HIST2H3D//TEC//AXL//IL11//F2RL1//VTN//ANXA2
GO:0050878	regulation of body fluid levels	Biological process	40	588	493	14742	2.03419	1.6444e-05	0.00643065	4.78399	WFS1//ADORA1//F2RL1//CALU//FN1//FYN//GATA2//GP1BA//GRB2//H3F3B//HNF4A//ITGB2//ITPR1//KLKB1//OLR1//SERPINE1//PDPK1//PLAU//PLCG1//PRKCB//PROS1//RAC2//RAP1B//TGFB2//WAS//HIST1H3F//SH2B3//RASGRP2//PROCR//PPIL2//SH2B1//KLC2//DOCK8//HIST2H3D//ANXA2//TAC4//TEC//AXL//IL11//VTN
GO:0009653	anatomical structure morphogenesis	Biological process	94	1847	493	14742	1.52185	1.65972e-05	0.00643065	4.77997	IL7R//STK4//TGFB2//DAB2//UNCX//ANXA2//EREG//FN1//SERPINE1//PLAU//ADM2//WNT5B//FZD4//BMP4//PSPN//TLX2//TCAP//TSC1//CCBE1//HNF4A//FOXL1//LY6H//TLE2//LHX4//APBB1//DST//BRSK1//CLTA//COL9A2//FYN//GRB2//PLCG1//PLXNB1//RAC2//SDCBP//KLF7//FARP2//MYL9//MYH14//SEMA6D//AMIGO1//ITGB2//PALM//FERMT2//FGD3//DLX6//CAPN3//FBN2//PBX2//CYP26B1//ACD//CEP290//ANXA3//RXRA//RTN4RL2//AXL//CRABP2//EN1//GSN//CBY1//STK36//…
GO:0009987	cellular process	Biological process	451	12597	493	14742	1.07058	2.69503e-05	0.00942987	4.56944	GTPBP5//IL7R//ACOX1//RAB6A//BECN1//ATG16L1//ACHE//CDC25C//DBF4//GINS3//ING5//RAD21//NEK6//DSN1//DCLRE1C//CRYAA//RPA4//BCCIP//TCF3//CAMK2D//LSM10//ABCB1//CEP290//TUBGCP5//CLIP1//BMP4//RUNX3//GATA2//RXRA//SIM2//ZMYND8//EID1//LMCD1//MBD3//HIST2H3D//FGF13//RAPGEF2//UBTF//RNPS1//PAN3//ADORA1//ADORA2B//BTRC//HUWE1//PPIL2//UBE2L6//TRIP12//HERC4//SMURF2//DST//MAPT//MID1//DYRK1A//MPHOSPH10//SMNDC1//GEMIN4…
GO:0016043	cellular component organization	Biological process	166	3772	493	14742	1.31597	2.87631e-05	0.00942987	4.54116	BECN1//ATG16L1//DCLRE1C//DST//MAPT//MID1//RAD21//CLIP1//DSN1//GEMIN4//PSIP1//ACD//IL7R//STK4//TGFB2//DAB2//CAMK2D//SPOCK1//RASGRP2//FAM107A//TLK2//BAX//IFI6//GPX1//BBC3//CHRNB1//BMP4//HIST1H2BD//HIST1H2BB//H3F3B//HIST1H2BL//HIST1H2BC//HIST1H2BO//HIST2H2BE//HIST1H3F//HIST1H2AG//HIST2H3D//HIST2H2AA4//GSN//ABR//PDPK1//RAC2//SDCBP//FERMT2//NUAK2//FGD3//PALM//TPM1//AGXT//RNASEH1//BIRC7//NPM2//MBD3//CA…
GO:0009611	response to wounding	Biological process	60	1056	493	14742	1.69901	3.52185e-05	0.0107215	4.45323	CASP6//KLKB1//ADORA1//ADORA2B//CCR7//FN1//CALU//FYN//GATA2//GP1BA//GRB2//H3F3B//HNF4A//ITGB2//ITPR1//OLR1//SERPINE1//PDPK1//PLAU//PLCG1//PRKCB//PROS1//RAC2//RAP1B//TGFB2//WAS//HIST1H3F//SH2B3//RASGRP2//PROCR//PPIL2//SH2B1//KLC2//DOCK8//HIST2H3D//AXL//F2RL1//RXRA//CCL19//CCRL2//TEC//CAPN3//IL11//VTN//RTN4RL2//EREG//NRG1//TPM1//GSN//ANXA2//GIPR//MAX//NLRP1//ABR//GHSR//MCAM//MYLK//ACHE//DST//SLC1A3
GO:0030154	cell differentiation	Biological process	114	2408	493	14742	1.41566	4.52991e-05	0.012871	4.34391	DAB2//EREG//FZD4//BMP4//GATA2//CYP26B1//AXL//SPOCK1//MDGA1//TCF3//TGFB2//WNT5B//ACHE//H1FNT//POU6F2//APBB1//DST//BRSK1//CLTA//COL9A2//FYN//GRB2//PLCG1//PLXNB1//PSPN//RAC2//SDCBP//KLF7//FARP2//MYL9//MYH14//SEMA6D//AMIGO1//CACNG2//LHX4//NPM2//PLP1//RBM24//GSN//NRG1//CYP26C1//SS18L1//SHANK3//FLT3LG//RUNX1//TUBB2A//IL11//DCLRE1C//SPRR2F//STK4//IL7R//PPP3CB//ZAP70//PATZ1//ALAS2//INHA//TRIM10//CAPN3//T…
GO:0048869	cellular developmental process	Biological process	119	2554	493	14742	1.39327	5.94032e-05	0.0158235	4.22619	IL7R//STK4//TGFB2//DAB2//EREG//FZD4//BMP4//GATA2//CYP26B1//AXL//SPOCK1//MDGA1//TCF3//WNT5B//ACHE//H1FNT//POU6F2//APBB1//DST//BRSK1//CLTA//COL9A2//FYN//GRB2//PLCG1//PLXNB1//PSPN//RAC2//SDCBP//KLF7//FARP2//MYL9//MYH14//SEMA6D//AMIGO1//CACNG2//LHX4//FN1//ITGB2//PALM//FERMT2//FGD3//NPM2//PLP1//RBM24//GSN//NRG1//CYP26C1//SS18L1//SHANK3//FLT3LG//RUNX1//ARNT//EDA//HNF4A//INHA//SIM2//TNP2//ZFP37//SH2B3//…
GO:0071840	cellular component organization or biogenesis	Biological process	168	3883	493	14742	1.29375	6.64489e-05	0.0166591	4.17751	GTPBP5//BECN1//ATG16L1//DCLRE1C//DST//MAPT//MID1//RAD21//CLIP1//DSN1//GEMIN4//PSIP1//ACD//IL7R//STK4//TGFB2//DAB2//CAMK2D//SPOCK1//RASGRP2//FAM107A//TLK2//BAX//IFI6//GPX1//BBC3//CHRNB1//BMP4//HIST1H2BD//HIST1H2BB//H3F3B//HIST1H2BL//HIST1H2BC//HIST1H2BO//HIST2H2BE//HIST1H3F//HIST1H2AG//HIST2H3D//HIST2H2AA4//GSN//ABR//PDPK1//RAC2//SDCBP//FERMT2//NUAK2//FGD3//PALM//TPM1//AGXT//RNASEH1//BIRC7//NPM2//…
GO:0051239	regulation of multicellular organismal process	Biological process	79	1550	493	14742	1.52407	8.51555e-05	0.0201629	4.06979	EREG//VGF//ADORA1//F2RL1//TPM1//BMP4//ANXA6//MYL9//MYL2//SRI//CAMK2D//PROCR//ADORA2B//PTGS1//SPHK1//TAC4//HNF4A//TEC//ARNT//LMCD1//PLCG1//TGFB2//RBM24//SPOCK1//CAPN3//INHA//GP1BA//SERPINE1//VTN//PHOSPHO1//FBN2//ECM1//RUNX1//ACHE//EFEMP1//UBE2L6//CCR7//GHSR//AXL//CCL19//PRKD2//FLT3LG//IL7R//GPX1//IGF2BP2//RNF128//ANXA2//PLAU//ZAP70//KEAP1//GATA2//ETV5//TCF3//ANXA3//PRKCB//ADM2//MAPT//LAMA4//CASP6/…
GO:0006937	regulation of muscle contraction	Biological process	11	83	493	14742	3.963	9.59056e-05	0.0215131	4.01816	MYL2//SRI//PTGS1//SPHK1//CAMK2D//GHSR//ADORA1//ADORA2B//ANXA6//TPM1//MYL9
GO:0032989	cellular component morphogenesis	Biological process	51	888	493	14742	1.71738	0.000108335	0.0228414	3.96523	IL7R//STK4//TGFB2//DAB2//BMP4//APBB1//DST//BRSK1//CLTA//COL9A2//FYN//GRB2//PLCG1//PLXNB1//PSPN//RAC2//SDCBP//KLF7//FARP2//MYL9//MYH14//SEMA6D//AMIGO1//LHX4//FN1//ITGB2//PALM//FERMT2//FGD3//CAPN3//TCAP//RXRA//RTN4RL2//AXL//FZD4//CBY1//STK36//CEP290//TTC8//TPM1//MAPT//SLC1A3//PPP3CB//ACHE//TLX2//PTPRF//CAPRIN2//MYL2//GSN//SHANK3//CRYAA
GO:0006936	muscle contraction	Biological process	20	233	493	14742	2.56675	0.000112546	0.0228414	3.94867	TCAP//ANXA6//TPM1//MYL9//MYLK//MYL2//SRI//PTGS1//SPHK1//CAMK2D//HTR1D//TPM4//MB//GHSR//ADORA1//ADORA2B//CHRNB1//UTRN//SSPN//GALR2
GO:0090257	regulation of muscle system process	Biological process	12	101	493	14742	3.55279	0.000136737	0.0262228	3.86411	ANXA6//TPM1//MYL9//MYL2//SRI//PTGS1//SPHK1//LMCD1//CAMK2D//GHSR//ADORA1//ADORA2B
GO:0046903	secretion	Biological process	43	715	493	14742	1.79834	0.000141512	0.0262228	3.84921	F2RL1//CALU//FN1//SERPINE1//PROS1//TGFB2//ADORA1//STX3//EXOC8//SYT1//ALDH5A1//BRSK1//TNP2//ANXA2//HNF4A//ITPR1//PPP3CB//RAP1B//TAC4//GNPTAB//PTGS1//ADORA2B//INHA//LGI3//VGF//GHSR//GIPR//RBP4//CGA//AXL//FZD4//ANXA3//ABR//SYTL4//AGXT//IL11//PLA2G4F//CCR7//ACHE//PANX1//CCL19//NLRP1//NRG1
GO:0006950	response to stress	Biological process	125	2773	493	14742	1.34794	0.0001603	0.0284667	3.79507	BECN1//ATG16L1//RPA4//SERPINE1//ZFYVE26//ADORA1//ALAS2//ARNT//CRYAA//ITPR1//MB//PLAU//TGFB2//MAPK8//CASP6//KLKB1//ADORA2B//CCR7//CREB3L1//MX2//P2RY11//TAP1//WAS//HCP5//FN1//ANXA3//PRG2//HIST1H2BC//HIST2H2BE//NLRP1//CALU//FYN//GATA2//GP1BA//GRB2//H3F3B//HNF4A//ITGB2//OLR1//PDPK1//PLCG1//PRKCB//PROS1//RAC2//RAP1B//HIST1H3F//SH2B3//RASGRP2//PROCR//PPIL2//SH2B1//KLC2//DOCK8//HIST2H3D//EYA4//NUDT1//MU…
GO:0045766	positive regulation of angiogenesis	Biological process	10	74	493	14742	4.0409	0.000168111	0.0286595	3.7744	ANXA3//RUNX1//ECM1//GATA2//SERPINE1//PLCG1//PRKCB//SPHK1//PRKD2//ADM2
GO:0061041	regulation of wound healing	Biological process	10	75	493	14742	3.98702	0.000188279	0.0303004	3.7252	TEC//CAPN3//F2RL1//GP1BA//SERPINE1//VTN//ANXA2//PLAU//KLKB1//MYLK
GO:0048468	cell development	Biological process	67	1292	493	14742	1.55068	0.000192512	0.0303004	3.71554	DAB2//EREG//TGFB2//ACHE//BMP4//H1FNT//APBB1//DST//BRSK1//CLTA//COL9A2//FYN//GRB2//PLCG1//PLXNB1//PSPN//RAC2//SDCBP//KLF7//FARP2//MYL9//MYH14//SEMA6D//AMIGO1//CACNG2//LHX4//RBM24//SPOCK1//GSN//NRG1//CYP26C1//SS18L1//GATA2//PLP1//CAPN3//TCAP//RXRA//RTN4RL2//STX3//GALR2//AXL//FN1//FZD4//CEP290//TPM1//ETV5//TCF3//MAPT//CASP6//BAX//SHANK3//CCR7//CCL19//EN1//SLC1A3//PPP3CB//CHRNB1//RUNX1//RUNX3//TLX2//…
GO:0003012	muscle system process	Biological process	21	262	493	14742	2.39678	0.000200085	0.0303004	3.69879	TCAP//CHRNB1//MYLK//TPM1//TPM4//UTRN//SSPN//GALR2//MYL9//ANXA6//MYL2//SRI//PTGS1//SPHK1//LMCD1//CAMK2D//HTR1D//MB//GHSR//ADORA1//ADORA2B
GO:0065008	regulation of biological quality	Biological process	106	2286	493	14742	1.38656	0.000206173	0.0303004	3.68577	DCLRE1C//ACD//SLC1A3//ACHE//SRI//ADORA1//F2RL1//TPM1//WFS1//KEAP1//GSN//CALU//FN1//FYN//GATA2//GP1BA//GRB2//H3F3B//HNF4A//ITGB2//ITPR1//KLKB1//OLR1//SERPINE1//PDPK1//PLAU//PLCG1//PRKCB//PROS1//RAC2//RAP1B//TGFB2//WAS//HIST1H3F//SH2B3//RASGRP2//PROCR//PPIL2//SH2B1//KLC2//DOCK8//HIST2H3D//GPX1//CGA//SLC5A5//CCL19//ALAS2//ATP6V1G2//MFI2//CCR7//GIPR//GALR2//SYT1//ALDH5A1//BRSK1//ANXA2//PPP3CB//SULT1A…
GO:0022603	regulation of anatomical structure morphogenesis	Biological process	33	512	493	14742	1.92732	0.000249053	0.0342852	3.60371	BMP4//FN1//ITGB2//PALM//PLXNB1//FERMT2//MYH14//FGD3//HNF4A//TGFB2//CAPN3//ADORA2B//ANXA3//RUNX1//ECM1//GATA2//SERPINE1//PLCG1//PRKCB//SPHK1//PRKD2//ADM2//MAPT//CASP6//BAX//ACHE//AMIGO1//TLX2//PTPRF//CAPRIN2//RXRA//ETV5//DAB2
GO:0071842	cellular component organization at cellular level	Biological process	131	2963	493	14742	1.32205	0.000249376	0.0342852	3.60314	BECN1//ATG16L1//DCLRE1C//DST//MAPT//MID1//RAD21//CLIP1//DSN1//GEMIN4//PSIP1//ACD//TLK2//BAX//IFI6//GPX1//BBC3//HIST1H2BD//HIST1H2BB//H3F3B//HIST1H2BL//HIST1H2BC//HIST1H2BO//HIST2H2BE//HIST1H3F//HIST1H2AG//HIST2H3D//HIST2H2AA4//GSN//ABR//PDPK1//RAC2//SDCBP//FERMT2//NUAK2//FGD3//PALM//TPM1//AGXT//RNASEH1//BIRC7//NPM2//MBD3//TIMM17B//CASP6//SYNE1//CRYAA//HMGCL//TUBGCP5//KIF5B//PEX14//ACOT8//FAM109A/…
GO:0051049	regulation of transport	Biological process	48	851	493	14742	1.68664	0.000264161	0.0351829	3.57813	F2RL1//ADORA1//KEAP1//HNF4A//ITPR1//PPP3CB//RAP1B//TAC4//PTGS1//ADORA2B//ACSL5//RAE1//PRKCB//CAMK2D//INHA//SYT1//LGI3//ANXA2//GIPR//RBP4//CRYAA//OGG1//EDA//CCL19//SPHK1//ABR//CLCN2//SYTL4//PEA15//GHSR//NUDT4//IL11//SERPINE1//VTN//CCR7//ACHE//TGFB2//PANX1//NLRP1//GATA2//NRG1//CAPN3//CACNG2//CACNG6//MYLK//WFS1//BMP4//TNK2
GO:0032940	secretion by cell	Biological process	38	630	493	14742	1.80365	0.00032635	0.0421486	3.48632	F2RL1//CALU//FN1//SERPINE1//PROS1//TGFB2//STX3//EXOC8//SYT1//ALDH5A1//BRSK1//TNP2//HNF4A//ITPR1//PPP3CB//RAP1B//GNPTAB//PTGS1//ADORA2B//ADORA1//INHA//LGI3//VGF//GHSR//GIPR//RBP4//CGA//FZD4//ANXA3//ABR//SYTL4//IL11//CCR7//ACHE//PANX1//CCL19//NLRP1//AXL
GO:0051128	regulation of cellular component organization	Biological process	57	1075	493	14742	1.58554	0.000345906	0.0433604	3.46104	CAMK2D//SPOCK1//RASGRP2//FAM107A//TLK2//GSN//MAPT//MID1//CDC25C//FN1//ITGB2//PALM//PLXNB1//FERMT2//MYH14//FGD3//TGFB2//NEK6//CRYAA//NRG1//SPHK1//APBB1//DAB2//HNF4A//ING1//MYL2//RRAD//NDRG3//CAPRIN2//F2RL1//CCR7//MAPK8//DST//CLIP1//ANXA2//PTPRF//ACD//BAX//BBC3//TSC1//GATA2//EID1//CCL19//BMP4//EREG//SERPINE1//VTN//ACHE//ABR//AMIGO1//TLX2//TPM1//SHANK3//GHSR//PDPK1//BAG5//TNK2
GO:0000902	cell morphogenesis	Biological process	47	843	493	14742	1.66717	0.000396682	0.0483046	3.40156	DAB2//TGFB2//BMP4//APBB1//DST//BRSK1//CLTA//COL9A2//FYN//GRB2//PLCG1//PLXNB1//PSPN//RAC2//SDCBP//KLF7//FARP2//MYL9//MYH14//SEMA6D//AMIGO1//LHX4//FN1//ITGB2//PALM//FERMT2//FGD3//RXRA//RTN4RL2//AXL//FZD4//CBY1//STK36//CEP290//TTC8//MAPT//SLC1A3//PPP3CB//ACHE//TLX2//PTPRF//CAPRIN2//GSN//SHANK3//CRYAA//IL7R//STK4
GO:0050818	regulation of coagulation	Biological process	9	68	493	14742	3.9577	0.000414667	0.049092	3.3823	PROCR//TEC//F2RL1//GP1BA//SERPINE1//VTN//ANXA2//PLAU//KLKB1
GO:0032879	regulation of localization	Biological process	60	1157	493	14742	1.5507	0.000427016	0.0491097	3.36956	ADORA1//F2RL1//KEAP1//HNF4A//ITPR1//PPP3CB//RAP1B//TAC4//ANXA3//BMP4//PRKD2//PLCG1//TGFB2//PTGS1//ADORA2B//ACSL5//RAE1//PRKCB//CAMK2D//PLAU//VTN//SERPINE1//INHA//SYT1//LGI3//LAMA4//MYLK//SPHK1//WNT5B//ABR//TPM1//ANXA2//GIPR//RBP4//CRYAA//MAPK8//TBC1D1//OGG1//EDA//CCL19//CLCN2//SYTL4//PEA15//GHSR//NUDT4//IL11//CCR7//ACHE//PANX1//NLRP1//GATA2//NRG1//BBC3//CAPN3//CACNG2//CACNG6//WFS1//PDPK1//TNK2//S…
GO:0050819	negative regulation of coagulation	Biological process	7	42	493	14742	4.98377	0.000437862	0.0491097	3.35866	SERPINE1//VTN//ANXA2//GP1BA//PLAU//KLKB1//PROCR
GO:0071841	cellular component organization or biogenesis at cellular level	Biological process	133	3061	493	14742	1.29927	0.000468732	0.051224	3.32908	GTPBP5//BECN1//ATG16L1//DCLRE1C//DST//MAPT//MID1//RAD21//CLIP1//DSN1//GEMIN4//PSIP1//ACD//TLK2//BAX//IFI6//GPX1//BBC3//HIST1H2BD//HIST1H2BB//H3F3B//HIST1H2BL//HIST1H2BC//HIST1H2BO//HIST2H2BE//HIST1H3F//HIST1H2AG//HIST2H3D//HIST2H2AA4//GSN//ABR//PDPK1//RAC2//SDCBP//FERMT2//NUAK2//FGD3//PALM//TPM1//AGXT//RNASEH1//BIRC7//NPM2//MBD3//MPHOSPH10//TSC1//TIMM17B//CASP6//SYNE1//CRYAA//HMGCL//TUBGCP5//KIF5…
GO:0030030	cell projection organization	Biological process	46	829	493	14742	1.65925	0.000506913	0.0537604	3.29507	SDCBP//APBB1//DST//BRSK1//CLTA//COL9A2//FYN//GRB2//PLCG1//PLXNB1//PSPN//RAC2//KLF7//FARP2//MYL9//MYH14//SEMA6D//AMIGO1//LHX4//SPOCK1//SS18L1//RXRA//RTN4RL2//STX3//GALR2//CCR7//F2RL1//PTPRF//TPM1//MYLK//HNF4A//CBY1//STK36//CEP290//TTC8//MAPT//FGD3//PPP3CB//ACHE//TLX2//CAPRIN2//PALM//GSN//CCL19//SHANK3//TSC1
GO:0007399	nervous system development	Biological process	77	1590	493	14742	1.44812	0.000517169	0.0537604	3.28637	AXL//SPOCK1//MDGA1//STK4//TSC1//APBB1//DST//BRSK1//CLTA//COL9A2//FYN//GRB2//PLCG1//PLXNB1//PSPN//RAC2//SDCBP//KLF7//FARP2//MYL9//MYH14//SEMA6D//AMIGO1//ACHE//GJA10//ALDH5A1//POU6F2//ADAM22//CYP26C1//ABR//FOXL1//FZD4//LHX4//TGFB2//PLP1//GSN//SS18L1//SOX12//GATA2//UNCX//BMP4//SLC1A3//ANXA3//SHANK3//TUBB2A//WNT5B//EN1//CEP290//RXRA//RTN4RL2//STX3//GALR2//ETV5//TCF3//MAPT//TLX2//PPP3CB//RUNX1//RUNX3/…
GO:0050702	interleukin-1 beta secretion	Biological process	5	21	493	14742	7.11968	0.000534757	0.0540096	3.27184	CCR7//CCL19//NLRP1//PANX1//F2RL1
GO:0006323	DNA packaging	Biological process	14	151	493	14742	2.77243	0.000544911	0.0540096	3.26367	HIST1H2BD//HIST1H2BB//H3F3B//HIST1H2BL//HIST1H2BC//HIST1H2BO//HIST2H2BE//HIST1H3F//HIST1H2AG//HIST2H3D//HIST2H2AA4//CHMP1A//NCAPG//H1FNT
GO:0006259	DNA metabolic process	Biological process	46	836	493	14742	1.64536	0.00060662	0.0587595	3.21708	IL7R//ACHE//CDC25C//DBF4//GINS3//ING5//DCLRE1C//ACD//ZFYVE26//HIST1H2BD//HIST1H2BB//H3F3B//HIST1H2BL//HIST1H2BC//HIST1H2BO//HIST2H2BE//HIST1H3F//HIST1H2AG//HIST2H3D//HIST2H2AA4//RNASEH1//RPA4//EYA4//NUDT1//MUTYH//OGG1//POLR2D//USP1//RECQL5//BCCIP//C17ORF70//C1ORF124//HUWE1//RAD21//BAX//BIRC7//CHMP1A//NCAPG//PPFIBP2//PSIP1//H1FNT//TCF3//EREG//ANXA3//PRKD2//MYO18A
GO:0048519	negative regulation of biological process	Biological process	124	2838	493	14742	1.30653	0.000630137	0.059681	3.20057	CDC25C//DBF4//RPA4//BMP4//RUNX3//GATA2//RXRA//SIM2//ZMYND8//EID1//LMCD1//MBD3//HIST2H3D//UBTF//IL7R//PPP3CB//PTPRF//GIPR//ADORA1//KEAP1//GSN//CRYAA//IFI6//GPX1//NRG1//BECN1//PEA15//CFLAR//SPHK1//TIAF1//BIRC7//LHX4//AMIGO2//MYO18A//MAPT//MID1//APBB1//DST//INHA//TGFB2//TSC1//MAD2L1BP//CD164//ADAM22//PALM//ADORA2B//CD33//EREG//FABP6//HNF4A//ING1//STK4//ING5//PROCR//BAX//MAX//PTGS1//F2RL1//SPOCK1//FZ…
GO:0006334	nucleosome assembly	Biological process	11	105	493	14742	3.13266	0.000765972	0.070969	3.11579	HIST1H2BD//HIST1H2BB//H3F3B//HIST1H2BL//HIST1H2BC//HIST1H2BO//HIST2H2BE//HIST1H3F//HIST1H2AG//HIST2H3D//HIST2H2AA4
GO:0032611	interleukin-1 beta production	Biological process	6	34	493	14742	5.27694	0.000822141	0.0727812	3.08505	GHSR//F2RL1//CCR7//CCL19//NLRP1//PANX1
GO:0042730	fibrinolysis	Biological process	5	23	493	14742	6.50057	0.000836762	0.0727812	3.0774	SERPINE1//KLKB1//ANXA2//GP1BA//PLAU
GO:0050701	interleukin-1 secretion	Biological process	5	23	493	14742	6.50057	0.000836762	0.0727812	3.0774	F2RL1//CCR7//PANX1//CCL19//NLRP1
GO:0003008	system process	Biological process	75	1568	493	14742	1.43029	0.000877213	0.0747737	3.05689	SLC1A3//ACHE//RASD2//F2RL1//ADORA1//TCAP//TPM1//WFS1//MCAM//CHRNB1//MYLK//TPM4//UTRN//SSPN//GALR2//MYL9//ANXA6//MYL2//SRI//CAMK2D//EPB41L1//GRIA4//HTR1D//KCNJ1//P2RY11//PDPK1//PLP1//PRKCB//SDCBP//SYT1//KCNAB1//ALDH5A1//CACNG2//PANX1//KCNH5//CAMKK1//GJA10//BRSK1//CHRM1//ADORA2B//CLCN5//DAB2//CRYAA//EYA4//EFEMP1//POU6F2//FZD4//FYN//PPP3CB//OLR1//PTGS1//RENBP//ACSM3//TAC4//SPHK1//LMCD1//INHA//MME//R…
GO:0007267	cell-cell signaling	Biological process	53	1021	493	14742	1.55224	0.000915542	0.0765106	3.03832	SLC1A3//ACHE//RASD2//BMP4//CAMK2D//EPB41L1//GRIA4//HTR1D//KCNJ1//P2RY11//PDPK1//PLP1//PRKCB//SDCBP//SYT1//KCNAB1//ALDH5A1//GALR2//CACNG2//PANX1//KCNH5//CAMKK1//GJA10//BRSK1//CHRNB1//CHRM1//FOXL1//HNF4A//ITPR1//PPP3CB//RAP1B//ADORA1//INHA//VGF//GHSR//GIPR//RBP4//CGA//FZD4//SYTL4//IL11//RAPGEF2//SHANK3//C9ORF7//PTPRF//CD33//EREG//FGF13//GRB2//ITGB2//TGFB2//STC2//GDF15
GO:0030193	regulation of blood coagulation	Biological process	8	62	493	14742	3.8584	0.00102228	0.0811526	2.99043	TEC//SERPINE1//VTN//ANXA2//GP1BA//PLAU//KLKB1//F2RL1
GO:1900046	regulation of hemostasis	Biological process	8	62	493	14742	3.8584	0.00102228	0.0811526	2.99043	TEC//F2RL1//GP1BA//SERPINE1//VTN//ANXA2//PLAU//KLKB1
GO:0030947	regulation of vascular endothelial growth factor receptor signaling pathway	Biological process	5	24	493	14742	6.22972	0.00102821	0.0811526	2.98792	ARNT//PRKCB//VTN//PRKD2//FZD4
GO:0048522	positive regulation of cellular process	Biological process	122	2821	493	14742	1.2932	0.00105326	0.0816183	2.97746	BBC3//IL7R//PPP3CB//TAP1//BMP4//CRYAA//DAB2//FGF13//ARNT//ECM1//PRKD2//CCR7//UTRN//PLEKHA2//F2RL1//ADORA1//EREG//BAX//CASP4//CASP6//RUNX3//INHA//STK4//DPF1//TNFRSF25//SMNDC1//PHLDA1//NLRP1//ADORA2B//GIPR//GALR2//ADM2//P2RY11//CHRM1//FLT3LG//IL11//RAC2//SHMT2//TGFB2//ABR//MAPK8//CFLAR//FGD3//CCL19//ANXA3//PLCG1//GRB2//ACSL5//VTN//PLXNB1//CAPN3//HNF4A//BECN1//APBB1//RUNX1//ETV5//ING1//MITF//TCF3//F…
GO:0060341	regulation of cellular localization	Biological process	32	535	493	14742	1.78857	0.0010968	0.0834745	2.95987	F2RL1//KEAP1//HNF4A//ITPR1//PPP3CB//RAP1B//PTGS1//ADORA2B//CAMK2D//ADORA1//INHA//SYT1//LGI3//GIPR//RBP4//CRYAA//OGG1//EDA//CCL19//SPHK1//ABR//SYTL4//GHSR//NUDT4//IL11//CCR7//ACHE//TGFB2//PANX1//NLRP1//BMP4//PDPK1
GO:0030168	platelet activation	Biological process	17	219	493	14742	2.32121	0.00112739	0.0842972	2.94793	TEC//AXL//CALU//FN1//FYN//GP1BA//GRB2//IL11//ITPR1//SERPINE1//PDPK1//PRKCB//PROS1//RAC2//RAP1B//TGFB2//RASGRP2
GO:0048666	neuron development	Biological process	40	721	493	14742	1.65895	0.00117649	0.0864517	2.92941	APBB1//DST//BRSK1//CLTA//COL9A2//FYN//GRB2//PLCG1//PLXNB1//PSPN//RAC2//SDCBP//KLF7//FARP2//MYL9//MYH14//SEMA6D//AMIGO1//LHX4//SPOCK1//SS18L1//GATA2//RXRA//RTN4RL2//STX3//GALR2//CEP290//MAPT//SLC1A3//PPP3CB//ACHE//RUNX1//RUNX3//TLX2//PTPRF//CAPRIN2//SHANK3//PALM//EN1//TGFB2
GO:0030155	regulation of cell adhesion	Biological process	18	240	493	14742	2.2427	0.00120986	0.0873973	2.91726	TSC1//CCR7//UTRN//PLEKHA2//CD164//ADAM22//VTN//SPOCK1//FZD4//B4GALNT2//PLAU//SERPINE1//TGFB2//NRG1//TPM1//PRKD2//GSN//LAMA4
GO:0051050	positive regulation of transport	Biological process	26	408	493	14742	1.90556	0.00130334	0.0917832	2.88494	F2RL1//ADORA1//TAC4//ADORA2B//ACSL5//INHA//ANXA2//GIPR//RBP4//PPP3CB//EDA//CCL19//SPHK1//SYTL4//SERPINE1//VTN//ACHE//TGFB2//PANX1//NLRP1//ABR//GATA2//CAPN3//MYLK//WFS1//BMP4
GO:0071103	DNA conformation change	Biological process	15	184	493	14742	2.43771	0.00133166	0.0917832	2.87561	HIST1H2BD//HIST1H2BB//H3F3B//HIST1H2BL//HIST1H2BC//HIST1H2BO//HIST2H2BE//HIST1H3F//HIST1H2AG//HIST2H3D//HIST2H2AA4//CHMP1A//NCAPG//H1FNT//RECQL5
GO:0006996	organelle organization	Biological process	87	1904	493	14742	1.36635	0.00135024	0.0917832	2.86959	BECN1//ATG16L1//DCLRE1C//DST//MAPT//MID1//RAD21//CLIP1//DSN1//ACD//TLK2//BAX//IFI6//GPX1//BBC3//HIST1H2BD//HIST1H2BB//H3F3B//HIST1H2BL//HIST1H2BC//HIST1H2BO//HIST2H2BE//HIST1H3F//HIST1H2AG//HIST2H3D//HIST2H2AA4//GSN//ABR//PDPK1//RAC2//SDCBP//FERMT2//NUAK2//FGD3//PALM//TPM1//AGXT//RNASEH1//NPM2//MBD3//TIMM17B//SYNE1//CRYAA//HMGCL//TUBGCP5//PEX14//ACOT8//FAM109A//TUBB2A//NEK6//NCAPG//CHMP1A//CDC25C…
GO:0000904	cell morphogenesis involved in differentiation	Biological process	36	634	493	14742	1.69794	0.00137917	0.0917832	2.86038	TGFB2//BMP4//APBB1//DST//BRSK1//CLTA//COL9A2//FYN//GRB2//PLCG1//PLXNB1//PSPN//RAC2//SDCBP//KLF7//FARP2//MYL9//MYH14//SEMA6D//AMIGO1//LHX4//RXRA//RTN4RL2//AXL//FN1//FZD4//MAPT//SLC1A3//PPP3CB//ACHE//TLX2//PTPRF//CAPRIN2//SHANK3//CRYAA//DAB2
GO:0051094	positive regulation of developmental process	Biological process	34	589	493	14742	1.72613	0.00141644	0.0917832	2.8488	BMP4//TGFB2//CAPN3//FBN2//RUNX1//FLT3LG//IL7R//ZAP70//WNT5B//CCL19//ARNT//GATA2//ETV5//TCF3//ANXA3//ECM1//SERPINE1//PLCG1//PRKCB//SPHK1//PRKD2//ADM2//MAPT//CASP6//BAX//SHANK3//PLXNB1//AMIGO1//PTPRF//CAPRIN2//NRG1//PALM//MAPK8//CYP26B1
GO:0051046	regulation of secretion	Biological process	25	390	493	14742	1.91684	0.0014786	0.0917832	2.83015	F2RL1//ADORA1//HNF4A//ITPR1//PPP3CB//RAP1B//TAC4//PTGS1//ADORA2B//INHA//SYT1//LGI3//GIPR//RBP4//ABR//SYTL4//GHSR//IL11//CCR7//ACHE//TGFB2//PANX1//CCL19//NLRP1//NRG1
GO:0022607	cellular component assembly	Biological process	65	1343	493	14742	1.44726	0.0014876	0.0917832	2.82751	BECN1//ATG16L1//GEMIN4//PSIP1//HIST1H2BD//HIST1H2BB//H3F3B//HIST1H2BL//HIST1H2BC//HIST1H2BO//HIST2H2BE//HIST1H3F//HIST1H2AG//HIST2H3D//HIST2H2AA4//GSN//CAPN3//MAX//MITF//TCEB2//WAS//TCAP//MAGI1//SDCBP//CRYAA//NRG1//ACHE//GJA10//RAC2//CLP1//CCR7//MAPT//CLIP1//F2RL1//DST//MYLK//ACD//BAX//BBC3//HNF4A//PANX1//FERMT2//CBY1//STK36//CEP290//TTC8//PEX14//SYT1//LNX2//TPM1//FGD3//PDPK1//NEK6//TUBB2A//SHMT2…
GO:0090287	regulation of cellular response to growth factor stimulus	Biological process	5	26	493	14742	5.75051	0.001506	0.0917832	2.82217	FZD4//ARNT//PRKCB//VTN//PRKD2
GO:0030195	negative regulation of blood coagulation	Biological process	6	38	493	14742	4.72147	0.00150747	0.0917832	2.82175	ANXA2//GP1BA//SERPINE1//PLAU//KLKB1//VTN
GO:0032612	interleukin-1 production	Biological process	6	38	493	14742	4.72147	0.00150747	0.0917832	2.82175	GHSR//F2RL1//CCR7//PANX1//CCL19//NLRP1
GO:1900047	negative regulation of hemostasis	Biological process	6	38	493	14742	4.72147	0.00150747	0.0917832	2.82175	SERPINE1//VTN//ANXA2//GP1BA//PLAU//KLKB1
GO:0071844	cellular component assembly at cellular level	Biological process	51	998	493	14742	1.52809	0.00160284	0.0952934	2.79511	BECN1//ATG16L1//GEMIN4//PSIP1//HIST1H2BD//HIST1H2BB//H3F3B//HIST1H2BL//HIST1H2BC//HIST1H2BO//HIST2H2BE//HIST1H3F//HIST1H2AG//HIST2H3D//HIST2H2AA4//GSN//SDCBP//CRYAA//NRG1//ACHE//GJA10//WAS//RAC2//CAPN3//TCAP//CLP1//CCR7//MAPT//CLIP1//F2RL1//DST//MYLK//ACD//HNF4A//FERMT2//CBY1//STK36//CEP290//TTC8//TPM1//FGD3//PDPK1//NEK6//TUBB2A//PALM//TSC1//GHSR//MYL2//CCL19//BAG5//SHANK3
GO:0031497	chromatin assembly	Biological process	11	115	493	14742	2.86025	0.00162347	0.0952934	2.78956	HIST1H2BD//HIST1H2BB//H3F3B//HIST1H2BL//HIST1H2BC//HIST1H2BO//HIST2H2BE//HIST1H3F//HIST1H2AG//HIST2H3D//HIST2H2AA4
GO:0030949	positive regulation of vascular endothelial growth factor receptor signaling pathway	Biological process	4	16	493	14742	7.47566	0.0016322	0.0952934	2.78723	ARNT//PRKCB//VTN//PRKD2
GO:0006333	chromatin assembly or disassembly	Biological process	12	136	493	14742	2.63847	0.00203268	0.116561	2.69193	TLK2//HIST1H2BD//HIST1H2BB//H3F3B//HIST1H2BL//HIST1H2BC//HIST1H2BO//HIST2H2BE//HIST1H3F//HIST1H2AG//HIST2H3D//HIST2H2AA4
GO:0009605	response to external stimulus	Biological process	59	1209	493	14742	1.45927	0.00205282	0.116561	2.68765	BECN1//ATG16L1//CCR7//CCL19//KLKB1//ADORA1//F2RL1//ADORA2B//PLAU//CCRL2//CLTA//COL9A2//FYN//GRB2//PLCG1//PLXNB1//PSPN//RAC2//SDCBP//KLF7//FARP2//MYL9//MYH14//SEMA6D//GIPR//HMGCL//RXRA//STC2//ACSL5//PLEKHB1//LHX4//MAX//TEC//CAPN3//MAPK8//GP1BA//SERPINE1//VTN//ITGB2//TGFB2//SLC1A3//AXL//GHSR//RBP4//PRKD2//NUAK2//NUDT1//ANXA2//CHMP1A//NLRP1//ABR//GJA10//BMP4//TCAP//GSN//FZD4//CYP26B1//WNT5B//INHA
GO:0050706	regulation of interleukin-1 beta secretion	Biological process	4	17	493	14742	7.03591	0.00207851	0.116561	2.68225	CCL19//NLRP1//PANX1//CCR7
GO:0032651	regulation of interleukin-1 beta production	Biological process	5	28	493	14742	5.33976	0.00212969	0.11788	2.67168	GHSR//CCR7//CCL19//NLRP1//PANX1
GO:0030182	neuron differentiation	Biological process	46	890	493	14742	1.54553	0.00216995	0.118568	2.66355	APBB1//DST//BRSK1//CLTA//COL9A2//FYN//GRB2//PLCG1//PLXNB1//PSPN//RAC2//SDCBP//KLF7//FARP2//MYL9//MYH14//SEMA6D//AMIGO1//LHX4//SPOCK1//SS18L1//GATA2//MDGA1//SHANK3//RXRA//RTN4RL2//STX3//GALR2//CEP290//ETV5//TCF3//MAPT//EN1//TGFB2//SLC1A3//PPP3CB//ACHE//RUNX1//RUNX3//TLX2//PTPRF//CAPRIN2//PALM//TUBB2A//FZD4//WNT5B
GO:0010810	regulation of cell-substrate adhesion	Biological process	9	87	493	14742	3.09338	0.00246946	0.133226	2.6074	TSC1//CCR7//UTRN//PLEKHA2//VTN//SPOCK1//FZD4//PLAU//SERPINE1
GO:0050704	regulation of interleukin-1 secretion	Biological process	4	18	493	14742	6.64503	0.00260248	0.138647	2.58461	CCR7//PANX1//CCL19//NLRP1
GO:0045926	negative regulation of growth	Biological process	14	178	493	14742	2.35189	0.00265489	0.139693	2.57595	APBB1//DAB2//HNF4A//ING1//MYL2//RRAD//TGFB2//NDRG3//CAPRIN2//CGA//STK4//BMP4//BBC3//ING5
GO:0050714	positive regulation of protein secretion	Biological process	8	72	493	14742	3.32252	0.002707	0.140698	2.56751	F2RL1//PANX1//CCL19//NLRP1//RBP4//ACHE//TGFB2//SYTL4
GO:0010466	negative regulation of peptidase activity	Biological process	11	123	493	14742	2.67422	0.00277174	0.142327	2.55725	GPX1//SERPINE1//PROS1//RENBP//SPINK1//SPOCK1//VTN//CRYAA//IFI6//CFLAR//ECM1
GO:0034728	nucleosome organization	Biological process	11	124	493	14742	2.65265	0.00295255	0.149807	2.5298	HIST1H2BD//HIST1H2BB//H3F3B//HIST1H2BL//HIST1H2BC//HIST1H2BO//HIST2H2BE//HIST1H3F//HIST1H2AG//HIST2H3D//HIST2H2AA4
GO:0016573	histone acetylation	Biological process	10	107	493	14742	2.79464	0.00309083	0.153858	2.50992	GATA2//EID1//TCF3//PHF16//ING5//APBB1//PHF20//SRCAP//MBD3//TAF1L
GO:0006979	response to oxidative stress	Biological process	16	221	493	14742	2.1649	0.00315533	0.153858	2.50096	SERPINE1//ETV5//STX3//TPM1//CASP6//CRYAA//GPX1//MB//OLR1//ARNT//MTF1//NUDT1//OGG1//PTGS1//TPM4//PSIP1
GO:2000026	regulation of multicellular organismal development	Biological process	48	957	493	14742	1.49982	0.00316763	0.153858	2.49927	BMP4//HNF4A//TGFB2//RBM24//SPOCK1//CAPN3//PHOSPHO1//FBN2//ECM1//RUNX1//EFEMP1//FLT3LG//IL7R//GPX1//INHA//ZAP70//KEAP1//CCL19//GATA2//ARNT//ETV5//TCF3//ADORA2B//ANXA3//SERPINE1//PLCG1//PRKCB//SPHK1//PRKD2//ADM2//MAPT//LAMA4//CASP6//BAX//SHANK3//ACHE//PLXNB1//AMIGO1//TLX2//PTPRF//CAPRIN2//GHSR//RBP4//NRG1//RXRA//PALM//MAPK8//DAB2
GO:0010817	regulation of hormone levels	Biological process	22	347	493	14742	1.89584	0.0031768	0.153858	2.49801	CGA//SLC5A5//HNF4A//ITPR1//PPP3CB//RAP1B//SULT1A1//INHA//ARNT//VGF//GHSR//GIPR//RBP4//PTGS1//CYP26B1//CYP26C1//RETSAT//CRABP2//FZD4//SYTL4//ADORA1//IL11
GO:0048518	positive regulation of biological process	Biological process	129	3104	493	14742	1.24273	0.0033183	0.158618	2.47908	EREG//BBC3//IL7R//PPP3CB//TAP1//BMP4//CRYAA//DAB2//FGF13//ARNT//ECM1//PRKD2//CCR7//UTRN//PLEKHA2//MAPK8//CCL19//F2RL1//ADORA1//ADORA2B//TPM1//BAX//CASP4//CASP6//RUNX3//INHA//STK4//DPF1//TNFRSF25//SMNDC1//PHLDA1//NLRP1//GIPR//GALR2//ADM2//P2RY11//CHRM1//FLT3LG//IL11//RAC2//SHMT2//TGFB2//ABR//CFLAR//FGD3//PTGS1//SPHK1//TAC4//ANXA3//CAMK2D//PLP1//CYP26B1//PLCG1//GRB2//ACSL5//VTN//PLXNB1//CAPN3//HNF4…
GO:0006776	vitamin A metabolic process	Biological process	5	31	493	14742	4.82301	0.00339105	0.158618	2.46967	CYP26B1//CYP26C1//RBP4//RETSAT//CRABP2
GO:0032652	regulation of interleukin-1 production	Biological process	5	31	493	14742	4.82301	0.00339105	0.158618	2.46967	GHSR//CCR7//PANX1//CCL19//NLRP1
GO:0065007	biological regulation	Biological process	310	8387	493	14742	1.10526	0.00346721	0.158618	2.46002	IL7R//CDC25C//DBF4//RPA4//BCCIP//BMP4//RUNX3//GATA2//RXRA//SIM2//ZMYND8//EID1//LMCD1//MBD3//HIST2H3D//FGF13//RAPGEF2//UBTF//ADORA1//ADORA2B//DCLRE1C//ACD//SLC1A3//ACHE//SRI//CAMK2D//SPOCK1//RASGRP2//FAM107A//TLK2//EREG//BBC3//FAM109A//PPP3CB//TAP1//CRYAA//DAB2//ARNT//ECM1//PRKD2//TSC1//CCR7//UTRN//PLEKHA2//PTPRF//F2RL1//VGF//GIPR//MAPK8//KLKB1//CCL19//TPM1//WFS1//KEAP1//INHA//BTRC//GSN//CALU//FN1…
GO:0018193	peptidyl-amino acid modification	Biological process	32	576	493	14742	1.66126	0.00349502	0.158618	2.45655	SRCAP//MBD3//TAF1L//PROS1//TTLL1//MAPK8//STK4//NEK6//PRKD2//PDPK1//DYRK1A//EFEMP1//RAB6A//B4GALT5//GFPT2//ALG1//ALG8//ALG9//IL11//CAPRIN2//GATA2//EID1//PRKCB//HNF4A//TCF3//PHF16//ING5//APBB1//PHF20//ITGB2//VTN//TNK2
GO:0040008	regulation of growth	Biological process	28	484	493	14742	1.7299	0.00352522	0.158618	2.45281	CAMK2D//SPOCK1//RASGRP2//FAM107A//VGF//CAPN3//CRYAA//NRG1//TGFB2//SPHK1//APBB1//DAB2//HNF4A//ING1//MYL2//RRAD//NDRG3//CAPRIN2//GHSR//MAPT//BBC3//ING5//WFS1//CGA//STK4//RBP4//BMP4//UBE2E3
GO:0018393	internal peptidyl-lysine acetylation	Biological process	10	109	493	14742	2.74336	0.00353559	0.158618	2.45154	SRCAP//MBD3//TAF1L//GATA2//EID1//TCF3//PHF16//ING5//APBB1//PHF20
GO:0001525	angiogenesis	Biological process	21	330	493	14742	1.9029	0.00373696	0.164423	2.42748	STK4//CCBE1//BMP4//ADORA2B//ANXA3//RUNX1//ECM1//GATA2//SERPINE1//PLCG1//PRKCB//SPHK1//PRKD2//ADM2//MCAM//ANXA2//EREG//FN1//PLAU//TGFB2//WNT5B
GO:0050857	positive regulation of antigen receptor-mediated signaling pathway	Biological process	3	10	493	14742	8.97079	0.00374215	0.164423	2.42688	CCR7//PRKD2//PRKCB
GO:0009914	hormone transport	Biological process	15	205	493	14742	2.188	0.00379351	0.164979	2.42096	HNF4A//ITPR1//PPP3CB//RAP1B//INHA//VGF//GHSR//GIPR//RBP4//CGA//PTGS1//FZD4//SYTL4//ADORA1//IL11
GO:0018394	peptidyl-lysine acetylation	Biological process	10	111	493	14742	2.69393	0.00402968	0.171174	2.39473	SRCAP//MBD3//TAF1L//GATA2//EID1//TCF3//PHF16//ING5//APBB1//PHF20
GO:0048738	cardiac muscle tissue development	Biological process	10	111	493	14742	2.69393	0.00402968	0.171174	2.39473	TCAP//MYL2//NRG1//TSC1//CBY1//RXRA//TPM1//BMP4//TGFB2//RBP4
GO:0030031	cell projection assembly	Biological process	13	167	493	14742	2.32775	0.00405644	0.171174	2.39185	SDCBP//CCR7//F2RL1//MYLK//HNF4A//CBY1//STK36//CEP290//TTC8//FGD3//PALM//CCL19//RAC2
GO:0042692	muscle cell differentiation	Biological process	16	227	493	14742	2.10767	0.00409935	0.171289	2.38728	CACNG2//RBM24//CAPN3//TCAP//MYL2//TPM1//BMP4//CHRNB1//TCF3//EREG//NRG1//TSC1//CBY1//RXRA//CYP26B1//SYNE1
GO:0007268	synaptic transmission	Biological process	33	607	493	14742	1.62568	0.00423358	0.174028	2.37329	SLC1A3//ACHE//RASD2//SYT1//ALDH5A1//BRSK1//CHRNB1//CHRM1//ADORA1//PPP3CB//RAPGEF2//VGF//SHANK3//C9ORF7//PTPRF//GRIA4//GHSR//CAMK2D//EPB41L1//HTR1D//KCNJ1//P2RY11//PDPK1//PLP1//PRKCB//SDCBP//KCNAB1//GALR2//CACNG2//PANX1//KCNH5//CAMKK1//GJA10
GO:0065004	protein-DNA complex assembly	Biological process	11	130	493	14742	2.53022	0.00424657	0.174028	2.37196	HIST1H2BD//HIST1H2BB//H3F3B//HIST1H2BL//HIST1H2BC//HIST1H2BO//HIST2H2BE//HIST1H3F//HIST1H2AG//HIST2H3D//HIST2H2AA4
GO:0050900	leukocyte migration	Biological process	16	229	493	14742	2.08927	0.00446123	0.181084	2.35055	CCR7//CCL19//ADORA1//F2RL1//ITGB2//TGFB2//ZAP70//SERPINE1//STK10//FN1//FYN//GRB2//OLR1//PLCG1//PROS1//PPIL2
GO:0006325	chromatin organization	Biological process	29	516	493	14742	1.68057	0.0045246	0.181923	2.34442	TLK2//HIST1H2BD//HIST1H2BB//H3F3B//HIST1H2BL//HIST1H2BC//HIST1H2BO//HIST2H2BE//HIST1H3F//HIST1H2AG//HIST2H3D//HIST2H2AA4//NPM2//MBD3//APBB1//EYA4//PRKCB//SRCAP//SS18L1//ING5//TAF1L//HUWE1//MAPK8//GATA2//EID1//H1FNT//TCF3//PHF16//PHF20
GO:0006475	internal protein amino acid acetylation	Biological process	10	114	493	14742	2.62304	0.00487146	0.194039	2.31234	SRCAP//MBD3//TAF1L//GATA2//EID1//TCF3//PHF16//ING5//APBB1//PHF20
GO:0031589	cell-substrate adhesion	Biological process	14	191	493	14742	2.19182	0.00499501	0.196235	2.30146	TSC1//CCR7//UTRN//PLEKHA2//EDA//ITGB2//VTN//SPOCK1//FZD4//AXL//FN1//PDPK1//PLAU//SERPINE1
GO:0033540	fatty acid beta-oxidation using acyl-CoA oxidase	Biological process	3	11	493	14742	8.15526	0.00501867	0.196235	2.29941	ACOX1//ACOT8//CROT
GO:0050793	regulation of developmental process	Biological process	58	1235	493	14742	1.40433	0.00513848	0.199093	2.28917	BMP4//FN1//ITGB2//PALM//PLXNB1//FERMT2//MYH14//FGD3//HNF4A//TGFB2//RBM24//SPOCK1//CAPN3//PHOSPHO1//FBN2//ECM1//RUNX1//EFEMP1//FLT3LG//IL7R//GPX1//GATA2//INHA//ZAP70//UNCX//WNT5B//KEAP1//CCL19//ARNT//ETV5//TCF3//ADORA2B//ANXA3//SERPINE1//PLCG1//PRKCB//SPHK1//PRKD2//ADM2//MAPT//LAMA4//CASP6//BAX//SHANK3//ACHE//AMIGO1//TLX2//PTPRF//CAPRIN2//EREG//NRG1//GHSR//RBP4//RXRA//MAPK8//DAB2//NEK6//CYP26B1
GO:0048858	cell projection morphogenesis	Biological process	33	617	493	14742	1.59933	0.00540185	0.204233	2.26746	APBB1//DST//BRSK1//CLTA//COL9A2//FYN//GRB2//PLCG1//PLXNB1//PSPN//RAC2//SDCBP//KLF7//FARP2//MYL9//MYH14//SEMA6D//AMIGO1//LHX4//RXRA//RTN4RL2//CBY1//STK36//CEP290//TTC8//MAPT//PPP3CB//ACHE//TLX2//PTPRF//CAPRIN2//GSN//SHANK3
GO:0072358	cardiovascular system development	Biological process	36	689	493	14742	1.5624	0.0054149	0.204233	2.26641	ANXA2//EREG//FN1//SERPINE1//PLAU//TGFB2//ADM2//WNT5B//LAMA4//FZD4//STK4//CCBE1//BMP4//FOXL1//MB//MYL2//PPP3CB//RBP4//RXRA//SRI//TCAP//ADORA2B//ANXA3//RUNX1//ECM1//GATA2//PLCG1//PRKCB//SPHK1//PRKD2//NRG1//TSC1//CBY1//TPM1//MYLK//MCAM
GO:0072359	circulatory system development	Biological process	36	689	493	14742	1.5624	0.0054149	0.204233	2.26641	ANXA2//EREG//FN1//SERPINE1//PLAU//TGFB2//ADM2//WNT5B//LAMA4//FZD4//STK4//CCBE1//BMP4//FOXL1//MB//MYL2//PPP3CB//RBP4//RXRA//SRI//TCAP//ADORA2B//ANXA3//RUNX1//ECM1//GATA2//PLCG1//PRKCB//SPHK1//PRKD2//NRG1//TSC1//CBY1//TPM1//MYLK//MCAM
GO:0001954	positive regulation of cell-matrix adhesion	Biological process	4	22	493	14742	5.43684	0.00559726	0.207807	2.25202	TSC1//CCR7//UTRN//PLEKHA2
GO:0071887	leukocyte apoptosis	Biological process	6	49	493	14742	3.66155	0.00560719	0.207807	2.25125	BAX//BMP4//BBC3//BIRC7//CCR7//CCL19
GO:0048699	generation of neurons	Biological process	47	964	493	14742	1.45791	0.00590376	0.21333	2.22887	AXL//SPOCK1//MDGA1//APBB1//DST//BRSK1//CLTA//COL9A2//FYN//GRB2//PLCG1//PLXNB1//PSPN//RAC2//SDCBP//KLF7//FARP2//MYL9//MYH14//SEMA6D//AMIGO1//LHX4//SS18L1//GATA2//SHANK3//TUBB2A//FZD4//WNT5B//RXRA//RTN4RL2//STX3//GALR2//CEP290//ETV5//TCF3//MAPT//EN1//TGFB2//SLC1A3//PPP3CB//ACHE//RUNX1//RUNX3//TLX2//PTPRF//CAPRIN2//PALM
GO:0048513	organ development	Biological process	92	2141	493	14742	1.28493	0.00594498	0.21333	2.22585	UNCX//INHA//VGF//EREG//RBP4//TGFB2//AXL//TCF3//BMP4//MME//TSC1//WFS1//HMGCL//RXRA//ETNK2//ARNT//GATA2//WNT5B//CASP6//STK4//FOXL1//LY6H//TLE2//LHX4//ABR//FZD4//MDGA1//MB//MYL2//PPP3CB//SRI//TCAP//IL7R//ACHE//CAPN3//TAGLN//UTRN//CD164//CACNG2//CGA//CRABP2//KRT34//SPRR2F//WAS//PATZ1//RBM24//NRG1//CYP26C1//ANXA3//SHANK3//RUNX1//FLT3LG//IL11//DCLRE1C//ZAP70//ALAS2//TRIM10//TUFT1//CLCN2//SIM2//PHOSPHO1…
GO:0044085	cellular component biogenesis	Biological process	67	1477	493	14742	1.35645	0.00595365	0.21333	2.22522	GTPBP5//BECN1//ATG16L1//GEMIN4//PSIP1//HIST1H2BD//HIST1H2BB//H3F3B//HIST1H2BL//HIST1H2BC//HIST1H2BO//HIST2H2BE//HIST1H3F//HIST1H2AG//HIST2H3D//HIST2H2AA4//GSN//MPHOSPH10//TSC1//CAPN3//MAX//MITF//TCEB2//WAS//TCAP//MAGI1//SDCBP//CRYAA//NRG1//ACHE//GJA10//RAC2//CLP1//CCR7//MAPT//CLIP1//F2RL1//DST//MYLK//ACD//BAX//BBC3//HNF4A//PANX1//FERMT2//CBY1//STK36//CEP290//TTC8//PEX14//SYT1//LNX2//TPM1//FGD3//P…
GO:0051222	positive regulation of protein transport	Biological process	11	136	493	14742	2.4186	0.00595642	0.21333	2.22501	F2RL1//EDA//CCL19//SPHK1//ACHE//TGFB2//SYTL4//PANX1//NLRP1//RBP4//BMP4
GO:0050789	regulation of biological process	Biological process	293	7933	493	14742	1.10443	0.00607498	0.214273	2.21646	IL7R//CDC25C//DBF4//RPA4//BCCIP//BMP4//RUNX3//GATA2//RXRA//SIM2//ZMYND8//EID1//LMCD1//MBD3//HIST2H3D//FGF13//RAPGEF2//UBTF//ADORA1//ADORA2B//CAMK2D//SPOCK1//RASGRP2//FAM107A//TLK2//EREG//BBC3//FAM109A//PPP3CB//TAP1//ACHE//CRYAA//DAB2//ARNT//ECM1//PRKD2//TSC1//CCR7//UTRN//PLEKHA2//PTPRF//VGF//GIPR//MAPK8//KLKB1//CCL19//F2RL1//TPM1//KEAP1//INHA//BTRC//GSN//TLE2//FZD4//RNF138//WNT5B//APBB1//AXL//CAP…
GO:0007155	cell adhesion	Biological process	45	916	493	14742	1.46902	0.00613357	0.214273	2.21229	UNCX//CD164//AMIGO1//AMIGO2//TSC1//CCR7//UTRN//PLEKHA2//PTPRF//PCDHGA11//ITGB2//OLR1//EDA//VTN//ADAM22//SPOCK1//FZD4//CLDN1//B4GALNT2//GSN//LAMA4//PLAU//SERPINE1//TGFB2//AXL//FN1//NRG1//TPM1//PRKD2//PDPK1//ZAP70//STK10//ACHE//DST//CD33//COL4A6//COL12A1//EMR1//GP1BA//MCAM//TPBG//SSPN//MAGI1//EFS//FERMT2
GO:0022610	biological adhesion	Biological process	45	916	493	14742	1.46902	0.00613357	0.214273	2.21229	UNCX//CD164//AMIGO1//AMIGO2//TSC1//CCR7//UTRN//PLEKHA2//ACHE//DST//CD33//COL4A6//COL12A1//EMR1//FN1//GP1BA//ITGB2//MCAM//OLR1//PTPRF//SPOCK1//TPBG//VTN//SSPN//CLDN1//MAGI1//EFS//FERMT2//PCDHGA11//EDA//ADAM22//FZD4//B4GALNT2//GSN//LAMA4//PLAU//SERPINE1//TGFB2//AXL//NRG1//TPM1//PRKD2//PDPK1//ZAP70//STK10
GO:0051047	positive regulation of secretion	Biological process	14	197	493	14742	2.12506	0.00653006	0.220531	2.18508	F2RL1//ADORA1//TAC4//ADORA2B//INHA//GIPR//RBP4//PPP3CB//SYTL4//ACHE//TGFB2//PANX1//CCL19//NLRP1
GO:0006041	glucosamine metabolic process	Biological process	4	23	493	14742	5.20046	0.00659948	0.220531	2.18049	GNPDA1//RENBP//B4GALNT2//GFPT2
GO:0006044	N-acetylglucosamine metabolic process	Biological process	4	23	493	14742	5.20046	0.00659948	0.220531	2.18049	B4GALNT2//GFPT2//RENBP//GNPDA1
GO:0019226	transmission of nerve impulse	Biological process	35	674	493	14742	1.55281	0.00664768	0.220531	2.17733	SLC1A3//ACHE//RASD2//CAMK2D//EPB41L1//GRIA4//HTR1D//KCNJ1//P2RY11//PDPK1//PLP1//PRKCB//SDCBP//SYT1//KCNAB1//ALDH5A1//GALR2//CACNG2//PANX1//KCNH5//CAMKK1//GJA10//BRSK1//CHRNB1//CHRM1//ADORA1//TSC1//AMIGO1//PPP3CB//RAPGEF2//VGF//SHANK3//C9ORF7//PTPRF//GHSR
GO:0051716	cellular response to stimulus	Biological process	185	4754	493	14742	1.16365	0.00665479	0.220531	2.17687	BECN1//ATG16L1//RPA4//FGF13//RAPGEF2//ADORA2B//ZFYVE26//PTPRF//GIPR//MAPK8//CCR7//CCL19//F2RL1//BMP4//TLE2//FZD4//BTRC//RNF138//WNT5B//ADORA1//APBB1//AXL//CAPN3//CD33//CGA//CHRM1//CHRNB1//CRABP2//ECM1//EDA//FLT3LG//IL7R//INHA//ITPR1//PLAU//PLCG1//PLXNB1//PPP2R2B//PPP3CB//PRKCB//RAC2//RAP1B//RARB//RRAD//RTKN//SPOCK1//SRI//STK4//TNFRSF25//CD164//SPHK1//ZNF259//GDF15//RASGRP2//NEK6//RASD2//GPR173//P…
GO:0022008	neurogenesis	Biological process	49	1021	493	14742	1.43509	0.0066737	0.220531	2.17563	AXL//SPOCK1//MDGA1//APBB1//DST//BRSK1//CLTA//COL9A2//FYN//GRB2//PLCG1//PLXNB1//PSPN//RAC2//SDCBP//KLF7//FARP2//MYL9//MYH14//SEMA6D//AMIGO1//LHX4//TGFB2//PLP1//GSN//SS18L1//GATA2//SHANK3//TUBB2A//FZD4//WNT5B//RXRA//RTN4RL2//STX3//GALR2//CEP290//ETV5//TCF3//MAPT//EN1//SLC1A3//PPP3CB//ACHE//RUNX1//RUNX3//TLX2//PTPRF//CAPRIN2//PALM
GO:0032990	cell part morphogenesis	Biological process	33	626	493	14742	1.57634	0.00667492	0.220531	2.17555	APBB1//DST//BRSK1//CLTA//COL9A2//FYN//GRB2//PLCG1//PLXNB1//PSPN//RAC2//SDCBP//KLF7//FARP2//MYL9//MYH14//SEMA6D//AMIGO1//LHX4//RXRA//RTN4RL2//CBY1//STK36//CEP290//TTC8//MAPT//PPP3CB//ACHE//TLX2//PTPRF//CAPRIN2//GSN//SHANK3
GO:0048667	cell morphogenesis involved in neuron differentiation	Biological process	29	532	493	14742	1.63003	0.00685492	0.223074	2.164	APBB1//DST//BRSK1//CLTA//COL9A2//FYN//GRB2//PLCG1//PLXNB1//PSPN//RAC2//SDCBP//KLF7//FARP2//MYL9//MYH14//SEMA6D//AMIGO1//LHX4//RXRA//RTN4RL2//MAPT//PPP3CB//ACHE//TLX2//PTPRF//CAPRIN2//SHANK3//SLC1A3
GO:0010951	negative regulation of endopeptidase activity	Biological process	10	120	493	14742	2.49189	0.00696516	0.223074	2.15707	CRYAA//IFI6//GPX1//CFLAR//SERPINE1//PROS1//RENBP//SPINK1//SPOCK1//VTN
GO:0045765	regulation of angiogenesis	Biological process	11	139	493	14742	2.3664	0.00699343	0.223074	2.15531	ANXA3//RUNX1//ECM1//GATA2//SERPINE1//PLCG1//PRKCB//SPHK1//PRKD2//ADM2//ADORA2B
GO:0044057	regulation of system process	Biological process	23	394	493	14742	1.74559	0.00701413	0.223074	2.15403	ADORA1//TPM1//F2RL1//ANXA6//MYL9//MYL2//SRI//CAMK2D//ADORA2B//PTGS1//SPHK1//TAC4//LMCD1//INHA//ACHE//GHSR//TGFB2//PPP3CB//RAPGEF2//VGF//SHANK3//GRIA4//SLC1A3
GO:0048514	blood vessel morphogenesis	Biological process	23	394	493	14742	1.74559	0.00701413	0.223074	2.15403	ANXA2//EREG//FN1//SERPINE1//PLAU//TGFB2//ADM2//WNT5B//STK4//FZD4//CCBE1//BMP4//ADORA2B//ANXA3//RUNX1//ECM1//GATA2//PLCG1//PRKCB//SPHK1//PRKD2//MYLK//MCAM
GO:0035637	multicellular organismal signaling	Biological process	35	677	493	14742	1.54593	0.00710409	0.223074	2.14849	SLC1A3//ACHE//RASD2//CAMK2D//EPB41L1//GRIA4//HTR1D//KCNJ1//P2RY11//PDPK1//PLP1//PRKCB//SDCBP//SYT1//KCNAB1//ALDH5A1//GALR2//CACNG2//PANX1//KCNH5//CAMKK1//GJA10//BRSK1//CHRNB1//CHRM1//ADORA1//TSC1//AMIGO1//PPP3CB//RAPGEF2//VGF//SHANK3//C9ORF7//PTPRF//GHSR
GO:0046879	hormone secretion	Biological process	14	199	493	14742	2.1037	0.00711826	0.223074	2.14763	HNF4A//ITPR1//PPP3CB//RAP1B//INHA//VGF//GHSR//GIPR//RBP4//CGA//FZD4//SYTL4//ADORA1//IL11
GO:0061061	muscle structure development	Biological process	23	395	493	14742	1.74117	0.00722272	0.224695	2.1413	ACHE//CAPN3//SRI//TAGLN//UTRN//CD164//CACNG2//RBM24//TCAP//TCF3//SYNE1//MYL2//TPM1//BMP4//CHRNB1//EREG//NRG1//TSC1//CBY1//RXRA//RBP4//MYLK//CYP26B1
GO:0040007	growth	Biological process	37	727	493	14742	1.52187	0.00730597	0.224843	2.13632	EREG//IL7R//CAMK2D//SPOCK1//RASGRP2//FAM107A//CAPN3//CRYAA//NRG1//TGFB2//SPHK1//APBB1//DAB2//HNF4A//ING1//MYL2//RRAD//NDRG3//CAPRIN2//ETNK2//UBE2E3//GHSR//GSN//SERPINE1//PLAU//MAPT//BBC3//ING5//WFS1//CGA//STK4//PPP3CB//WNT5B//RXRA//RBP4//BMP4
GO:0001523	retinoid metabolic process	Biological process	5	37	493	14742	4.0409	0.00738434	0.224843	2.13169	CYP26B1//CYP26C1//RBP4//RETSAT//CRABP2
GO:0006941	striated muscle contraction	Biological process	7	68	493	14742	3.07821	0.00747804	0.224843	2.12621	TCAP//MYL2//SRI//CAMK2D//MB//ADORA1//TPM1
GO:0001952	regulation of cell-matrix adhesion	Biological process	6	52	493	14742	3.4503	0.00750715	0.224843	2.12452	CCR7//UTRN//PLEKHA2//TSC1//PLAU//SERPINE1
GO:0055007	cardiac muscle cell differentiation	Biological process	6	52	493	14742	3.4503	0.00750715	0.224843	2.12452	MYL2//TCAP//NRG1//RXRA//TSC1//CBY1
GO:0051146	striated muscle cell differentiation	Biological process	12	160	493	14742	2.2427	0.00754402	0.224843	2.1224	CACNG2//RBM24//CAPN3//TCAP//TPM1//BMP4//CHRNB1//NRG1//MYL2//TSC1//CBY1//RXRA
GO:0031175	neuron projection development	Biological process	33	632	493	14742	1.56137	0.00765603	0.226597	2.116	APBB1//DST//BRSK1//CLTA//COL9A2//FYN//GRB2//PLCG1//PLXNB1//PSPN//RAC2//SDCBP//KLF7//FARP2//MYL9//MYH14//SEMA6D//AMIGO1//LHX4//SPOCK1//SS18L1//RXRA//RTN4RL2//MAPT//PPP3CB//ACHE//TLX2//PTPRF//CAPRIN2//SHANK3//PALM//STX3//GALR2
GO:0050794	regulation of cellular process	Biological process	278	7509	493	14742	1.10706	0.00773908	0.227476	2.11131	IL7R//CDC25C//DBF4//RPA4//BCCIP//BMP4//RUNX3//GATA2//RXRA//SIM2//ZMYND8//EID1//LMCD1//MBD3//HIST2H3D//FGF13//RAPGEF2//UBTF//ADORA1//ADORA2B//CAMK2D//SPOCK1//RASGRP2//FAM107A//TLK2//BBC3//PPP3CB//TAP1//ACHE//CRYAA//DAB2//ARNT//ECM1//PRKD2//TSC1//CCR7//UTRN//PLEKHA2//PTPRF//GIPR//MAPK8//F2RL1//KEAP1//INHA//BTRC//GSN//TLE2//FZD4//RNF138//WNT5B//APBB1//AXL//CAPN3//CD33//CGA//CHRM1//CHRNB1//CRABP2//ED…
GO:0050708	regulation of protein secretion	Biological process	9	104	493	14742	2.58773	0.00805565	0.230558	2.0939	F2RL1//CCR7//ACHE//TGFB2//SYTL4//PANX1//CCL19//NLRP1//RBP4
GO:0051048	negative regulation of secretion	Biological process	9	104	493	14742	2.58773	0.00805565	0.230558	2.0939	ADORA1//PTGS1//INHA//ABR//GHSR//SYTL4//IL11//F2RL1//NRG1
GO:0006473	protein acetylation	Biological process	10	123	493	14742	2.43111	0.0082442	0.230558	2.08385	SRCAP//MBD3//TAF1L//GATA2//EID1//TCF3//PHF16//ING5//APBB1//PHF20
GO:2000106	regulation of leukocyte apoptosis	Biological process	5	38	493	14742	3.93456	0.00827477	0.230558	2.08224	BMP4//BBC3//BIRC7//CCR7//CCL19
GO:0002704	negative regulation of leukocyte mediated immunity	Biological process	3	13	493	14742	6.90061	0.00827671	0.230558	2.08214	IL7R//PPP3CB//TAP1
GO:0002707	negative regulation of lymphocyte mediated immunity	Biological process	3	13	493	14742	6.90061	0.00827671	0.230558	2.08214	IL7R//PPP3CB//TAP1
GO:0003094	glomerular filtration	Biological process	3	13	493	14742	6.90061	0.00827671	0.230558	2.08214	ADORA1//F2RL1//MCAM
GO:0097205	renal filtration	Biological process	3	13	493	14742	6.90061	0.00827671	0.230558	2.08214	ADORA1//MCAM//F2RL1
GO:0048646	anatomical structure formation involved in morphogenesis	Biological process	36	712	493	14742	1.51193	0.00891584	0.246621	2.04984	ANXA2//EREG//FN1//SERPINE1//PLAU//TGFB2//ADM2//WNT5B//STK4//TLX2//TCAP//TSC1//CCBE1//BMP4//CAPN3//CEP290//CBY1//STK36//TTC8//TPM1//ADORA2B//ANXA3//RUNX1//ECM1//GATA2//PLCG1//PRKCB//SPHK1//PRKD2//MYL2//FBN2//RBP4//EDA//MCAM//DLX6//GRB2
GO:0032874	positive regulation of stress-activated MAPK cascade	Biological process	6	54	493	14742	3.32252	0.00900723	0.246621	2.04541	CCR7//F2RL1//CCL19//SDCBP//MID1//TGFB2
GO:0051130	positive regulation of cellular component organization	Biological process	23	403	493	14742	1.7066	0.00908147	0.246621	2.04184	TGFB2//F2RL1//CCR7//MAPT//CLIP1//ANXA2//BAX//BBC3//CCL19//EREG//SERPINE1//VTN//ABR//GATA2//PLXNB1//AMIGO1//PTPRF//CAPRIN2//PALM//TPM1//SHANK3//TSC1//PDPK1
GO:0045785	positive regulation of cell adhesion	Biological process	9	106	493	14742	2.5389	0.00908483	0.246621	2.04168	CCR7//UTRN//PLEKHA2//VTN//TGFB2//TSC1//NRG1//TPM1//PRKD2
GO:0042221	response to chemical stimulus	Biological process	109	2641	493	14742	1.23415	0.00915548	0.246966	2.03832	SERPINE1//ADORA1//ALAS2//ARNT//CRYAA//ITPR1//MB//PLAU//TGFB2//PTPRF//PPP3CB//CCR7//CCL19//F2RL1//CREB3L1//SYT1//HNF4A//NNMT//PTGS1//SULT1A1//CYP26B1//CYP26C1//CCRL2//GPX1//MTF1//NUDT1//OGG1//TPM4//PSIP1//WFS1//CLTA//COL9A2//FYN//GRB2//PLCG1//PLXNB1//PSPN//RAC2//SDCBP//KLF7//FARP2//MYL9//MYH14//SEMA6D//GIPR//HMGCL//RXRA//STC2//ACSL5//LHX4//ATP6V1G2//PDPK1//TSC1//CAPN3//ABCB1//ABCB4//PPOX//SLC1A3//…
GO:0016101	diterpenoid metabolic process	Biological process	5	39	493	14742	3.83367	0.00923694	0.247596	2.03447	CYP26B1//CYP26C1//RBP4//RETSAT//CRABP2
GO:0071824	protein-DNA complex subunit organization	Biological process	11	145	493	14742	2.26848	0.00948689	0.252707	2.02288	HIST1H2BD//HIST1H2BB//H3F3B//HIST1H2BL//HIST1H2BC//HIST1H2BO//HIST2H2BE//HIST1H3F//HIST1H2AG//HIST2H3D//HIST2H2AA4
GO:0030048	actin filament-based movement	Biological process	6	55	493	14742	3.26211	0.00983251	0.257651	2.00734	MYL2//TPM1//TPM4//TCAP//WAS//MYH14
GO:0070304	positive regulation of stress-activated protein kinase signaling cascade	Biological process	6	55	493	14742	3.26211	0.00983251	0.257651	2.00734	MID1//TGFB2//CCR7//F2RL1//CCL19//SDCBP
GO:0032880	regulation of protein localization	Biological process	18	293	493	14742	1.83702	0.00985384	0.257651	2.00639	F2RL1//KEAP1//OGG1//HNF4A//EDA//CCL19//SPHK1//CCR7//ACHE//TGFB2//SYTL4//PANX1//NLRP1//RBP4//BMP4//PDPK1//MAPK8//TBC1D1
GO:0048523	negative regulation of cellular process	Biological process	107	2594	493	14742	1.23345	0.0100178	0.260342	1.99923	CDC25C//DBF4//RPA4//BMP4//RUNX3//GATA2//RXRA//SIM2//ZMYND8//EID1//LMCD1//MBD3//HIST2H3D//UBTF//PTPRF//GIPR//ADORA1//KEAP1//GSN//CRYAA//IFI6//GPX1//NRG1//BECN1//PEA15//CFLAR//SPHK1//TIAF1//BIRC7//LHX4//AMIGO2//MYO18A//MAPT//MID1//APBB1//DST//INHA//TGFB2//TSC1//MAD2L1BP//CD164//ADAM22//PALM//ADORA2B//CD33//EREG//FABP6//HNF4A//ING1//STK4//ING5//BAX//PTGS1//F2RL1//SPOCK1//FZD4//SERPINE1//BCL7A//CAPN3…
GO:0035051	cardiac cell differentiation	Biological process	7	72	493	14742	2.9072	0.0101446	0.261234	1.99376	TGFB2//MYL2//TCAP//NRG1//TSC1//CBY1//RXRA
GO:0001779	natural killer cell differentiation	Biological process	3	14	493	14742	6.40771	0.0102758	0.261234	1.98818	FLT3LG//AXL//TCF3
GO:0009264	deoxyribonucleotide catabolic process	Biological process	3	14	493	14742	6.40771	0.0102758	0.261234	1.98818	NUDT1//MUTYH//OGG1
GO:0048384	retinoic acid receptor signaling pathway	Biological process	4	26	493	14742	4.60041	0.0102974	0.261234	1.98727	CYP26B1//CYP26C1//RARB//RXRA
GO:0051649	establishment of localization in cell	Biological process	71	1621	493	14742	1.30974	0.0103721	0.261573	1.98413	RAB6A//F2RL1//CALU//FN1//SERPINE1//PROS1//TGFB2//KEAP1//ING1//AGXT//RAE1//RNPS1//TSC1//XPO6//ADORA1//SDCBP//AP3M1//TIMM17B//KIAA1279//CLTA//STX3//ACD//SYTL4//EXOC8//COG5//SYT1//ALDH5A1//BRSK1//TNP2//HNF4A//ITPR1//PPP3CB//RAP1B//KLC2//DST//GNPTAB//PTGS1//ADORA2B//CAMK2D//WAS//CHMP2B//PEX14//INHA//LGI3//TAP1//VGF//GHSR//GIPR//RBP4//CGA//CRYAA//AXL//OGG1//FAM109A//EDA//CCL19//SPHK1//FZD4//ANXA3//ABR…
GO:0007249	I-kappaB kinase/NF-kappaB cascade	Biological process	14	209	493	14742	2.00305	0.0107214	0.268791	1.96975	EDA//CCL19//SPHK1//CAPN3//F2RL1//PDPK1//BTRC//CCR7//ECM1//PRKCB//CFLAR//TRAF3IP2//NEK6//TIAF1
GO:0030029	actin filament-based process	Biological process	23	410	493	14742	1.67746	0.0110112	0.274444	1.95816	GSN//ABR//PDPK1//RAC2//SDCBP//FERMT2//NUAK2//FGD3//CRYAA//GHSR//WAS//MYH14//MYL2//TPM1//TPM4//TCAP//CAPN3//F2RL1//CCR7//EPB41L1//EPB41L3//MYO18A//TSC1
GO:0070201	regulation of establishment of protein localization	Biological process	16	253	493	14742	1.89108	0.0112092	0.277754	1.95042	F2RL1//KEAP1//OGG1//HNF4A//EDA//CCL19//SPHK1//CCR7//ACHE//TGFB2//SYTL4//PANX1//NLRP1//RBP4//BMP4//PDPK1
GO:0006810	transport	Biological process	135	3387	493	14742	1.19187	0.0114207	0.281357	1.94231	RAB6A//SLC1A3//F2RL1//CALU//FN1//SERPINE1//PROS1//TGFB2//ADORA1//KEAP1//GSN//CHMP1A//AP3M1//TRAPPC5//ING1//AGXT//RAE1//RNPS1//TSC1//XPO6//SDCBP//TIMM17B//ATP6V1G2//CLCN2//CLCN5//GRIA4//ITPR1//KCNJ1//MFI2//SLC5A5//SLC12A3//KCNAB1//CACNG2//KCNH5//CACNG6//WNK4//PKD1L2//KCNU1//CHRNB1//PANX1//KCTD6//ANXA6//CAMK2D//FYN//SRI//STX3//KIAA1279//HDLBP//CLTA//ACD//SYTL4//EXOC8//COG5//TNK2//DAB2//ANXA3//SYT1/…
GO:0023051	regulation of signaling	Biological process	77	1789	493	14742	1.28703	0.0114872	0.28137	1.93979	ADORA2B//FAM109A//ACHE//PTPRF//GIPR//ADORA1//EREG//CCL19//BIRC7//HNF4A//ITPR1//PPP3CB//RAP1B//GPSM3//SPRY4//SERPINE1//PLAU//SPHK1//F2RL1//BMP4//PLXNB1//TGFB2//INHA//SMURF2//CCR7//PRKD2//FOXL1//CBY1//PDPK1//FZD4//ARNT//PRKCB//VTN//TSC1//RBP4//RAPGEF2//MID1//ABR//FARP2//FGD3//FBN2//CLTA//GRB2//CAPN3//BTRC//ECM1//EDA//CFLAR//TRAF3IP2//NEK6//STK38//IL11//GHSR//RASD2//GATA2//STK36//SDCBP//SYTL4//VGF//…
GO:0045807	positive regulation of endocytosis	Biological process	6	57	493	14742	3.14765	0.011642	0.28195	1.93397	SERPINE1//CCL19//VTN//ABR//GATA2//F2RL1
GO:0001558	regulation of cell growth	Biological process	17	276	493	14742	1.84183	0.0116453	0.28195	1.93385	CRYAA//NRG1//TGFB2//SPHK1//APBB1//DAB2//HNF4A//ING1//MYL2//RRAD//NDRG3//CAPRIN2//MAPT//CAMK2D//SPOCK1//RASGRP2//FAM107A
GO:0006939	smooth muscle contraction	Biological process	7	74	493	14742	2.82863	0.0117108	0.28195	1.93141	PTGS1//SPHK1//MYLK//HTR1D//GHSR//ADORA1//ADORA2B
GO:0006040	amino sugar metabolic process	Biological process	4	27	493	14742	4.43002	0.0117755	0.28195	1.92902	GNPDA1//RENBP//B4GALNT2//GFPT2
GO:0006887	exocytosis	Biological process	16	255	493	14742	1.87624	0.0120169	0.286123	1.92021	CALU//FN1//SERPINE1//PROS1//TGFB2//TNP2//SYT1//PPP3CB//LGI3//ADORA2B//F2RL1//ANXA3//ABR//SYTL4//STX3//EXOC8
GO:0051223	regulation of protein transport	Biological process	15	234	493	14742	1.91684	0.0123148	0.289565	1.90957	F2RL1//KEAP1//OGG1//HNF4A//EDA//CCL19//SPHK1//CCR7//ACHE//TGFB2//SYTL4//PANX1//NLRP1//RBP4//BMP4
GO:0001914	regulation of T cell mediated cytotoxicity	Biological process	3	15	493	14742	5.98053	0.0125305	0.289565	1.90203	IL7R//PPP3CB//TAP1
GO:0050718	positive regulation of interleukin-1 beta secretion	Biological process	3	15	493	14742	5.98053	0.0125305	0.289565	1.90203	CCL19//NLRP1//PANX1
GO:0006940	regulation of smooth muscle contraction	Biological process	5	42	493	14742	3.55984	0.0125799	0.289565	1.90032	PTGS1//SPHK1//GHSR//ADORA1//ADORA2B
GO:0031032	actomyosin structure organization	Biological process	5	42	493	14742	3.55984	0.0125799	0.289565	1.90032	CAPN3//TCAP//TPM1//MYL2//MYO18A
GO:0060491	regulation of cell projection assembly	Biological process	5	42	493	14742	3.55984	0.0125799	0.289565	1.90032	CCR7//F2RL1//HNF4A//PALM//CCL19
GO:0010646	regulation of cell communication	Biological process	58	1292	493	14742	1.34238	0.0126371	0.289565	1.89835	PTPRF//GIPR//ADORA1//EREG//HNF4A//ITPR1//PPP3CB//RAP1B//F2RL1//BMP4//PLXNB1//TGFB2//BECN1//INHA//CCR7//PRKD2//CBY1//PDPK1//ARNT//PRKCB//VTN//TSC1//RBP4//ACHE//MID1//FBN2//CLTA//GRB2//ECM1//EDA//CCL19//CFLAR//TRAF3IP2//NEK6//IL11//GHSR//GATA2//BTRC//STK36//SDCBP//SYTL4//RAPGEF2//VGF//SHANK3//CYP26B1//CYP26C1//GRIA4//SLC1A3//RASD2//PALM//LMCD1//DAB2//STK4//TLE2//WNT5B//CAPRIN2//BAX//BBC3
GO:0043122	regulation of I-kappaB kinase/NF-kappaB cascade	Biological process	12	172	493	14742	2.08623	0.0129726	0.295664	1.88697	CCR7//ECM1//EDA//F2RL1//PRKCB//CCL19//CFLAR//TRAF3IP2//NEK6//CAPN3//PDPK1//BTRC
GO:0030036	actin cytoskeleton organization	Biological process	21	370	493	14742	1.69718	0.013055	0.295959	1.88422	GSN//CRYAA//GHSR//WAS//CAPN3//TCAP//F2RL1//CCR7//EPB41L1//EPB41L3//MYO18A//TSC1//TPM1//MYL2//ABR//PDPK1//RAC2//SDCBP//FERMT2//NUAK2//FGD3
GO:0016358	dendrite development	Biological process	8	94	493	14742	2.54491	0.013359	0.300205	1.87423	KLF7//ACHE//TLX2//PTPRF//CAPRIN2//SHANK3//PALM//SS18L1
GO:0060038	cardiac muscle cell proliferation	Biological process	4	28	493	14742	4.27181	0.0133831	0.300205	1.87344	RBP4//NRG1//RXRA//TGFB2
GO:0044237	cellular metabolic process	Biological process	299	8211	493	14742	1.08889	0.0134603	0.300356	1.87094	IL7R//ACOX1//BECN1//ATG16L1//ACHE//CDC25C//DBF4//GINS3//ING5//BCCIP//BMP4//RUNX3//GATA2//RXRA//SIM2//ZMYND8//EID1//LMCD1//MBD3//HIST2H3D//UBTF//RNPS1//PAN3//ADORA1//ADORA2B//BTRC//HUWE1//PPIL2//UBE2L6//TRIP12//HERC4//SMURF2//MPHOSPH10//SMNDC1//GEMIN4//PSIP1//GTF2F2//POLR2D//CLP1//DCLRE1C//ACD//ZFYVE26//PTGS1//PLA2G4F//TRUB2//RPUSD2//SLC27A2//FAM109A//CRYAA//DAB2//FGF13//MAX//TCEB2//RDBP//POU6F2//…
GO:0048812	neuron projection morphogenesis	Biological process	28	537	493	14742	1.55917	0.0136465	0.30197	1.86498	APBB1//DST//BRSK1//CLTA//COL9A2//FYN//GRB2//PLCG1//PLXNB1//PSPN//RAC2//SDCBP//KLF7//FARP2//MYL9//MYH14//SEMA6D//AMIGO1//LHX4//RXRA//RTN4RL2//MAPT//PPP3CB//ACHE//TLX2//PTPRF//CAPRIN2//SHANK3
GO:0051238	sequestering of metal ion	Biological process	6	59	493	14742	3.04095	0.0136744	0.30197	1.86409	SRI//CCR7//CCL19//BBC3
GO:0046888	negative regulation of hormone secretion	Biological process	5	43	493	14742	3.47705	0.0138546	0.302811	1.85841	INHA//GHSR//SYTL4//ADORA1//IL11
GO:0048010	vascular endothelial growth factor receptor signaling pathway	Biological process	5	43	493	14742	3.47705	0.0138546	0.302811	1.85841	FZD4//ARNT//PRKCB//VTN//PRKD2
GO:0051346	negative regulation of hydrolase activity	Biological process	14	216	493	14742	1.93813	0.0139968	0.304359	1.85397	ECM1//TGFB2//KIAA0430//MPHOSPH10//GPX1//SERPINE1//PROS1//RENBP//SPINK1//SPOCK1//VTN//CRYAA//IFI6//CFLAR
GO:0051641	cellular localization	Biological process	77	1806	493	14742	1.27492	0.0142234	0.307716	1.847	RAB6A//BBC3//F2RL1//CALU//FN1//SERPINE1//PROS1//TGFB2//KEAP1//ING1//AGXT//RAE1//RNPS1//TSC1//XPO6//ADORA1//SDCBP//AP3M1//TIMM17B//KIAA1279//SRI//CLTA//STX3//ACD//SYTL4//EXOC8//COG5//SYT1//ALDH5A1//BRSK1//TNP2//HNF4A//ITPR1//PPP3CB//RAP1B//KLC2//DST//GNPTAB//PTGS1//ADORA2B//CAMK2D//WAS//CHMP2B//PEX14//INHA//LGI3//TAP1//VGF//GHSR//GIPR//RBP4//CGA//CRYAA//AXL//OGG1//BMP4//FAM109A//EDA//CCL19//SPHK1/…
GO:0030335	positive regulation of cell migration	Biological process	13	196	493	14742	1.98334	0.0147105	0.314921	1.83237	F2RL1//ANXA3//BMP4//PRKD2//PLCG1//TGFB2//VTN//CCR7//CCL19//SERPINE1//MYLK//SPHK1//WNT5B
GO:0051234	establishment of localization	Biological process	136	3442	493	14742	1.18151	0.0147543	0.314921	1.83108	RAB6A//SLC1A3//BBC3//F2RL1//CALU//FN1//SERPINE1//PROS1//TGFB2//ADORA1//KEAP1//GSN//CHMP1A//AP3M1//TRAPPC5//ING1//AGXT//RAE1//RNPS1//TSC1//XPO6//SDCBP//TIMM17B//CLCN2//CLCN5//GRIA4//HDLBP//MB//ABCB1//ABCB4//CLIP1//SDHC//SLC5A5//SLC12A3//SRI//PEA15//CACNG2//CROT//CYB561D1//ATP6V1G2//ITPR1//KCNJ1//MFI2//KCNAB1//KCNH5//CACNG6//WNK4//PKD1L2//KCNU1//CHRNB1//PANX1//KCTD6//ANXA6//CAMK2D//FYN//STX3//KIAA1…
GO:0048813	dendrite morphogenesis	Biological process	6	60	493	14742	2.99026	0.0147781	0.314921	1.83038	ACHE//TLX2//PTPRF//CAPRIN2//SHANK3//KLF7
GO:0050716	positive regulation of interleukin-1 secretion	Biological process	3	16	493	14742	5.60674	0.0150455	0.319024	1.82259	PANX1//CCL19//NLRP1
GO:0014855	striated muscle cell proliferation	Biological process	4	29	493	14742	4.1245	0.0151238	0.319098	1.82034	RXRA//TGFB2//RBP4//NRG1
GO:0001568	blood vessel development	Biological process	24	446	493	14742	1.60911	0.0152237	0.319624	1.81748	ANXA2//EREG//FN1//SERPINE1//PLAU//TGFB2//ADM2//WNT5B//STK4//FZD4//CCBE1//BMP4//ADORA2B//ANXA3//RUNX1//ECM1//GATA2//PLCG1//PRKCB//SPHK1//PRKD2//MYLK//MCAM//LAMA4
GO:0051241	negative regulation of multicellular organismal process	Biological process	18	307	493	14742	1.75325	0.0153097	0.319852	1.81503	ADORA1//PROCR//TGFB2//SERPINE1//VTN//ECM1//ACHE//UBE2L6//GHSR//AXL//ADORA2B//ANXA2//GP1BA//PLAU//KLKB1//RBP4//BMP4//F2RL1
GO:0051240	positive regulation of multicellular organismal process	Biological process	23	423	493	14742	1.62591	0.0154654	0.320872	1.81064	EREG//TPM1//F2RL1//ADORA2B//PTGS1//SPHK1//TAC4//ARNT//CAMK2D//SERPINE1//BMP4//FBN2//CCR7//CCL19//PRKD2//GHSR//TGFB2//PANX1//NLRP1//SLC1A3//GRIA4//SHANK3//NRG1
GO:0065003	macromolecular complex assembly	Biological process	41	866	493	14742	1.41571	0.0155091	0.320872	1.80941	GEMIN4//PSIP1//HIST1H2BD//HIST1H2BB//H3F3B//HIST1H2BL//HIST1H2BC//HIST1H2BO//HIST2H2BE//HIST1H3F//HIST1H2AG//HIST2H3D//HIST2H2AA4//GSN//CAPN3//MAX//MITF//TCEB2//WAS//TCAP//MAGI1//CRYAA//NRG1//CLP1//CCR7//MAPT//CLIP1//BAX//BBC3//PANX1//PEX14//SYT1//ATG16L1//LNX2//ACHE//TUBB2A//SHMT2//ALDH5A1//GRB2//TSC1//TRIM34
GO:0043412	macromolecule modification	Biological process	97	2360	493	14742	1.22905	0.0157561	0.324182	1.80255	CDC25C//BCCIP//ADORA1//BMP4//ADORA2B//BTRC//HUWE1//PPIL2//TRIP12//HERC4//SMURF2//TRUB2//RPUSD2//CRYAA//DAB2//FGF13//EREG//UBE2L6//TNK2//BIRC7//CHRM1//STK38//TTLL1//TTLL9//CAMK2D//RUNX3//DYRK1A//FYN//MYLK//PDPK1//POLR2D//PPP3CB//PRKCB//PRKY//STK4//STK10//TEC//TGFB2//ZAP70//NEK6//TLK2//PRKD2//STK36//WNK4//ADM2//NUAK2//BRSK1//PPM1B//PTPRD//MTMR4//ILKAP//ING5//B3GALT4//ALG1//B4GALNT2//ALG8//GFPT2//AL…
GO:0010469	regulation of receptor activity	Biological process	6	61	493	14742	2.94124	0.0159422	0.324182	1.79745	ADORA1//EREG//CACNG2//SHANK3//SERPINE1//PLAU
GO:0007160	cell-matrix adhesion	Biological process	10	136	493	14742	2.19872	0.0159733	0.324182	1.79661	TSC1//CCR7//UTRN//PLEKHA2//PDPK1//VTN//PLAU//SERPINE1//EDA//ITGB2
GO:0043543	protein acylation	Biological process	10	136	493	14742	2.19872	0.0159733	0.324182	1.79661	ING5//SRCAP//MBD3//TAF1L//GATA2//EID1//TCF3//PHF16//APBB1//PHF20
GO:0030334	regulation of cell migration	Biological process	19	332	493	14742	1.7113	0.016336	0.329972	1.78685	ADORA1//F2RL1//ANXA3//BMP4//PRKD2//PLCG1//TGFB2//PLAU//VTN//SERPINE1//MYLK//SPHK1//WNT5B//ABR//TPM1//CCR7//CCL19//STK10//LAMA4
GO:0033554	cellular response to stress	Biological process	49	1075	493	14742	1.363	0.016456	0.33008	1.78368	BECN1//ATG16L1//RPA4//ZFYVE26//EYA4//NUDT1//MUTYH//OGG1//POLR2D//USP1//RECQL5//BCCIP//C17ORF70//C1ORF124//HUWE1//RAD21//DCLRE1C//APBB1//TLK2//BRSK1//WFS1//ADORA2B//MAPK8//CCL19//BIRC7//MAX//RXRA//RTN4RL2//NEK6//ACD//MID1//TGFB2//ETV5//STX3//TPM1//NUAK2//GPX1//GRB2//BBC3//ARNT//F2RL1//CCR7//SDCBP//STC2//CAPN3//MYLK//MME//BAX//NSMCE4A
GO:2000147	positive regulation of cell motility	Biological process	13	199	493	14742	1.95344	0.0164963	0.33008	1.78261	F2RL1//ANXA3//BMP4//PRKD2//PLCG1//TGFB2//VTN//MYLK//SPHK1//WNT5B//CCR7//CCL19//SERPINE1
GO:0010811	positive regulation of cell-substrate adhesion	Biological process	5	45	493	14742	3.32252	0.0166584	0.330225	1.77837	CCR7//UTRN//PLEKHA2//TSC1//VTN
GO:0009306	protein secretion	Biological process	10	137	493	14742	2.18267	0.016736	0.330225	1.77635	F2RL1//CCR7//ACHE//TGFB2//SYTL4//PANX1//CCL19//NLRP1//RBP4//GNPTAB
GO:0018205	peptidyl-lysine modification	Biological process	10	137	493	14742	2.18267	0.016736	0.330225	1.77635	SRCAP//MBD3//TAF1L//GATA2//EID1//TCF3//PHF16//ING5//APBB1//PHF20
GO:0006468	protein phosphorylation	Biological process	50	1106	493	14742	1.35184	0.0177673	0.344592	1.75038	CDC25C//BCCIP//ADORA1//BMP4//ADORA2B//CRYAA//DAB2//FGF13//EREG//PDPK1//WFS1//NRG1//CHRM1//SPHK1//CCL19//BIRC7//MAPK8//STK4//NEK6//PRKD2//DYRK1A//EFEMP1//TGFB2//IL11//CAPRIN2//PRKCB//HNF4A//STK38//SPRY4//TSC1//CCR7//CAMK2D//STK10//ITGB2//VTN//TNK2//RUNX3//FYN//MYLK//POLR2D//PPP3CB//PRKY//TEC//ZAP70//TLK2//STK36//WNK4//ADM2//NUAK2//BRSK1
GO:0001913	T cell mediated cytotoxicity	Biological process	3	17	493	14742	5.27694	0.0178241	0.344592	1.74899	IL7R//PPP3CB//TAP1
GO:0042119	neutrophil activation	Biological process	3	17	493	14742	5.27694	0.0178241	0.344592	1.74899	ANXA3//ABR//F2RL1
GO:2000273	positive regulation of receptor activity	Biological process	3	17	493	14742	5.27694	0.0178241	0.344592	1.74899	ADORA1//EREG//SHANK3
GO:0006928	cellular component movement	Biological process	47	1029	493	14742	1.36582	0.0180134	0.344592	1.74441	AXL//SPOCK1//MDGA1//CCR7//CCL19//ADORA1//F2RL1//SDCBP//KIF5B//TUBB2A//KLC2//DST//TGFB2//WAS//MYH14//ANXA3//BMP4//PRKD2//PLCG1//PLAU//VTN//SERPINE1//FN1//PLXNB1//PSG2//MYO18A//MYL2//TPM1//TPM4//TCAP//SORD//TNP2//LAMA4//MYLK//SPHK1//WNT5B//ABR//ITGB2//FYN//GRB2//OLR1//PROS1//PPIL2//RAB6A//ZAP70//STK10//PALM
GO:0051276	chromosome organization	Biological process	33	673	493	14742	1.46625	0.0180545	0.344592	1.74341	DCLRE1C//ACD//TLK2//HIST1H2BD//HIST1H2BB//H3F3B//HIST1H2BL//HIST1H2BC//HIST1H2BO//HIST2H2BE//HIST1H3F//HIST1H2AG//HIST2H3D//HIST2H2AA4//NPM2//MBD3//CHMP1A//NCAPG//APBB1//EYA4//PRKCB//SRCAP//SS18L1//ING5//TAF1L//HUWE1//H1FNT//MAPK8//GATA2//EID1//TCF3//PHF16//PHF20
GO:0009790	embryo development	Biological process	38	799	493	14742	1.42215	0.0181863	0.344592	1.74026	DAB2//KEAP1//MBD3//ETNK2//TLX2//TCAP//STK4//TSC1//ARNT//GATA2//SIM2//HNF4A//DLX6//FBN2//PBX2//CYP26B1//ACD//CEP290//EN1//CRABP2//FLT3LG//SH2B3//WNT5B//ABR//LAMA4//BMP4//HOXC4//RBP4//RARB//TGFB2//CRYAA//HOXC6//GRB2//FOXL1//NRG1//HMGCL//FZD4//NPM2
GO:0006721	terpenoid metabolic process	Biological process	5	46	493	14742	3.25029	0.0181917	0.344592	1.74013	CYP26B1//CYP26C1//RBP4//RETSAT//CRABP2
GO:0050773	regulation of dendrite development	Biological process	5	46	493	14742	3.25029	0.0181917	0.344592	1.74013	ACHE//TLX2//PTPRF//CAPRIN2//PALM
GO:0030098	lymphocyte differentiation	Biological process	13	202	493	14742	1.92443	0.0184422	0.34779	1.73419	AXL//TCF3//IL11//DCLRE1C//IL7R//PPP3CB//ZAP70//PATZ1//FLT3LG//BMP4//CCR7//INHA//CCL19
GO:0030097	hemopoiesis	Biological process	24	455	493	14742	1.57728	0.0189054	0.35028	1.72341	AXL//TCF3//BMP4//FLT3LG//RUNX1//IL11//DCLRE1C//IL7R//PPP3CB//ZAP70//PATZ1//ALAS2//INHA//TRIM10//SH2B3//GATA2//MB//CCR7//CCL19//ARNT//STK4//F2RL1//TGFB2//CD164
GO:0006464	protein modification process	Biological process	93	2267	493	14742	1.22671	0.0189378	0.35028	1.72267	CDC25C//BCCIP//ADORA1//BMP4//ADORA2B//BTRC//HUWE1//PPIL2//TRIP12//HERC4//SMURF2//CRYAA//DAB2//FGF13//EREG//UBE2L6//TNK2//BIRC7//CAMK2D//RUNX3//DYRK1A//FYN//MYLK//PDPK1//POLR2D//PPP3CB//PRKCB//PRKY//STK4//STK10//TEC//TGFB2//ZAP70//NEK6//TLK2//STK38//PRKD2//STK36//WNK4//ADM2//NUAK2//BRSK1//PPM1B//PTPRD//MTMR4//ILKAP//ING5//B3GALT4//ALG1//B4GALNT2//ALG8//GFPT2//ALG9//GCNT3//WFS1//NRG1//CHRM1//SPHK1/…
GO:0001910	regulation of leukocyte mediated cytotoxicity	Biological process	4	31	493	14742	3.8584	0.0190171	0.35028	1.72085	IL7R//PPP3CB//TAP1//F2RL1
GO:0006942	regulation of striated muscle contraction	Biological process	4	31	493	14742	3.8584	0.0190171	0.35028	1.72085	CAMK2D//ADORA1//MYL2//SRI
GO:0055017	cardiac muscle tissue growth	Biological process	4	31	493	14742	3.8584	0.0190171	0.35028	1.72085	RXRA//TGFB2//RBP4//NRG1
GO:0051179	localization	Biological process	159	4126	493	14742	1.15233	0.0191261	0.35028	1.71837	RAB6A//SLC1A3//AXL//SPOCK1//MDGA1//BBC3//F2RL1//CCR7//CCL19//CALU//FN1//SERPINE1//PROS1//TGFB2//ADORA1//KEAP1//GSN//CHMP1A//AP3M1//TRAPPC5//ING1//PALM//CBY1//WNK4//AGXT//RAE1//RNPS1//TSC1//XPO6//SDCBP//TIMM17B//CLCN2//CLCN5//GRIA4//HDLBP//MB//ABCB1//ABCB4//CLIP1//SDHC//SLC5A5//SLC12A3//SRI//PEA15//CACNG2//CROT//CYB561D1//ATP6V1G2//ITPR1//KCNJ1//MFI2//KCNAB1//KCNH5//CACNG6//PKD1L2//KCNU1//CHRNB1//…
GO:0009888	tissue development	Biological process	50	1111	493	14742	1.34575	0.0191495	0.35028	1.71784	UNCX//STK4//BMP4//PSPN//TLX2//TGFB2//TSC1//WNT5B//EDA//HES7//CACNG2//CRABP2//KRT34//SPRR2F//WAS//RBM24//NRG1//CYP26C1//CAPN3//EREG//TUFT1//PHOSPHO1//FBN2//ECM1//DLX6//LCE1A//EFEMP1//BTRC//GPX1//GSN//SERPINE1//PLAU//KEAP1//GHSR//STC2//RBP4//TCAP//FOXL1//HOXC4//MYL2//CBY1//RXRA//TPM1//MYLK//GRB2//ETV5//F2RL1//PRKD2//MBD3
GO:0002698	negative regulation of immune effector process	Biological process	5	47	493	14742	3.18113	0.0198153	0.354078	1.703	IL7R//PPP3CB//TGFB2//TAP1//ABR
GO:0051209	release of sequestered calcium ion into cytosol	Biological process	5	47	493	14742	3.18113	0.0198153	0.354078	1.703	CAMK2D//CAPN3//CCR7//CCL19//BBC3
GO:0051282	regulation of sequestering of calcium ion	Biological process	5	47	493	14742	3.18113	0.0198153	0.354078	1.703	CAMK2D//CCR7//CCL19//BBC3//CAPN3
GO:0051283	negative regulation of sequestering of calcium ion	Biological process	5	47	493	14742	3.18113	0.0198153	0.354078	1.703	CAMK2D//CCR7//CCL19//BBC3//CAPN3
GO:0001775	cell activation	Biological process	34	703	493	14742	1.44622	0.019851	0.354078	1.70222	CCR7//CCL19//AXL//TCF3//F2RL1//TEC//CAPN3//FLT3LG//CALU//FN1//FYN//GP1BA//GRB2//IL11//ITPR1//SERPINE1//PDPK1//PRKCB//PROS1//RAC2//RAP1B//TGFB2//RASGRP2//DCLRE1C//IL7R//PPP3CB//ZAP70//PATZ1//BMP4//WAS//ADORA2B//ANXA3//ABR//INHA
GO:0055002	striated muscle cell development	Biological process	8	101	493	14742	2.36853	0.0198556	0.354078	1.70212	CACNG2//RBM24//CAPN3//TCAP//TPM1//BMP4//CHRNB1//MYL2
GO:0006816	calcium ion transport	Biological process	14	226	493	14742	1.85238	0.019954	0.35435	1.69997	CAMK2D//CCR7//CCL19//BBC3//CAPN3//CACNG2//CACNG6//MYLK//WFS1//ITPR1//PANX1//ANXA6//FYN//SRI
GO:0050851	antigen receptor-mediated signaling pathway	Biological process	9	121	493	14742	2.22416	0.0202472	0.357739	1.69363	FYN//PDPK1//PLCG1//WAS//ZAP70//PRKD2//CCR7//PRKCB//TEC
GO:0031668	cellular response to extracellular stimulus	Biological process	11	162	493	14742	2.03043	0.0203128	0.357739	1.69223	BECN1//ATG16L1//MAX//NUAK2//NUDT1//CHMP1A//FZD4//CYP26B1//WNT5B//ADORA2B//AXL
GO:0080134	regulation of response to stress	Biological process	31	630	493	14742	1.4714	0.0205914	0.361155	1.68631	MAPK8//KLKB1//ADORA1//ADORA2B//CCR7//USP1//CCL19//BIRC7//TEC//CAPN3//BECN1//F2RL1//GP1BA//SERPINE1//VTN//MID1//TGFB2//TAP1//ANXA2//PLAU//EREG//SDCBP//FYN//NLRP1//ABR//GHSR//MYLK//BAX//NEK6//SHANK3//NSMCE4A
GO:0032731	positive regulation of interleukin-1 beta production	Biological process	3	18	493	14742	4.98377	0.0208684	0.364513	1.68051	CCL19//NLRP1//PANX1
GO:0006488	dolichol-linked oligosaccharide biosynthetic process	Biological process	4	32	493	14742	3.73783	0.0211752	0.368363	1.67417	GFPT2//ALG1//ALG8//ALG9
GO:0040017	positive regulation of locomotion	Biological process	13	206	493	14742	1.88706	0.0213001	0.369029	1.67162	F2RL1//ANXA3//BMP4//PRKD2//PLCG1//TGFB2//VTN//MYLK//SPHK1//WNT5B//CCL19//CCR7//SERPINE1
GO:0070887	cellular response to chemical stimulus	Biological process	61	1410	493	14742	1.29366	0.0215957	0.372634	1.66563	PTPRF//CCR7//CCL19//F2RL1//HNF4A//NNMT//PTGS1//SULT1A1//CYP26B1//CYP26C1//WFS1//ATP6V1G2//GRB2//PDPK1//TSC1//ITPR1//PLCG1//GHSR//SPHK1//CAMK2D//EREG//IFI6//HLA-F//MX2//PPM1B//RAE1//UBE2L6//COL4A6//ITGB2//TGFB2//FZD4//ARNT//PRKCB//VTN//PRKD2//RXRA//ACSL5//CGA//TNFRSF25//ETV5//STX3//TPM1//PPP3CB//GPX1//BMP4//CHMP1A//ANXA2//PLA2G4F//GSN//CAPN3//WNT5B//P2RY11//SLC5A5//MME//GBP5//MAX//BTRC//STC2//BBC3…
GO:0060627	regulation of vesicle-mediated transport	Biological process	12	185	493	14742	1.93963	0.0217865	0.374412	1.66181	SYT1//LGI3//ANXA2//ADORA2B//F2RL1//ABR//CCL19//SYTL4//SERPINE1//VTN//GATA2//TNK2
GO:0051272	positive regulation of cellular component movement	Biological process	13	207	493	14742	1.87794	0.0220637	0.376166	1.65632	F2RL1//ANXA3//BMP4//PRKD2//PLCG1//TGFB2//VTN//MYLK//SPHK1//WNT5B//CCR7//CCL19//SERPINE1
GO:0001890	placenta development	Biological process	8	103	493	14742	2.32253	0.0220651	0.376166	1.65629	ARNT//GATA2//GHSR//STC2//GRB2//STK4//RXRA//ETNK2
GO:0040011	locomotion	Biological process	50	1123	493	14742	1.33137	0.0228244	0.387559	1.6416	AXL//SPOCK1//MDGA1//CCR7//CCL19//ADORA1//F2RL1//SDCBP//PLAU//CCRL2//CLTA//COL9A2//FYN//GRB2//PLCG1//PLXNB1//PSPN//RAC2//KLF7//FARP2//MYL9//MYH14//SEMA6D//LHX4//TGFB2//ANXA3//BMP4//PRKD2//VTN//SERPINE1//FN1//PSG2//MYO18A//SORD//TNP2//LAMA4//MYLK//SPHK1//WNT5B//ABR//TPM1//ITGB2//FZD4//CHRM1//DST//OLR1//PROS1//PPIL2//ZAP70//STK10
GO:0060415	muscle tissue morphogenesis	Biological process	5	49	493	14742	3.05129	0.0233406	0.393738	1.63189	TCAP//MYL2//RXRA//TPM1//MYLK
GO:0030239	myofibril assembly	Biological process	4	33	493	14742	3.62456	0.0234774	0.393738	1.62935	TCAP//CAPN3//TPM1//MYL2
GO:0048814	regulation of dendrite morphogenesis	Biological process	4	33	493	14742	3.62456	0.0234774	0.393738	1.62935	TLX2//PTPRF//CAPRIN2//ACHE
GO:0034101	erythrocyte homeostasis	Biological process	7	85	493	14742	2.46257	0.0235578	0.393738	1.62787	ALAS2//INHA//TRIM10//MB//ARNT//GATA2//AXL
GO:0010623	developmental programmed cell death	Biological process	3	19	493	14742	4.72147	0.0241793	0.400981	1.61656	CASP6//BAX//CRYAA
GO:0042573	retinoic acid metabolic process	Biological process	3	19	493	14742	4.72147	0.0241793	0.400981	1.61656	CYP26B1//CYP26C1//CRABP2
GO:0048870	cell motility	Biological process	37	791	493	14742	1.39873	0.0245832	0.404532	1.60936	AXL//SPOCK1//MDGA1//CCR7//CCL19//ADORA1//F2RL1//SDCBP//TGFB2//ANXA3//BMP4//PRKD2//PLCG1//PLAU//VTN//SERPINE1//FN1//PLXNB1//PSG2//MYO18A//SORD//TNP2//LAMA4//MYLK//SPHK1//WNT5B//ABR//TPM1//ITGB2//FYN//GRB2//OLR1//PROS1//PPIL2//ZAP70//STK10//DST
GO:0051674	localization of cell	Biological process	37	791	493	14742	1.39873	0.0245832	0.404532	1.60936	AXL//SPOCK1//MDGA1//CCR7//CCL19//ADORA1//F2RL1//SDCBP//TGFB2//ANXA3//BMP4//PRKD2//PLCG1//PLAU//VTN//SERPINE1//FN1//PLXNB1//PSG2//MYO18A//SORD//TNP2//LAMA4//MYLK//SPHK1//WNT5B//ABR//TPM1//ITGB2//DST//FYN//GRB2//OLR1//PROS1//PPIL2//ZAP70//STK10
GO:0033043	regulation of organelle organization	Biological process	22	419	493	14742	1.57007	0.0250284	0.410273	1.60157	TLK2//GSN//MAPT//MID1//CDC25C//NEK6//F2RL1//CCR7//MAPK8//DST//CLIP1//ANXA2//ACD//TSC1//GATA2//EID1//BMP4//EREG//PLXNB1//TPM1//BAX//BBC3
GO:0051208	sequestering of calcium ion	Biological process	5	50	493	14742	2.99026	0.0252455	0.412247	1.59782	CCR7//CCL19//BBC3
GO:0046883	regulation of hormone secretion	Biological process	11	168	493	14742	1.95791	0.0257463	0.417891	1.58929	HNF4A//ITPR1//PPP3CB//RAP1B//INHA//GIPR//RBP4//GHSR//SYTL4//ADORA1//IL11
GO:0002683	negative regulation of immune system process	Biological process	10	147	493	14742	2.03419	0.0259099	0.417891	1.58653	IL7R//PPP3CB//ADORA1//TGFB2//BMP4//F2RL1//TAP1//ABR//INHA//AXL
GO:0007159	leukocyte cell-cell adhesion	Biological process	4	34	493	14742	3.51796	0.0259256	0.417891	1.58627	ZAP70//STK10//ITGB2//OLR1
GO:0001944	vasculature development	Biological process	24	469	493	14742	1.5302	0.0259834	0.417891	1.5853	ANXA2//EREG//FN1//SERPINE1//PLAU//TGFB2//ADM2//WNT5B//LAMA4//FZD4//STK4//CCBE1//BMP4//ADORA2B//ANXA3//RUNX1//ECM1//GATA2//PLCG1//PRKCB//SPHK1//PRKD2//MYLK//MCAM
GO:2000145	regulation of cell motility	Biological process	19	350	493	14742	1.62329	0.026546	0.425335	1.576	ADORA1//F2RL1//ANXA3//BMP4//PRKD2//PLCG1//TGFB2//PLAU//VTN//SERPINE1//LAMA4//MYLK//SPHK1//WNT5B//ABR//TPM1//CCR7//CCL19//STK10
GO:0010647	positive regulation of cell communication	Biological process	32	669	493	14742	1.43032	0.0267868	0.426112	1.57208	ADORA1//EREG//BMP4//F2RL1//PLXNB1//TGFB2//BECN1//CCR7//PRKD2//ARNT//PRKCB//VTN//MID1//ECM1//EDA//CCL19//CFLAR//TRAF3IP2//NEK6//IL11//GHSR//STK36//SDCBP//SLC1A3//RASD2//GRIA4//SHANK3//LMCD1//CAPRIN2//BAX//DAB2//BBC3
GO:0048583	regulation of response to stimulus	Biological process	85	2080	493	14742	1.22198	0.0269121	0.426112	1.57005	ADORA2B//IL7R//PPP3CB//TAP1//PTPRF//GIPR//MAPK8//KLKB1//ADORA1//F2RL1//CCR7//EREG//USP1//CCL19//BIRC7//GPSM3//SPRY4//SERPINE1//PLAU//TEC//SPHK1//BMP4//TGFB2//PLXNB1//CAPN3//BECN1//SMURF2//FYN//PDPK1//PLCG1//WAS//ZAP70//PRKD2//FOXL1//CBY1//GP1BA//VTN//FZD4//ARNT//PRKCB//TSC1//GHSR//RAPGEF2//MID1//ABR//FARP2//FGD3//FBN2//CLTA//GRB2//HNF4A//ANXA2//BTRC//ECM1//EDA//CFLAR//TRAF3IP2//NEK6//STK38//IL11/…
GO:0003015	heart process	Biological process	8	107	493	14742	2.23571	0.0269944	0.426112	1.56873	TPM1//CAMK2D//SRI//ADORA1//TGFB2//GPX1//MYL2//TCAP
GO:0060047	heart contraction	Biological process	8	107	493	14742	2.23571	0.0269944	0.426112	1.56873	TPM1//CAMK2D//SRI//ADORA1//TGFB2//TCAP//GPX1//MYL2
GO:0009966	regulation of signal transduction	Biological process	66	1563	493	14742	1.26268	0.0272905	0.427591	1.56399	ADORA2B//PTPRF//GIPR//ADORA1//EREG//CCL19//BIRC7//GPSM3//SERPINE1//PLAU//SPHK1//F2RL1//BMP4//PLXNB1//TGFB2//SMURF2//CCR7//PRKD2//FOXL1//CBY1//PDPK1//FZD4//ARNT//PRKCB//VTN//TSC1//RAPGEF2//MID1//ABR//FARP2//FGD3//FBN2//CLTA//GRB2//HNF4A//CAPN3//BTRC//ECM1//EDA//CFLAR//TRAF3IP2//NEK6//STK38//SPRY4//IL11//GHSR//RASD2//GATA2//STK36//SDCBP//CYP26B1//CYP26C1//RAC2//RASGRP2//ARHGAP30//PALM//LMCD1//DAB2/…
GO:0052547	regulation of peptidase activity	Biological process	14	236	493	14742	1.77389	0.0276532	0.427591	1.55825	BAX//NLRP1//BBC3//ECM1//GPX1//SERPINE1//PROS1//RENBP//SPINK1//SPOCK1//VTN//CRYAA//IFI6//CFLAR
GO:0002446	neutrophil mediated immunity	Biological process	3	20	493	14742	4.4854	0.0277565	0.427591	1.55663	ANXA3//ABR//F2RL1
GO:0007090	regulation of S phase of mitotic cell cycle	Biological process	3	20	493	14742	4.4854	0.0277565	0.427591	1.55663	APBB1//CHMP1A//ILKAP
GO:0035162	embryonic hemopoiesis	Biological process	3	20	493	14742	4.4854	0.0277565	0.427591	1.55663	STK4//FLT3LG//SH2B3
GO:0043300	regulation of leukocyte degranulation	Biological process	3	20	493	14742	4.4854	0.0277565	0.427591	1.55663	ADORA2B//F2RL1//ABR
GO:0048736	appendage development	Biological process	9	128	493	14742	2.10253	0.0279309	0.427591	1.55391	DLX6//FBN2//PBX2//CYP26B1//ACD//CRABP2//EN1//FOXL1//BMP4
GO:0060173	limb development	Biological process	9	128	493	14742	2.10253	0.0279309	0.427591	1.55391	DLX6//FBN2//PBX2//CYP26B1//ACD//CRABP2//EN1//FOXL1//BMP4
GO:0031344	regulation of cell projection organization	Biological process	13	214	493	14742	1.81652	0.027991	0.427591	1.55298	SPOCK1//CCR7//F2RL1//PTPRF//HNF4A//MAPT//ACHE//PLXNB1//AMIGO1//TLX2//CAPRIN2//PALM//CCL19
GO:0051051	negative regulation of transport	Biological process	14	237	493	14742	1.7664	0.0285289	0.431385	1.54472	ADORA1//KEAP1//PTGS1//PRKCB//INHA//CRYAA//HNF4A//ABR//PEA15//GHSR//SYTL4//IL11//NRG1//F2RL1
GO:0016049	cell growth	Biological process	19	353	493	14742	1.60949	0.028636	0.431385	1.54309	CAMK2D//SPOCK1//RASGRP2//FAM107A//CRYAA//NRG1//TGFB2//SPHK1//APBB1//DAB2//HNF4A//ING1//MYL2//RRAD//NDRG3//CAPRIN2//MAPT//PPP3CB//IL7R
GO:0003001	generation of a signal involved in cell-cell signaling	Biological process	17	306	493	14742	1.66126	0.0286443	0.431385	1.54296	SYT1//ALDH5A1//BRSK1//HNF4A//ITPR1//PPP3CB//RAP1B//ADORA1//INHA//VGF//GHSR//GIPR//RBP4//CGA//FZD4//SYTL4//IL11
GO:0023061	signal release	Biological process	17	306	493	14742	1.66126	0.0286443	0.431385	1.54296	SYT1//ALDH5A1//BRSK1//HNF4A//ITPR1//PPP3CB//RAP1B//ADORA1//INHA//VGF//GHSR//GIPR//RBP4//CGA//FZD4//SYTL4//IL11
GO:0035265	organ growth	Biological process	6	70	493	14742	2.56308	0.0293643	0.440672	1.53218	CGA//STK4//RXRA//TGFB2//RBP4//NRG1
GO:0019932	second-messenger-mediated signaling	Biological process	16	284	493	14742	1.68466	0.0296221	0.442969	1.52838	HTR1D//GALR2//ADORA2B//GIPR//ADM2//ADORA1//P2RY11//CHRM1//SPHK1//NUDT4//MCTP2//CAMK2D//RAPGEF2//ITPR1//RASD2//LMCD1
GO:0031346	positive regulation of cell projection organization	Biological process	8	109	493	14742	2.19469	0.0297253	0.442969	1.52687	CCR7//F2RL1//MAPT//PLXNB1//AMIGO1//PTPRF//CAPRIN2//PALM
GO:0040012	regulation of locomotion	Biological process	20	379	493	14742	1.57798	0.0302018	0.448502	1.51997	ADORA1//F2RL1//ANXA3//BMP4//PRKD2//PLCG1//TGFB2//PLAU//VTN//SERPINE1//LAMA4//MYLK//SPHK1//WNT5B//ABR//TPM1//CCL19//CCR7//STK10//CHRM1
GO:0030308	negative regulation of cell growth	Biological process	9	130	493	14742	2.07018	0.0304584	0.450742	1.51629	APBB1//DAB2//HNF4A//ING1//MYL2//RRAD//TGFB2//NDRG3//CAPRIN2
GO:0010970	microtubule-based transport	Biological process	4	36	493	14742	3.32252	0.0312663	0.454983	1.50492	KLC2//DST//KIF5B//RAB6A
GO:0031341	regulation of cell killing	Biological process	4	36	493	14742	3.32252	0.0312663	0.454983	1.50492	IL7R//PPP3CB//TAP1//F2RL1
GO:0043299	leukocyte degranulation	Biological process	4	36	493	14742	3.32252	0.0312663	0.454983	1.50492	ADORA2B//F2RL1//ANXA3//ABR
GO:0060048	cardiac muscle contraction	Biological process	4	36	493	14742	3.32252	0.0312663	0.454983	1.50492	CAMK2D//ADORA1//TPM1//TCAP
GO:0002886	regulation of myeloid leukocyte mediated immunity	Biological process	3	21	493	14742	4.27181	0.031599	0.454983	1.50033	ADORA2B//F2RL1//ABR
GO:0032732	positive regulation of interleukin-1 production	Biological process	3	21	493	14742	4.27181	0.031599	0.454983	1.50033	PANX1//CCL19//NLRP1
GO:0042346	positive regulation of NF-kappaB import into nucleus	Biological process	3	21	493	14742	4.27181	0.031599	0.454983	1.50033	EDA//CCL19//SPHK1
GO:0045214	sarcomere organization	Biological process	3	21	493	14742	4.27181	0.031599	0.454983	1.50033	CAPN3//TPM1//TCAP
GO:0002429	immune response-activating cell surface receptor signaling pathway	Biological process	9	131	493	14742	2.05438	0.0317802	0.456051	1.49784	FYN//PDPK1//PLCG1//WAS//ZAP70//PRKD2//CCR7//PRKCB//TEC
GO:0010927	cellular component assembly involved in morphogenesis	Biological process	8	111	493	14742	2.15515	0.0326405	0.466826	1.48624	CAPN3//TCAP//CBY1//STK36//CEP290//TTC8//TPM1//MYL2
GO:0002685	regulation of leukocyte migration	Biological process	6	72	493	14742	2.49189	0.0331198	0.470522	1.47991	ADORA1//F2RL1//CCR7//CCL19//SERPINE1//STK10
GO:0017157	regulation of exocytosis	Biological process	6	72	493	14742	2.49189	0.0331198	0.470522	1.47991	SYT1//ADORA2B//F2RL1//ABR//SYTL4//LGI3
GO:0006916	anti-apoptosis	Biological process	15	265	493	14742	1.6926	0.0332566	0.470896	1.47812	BAX//RTKN//CRYAA//IFI6//GPX1//NRG1//BECN1//PEA15//CFLAR//SPHK1//TIAF1//BIRC7//LHX4//AMIGO2//MYO18A
GO:0030010	establishment of cell polarity	Biological process	5	54	493	14742	2.76876	0.0338467	0.477665	1.47048	CCR7//CCL19//RAP1B//RAB11FIP2//BRSK1
GO:0060419	heart growth	Biological process	4	37	493	14742	3.23272	0.0341611	0.478048	1.46647	RXRA//TGFB2//RBP4//NRG1
GO:0070227	lymphocyte apoptosis	Biological process	4	37	493	14742	3.23272	0.0341611	0.478048	1.46647	BAX//BMP4//BBC3//BIRC7
GO:0016477	cell migration	Biological process	34	734	493	14742	1.38514	0.0342104	0.478048	1.46584	AXL//SPOCK1//MDGA1//CCR7//CCL19//ADORA1//F2RL1//SDCBP//TGFB2//ANXA3//BMP4//PRKD2//PLCG1//PLAU//VTN//SERPINE1//LAMA4//MYLK//SPHK1//WNT5B//ABR//TPM1//ITGB2//FN1//FYN//GRB2//OLR1//PROS1//PPIL2//ZAP70//STK10//PLXNB1//PSG2//MYO18A
GO:0009991	response to extracellular stimulus	Biological process	19	361	493	14742	1.57382	0.0348139	0.481458	1.45825	BECN1//ATG16L1//GIPR//HMGCL//RXRA//STC2//ACSL5//MAX//ADORA2B//AXL//GHSR//RBP4//NUAK2//NUDT1//CHMP1A//GSN//FZD4//CYP26B1//WNT5B
GO:0050896	response to stimulus	Biological process	244	6691	493	14742	1.09046	0.0348377	0.481458	1.45795	BECN1//ATG16L1//RPA4//FGF13//RAPGEF2//ADORA2B//SERPINE1//ZFYVE26//ADORA1//ALAS2//ARNT//CRYAA//ITPR1//MB//PLAU//TGFB2//IL7R//PPP3CB//TAP1//PTPRF//VGF//GIPR//MAPK8//ZAP70//F2RL1//CCR7//CCL19//CASP6//KLKB1//BMP4//CREB3L1//MX2//P2RY11//WAS//HCP5//FN1//ANXA3//PRG2//HIST1H2BC//HIST2H2BE//NLRP1//CALU//FYN//GATA2//GP1BA//GRB2//H3F3B//HNF4A//ITGB2//OLR1//PDPK1//PLCG1//PRKCB//PROS1//RAC2//RAP1B//HIST1H3F//…
GO:0008015	blood circulation	Biological process	16	290	493	14742	1.6498	0.0349043	0.481458	1.45712	F2RL1//TPM1//ADORA1//CAMK2D//SRI//PTGS1//RENBP//ACSM3//TAC4//ADORA2B//ADM2//TGFB2//GPX1//MYL2//TCAP//OLR1
GO:0007154	cell communication	Biological process	169	4490	493	14742	1.12551	0.0349063	0.481458	1.4571	BECN1//ATG16L1//FGF13//RAPGEF2//ADORA2B//SLC1A3//ACHE//PTPRF//RASD2//GIPR//MAPK8//BMP4//TLE2//FZD4//BTRC//RNF138//WNT5B//ADORA1//APBB1//AXL//CAPN3//CD33//CGA//CHRM1//CHRNB1//CRABP2//ECM1//EDA//FLT3LG//IL7R//INHA//ITPR1//PLAU//PLCG1//PLXNB1//PPP2R2B//PPP3CB//PRKCB//RAC2//RAP1B//RARB//RRAD//RTKN//SPOCK1//SRI//STK4//TNFRSF25//CD164//SPHK1//ZNF259//GDF15//RASGRP2//NEK6//GPR173//PLEKHB1//GPSM3//FIBCD1…
GO:0016925	protein sumoylation	Biological process	3	22	493	14742	4.07763	0.0357045	0.486174	1.44728	CAPN3//ARNT//RASD2
GO:0050766	positive regulation of phagocytosis	Biological process	3	22	493	14742	4.07763	0.0357045	0.486174	1.44728	F2RL1//ABR//GATA2
GO:0060986	endocrine hormone secretion	Biological process	3	22	493	14742	4.07763	0.0357045	0.486174	1.44728	INHA//CGA//FZD4
GO:2000107	negative regulation of leukocyte apoptosis	Biological process	3	22	493	14742	4.07763	0.0357045	0.486174	1.44728	BMP4//CCR7//CCL19
GO:0003013	circulatory system process	Biological process	16	291	493	14742	1.64413	0.0358475	0.486566	1.44554	F2RL1//TPM1//ADORA1//OLR1//CAMK2D//SRI//PTGS1//RENBP//ACSM3//TAC4//ADORA2B//ADM2//TGFB2//GPX1//MYL2//TCAP
GO:0006775	fat-soluble vitamin metabolic process	Biological process	5	55	493	14742	2.71842	0.0362482	0.488892	1.44071	CYP26B1//CYP26C1//RBP4//RETSAT//CRABP2
GO:0048644	muscle organ morphogenesis	Biological process	5	55	493	14742	2.71842	0.0362482	0.488892	1.44071	TCAP//MYL2//RXRA//TPM1//MYLK
GO:0048534	hemopoietic or lymphoid organ development	Biological process	24	486	493	14742	1.47667	0.037135	0.492272	1.43022	AXL//TCF3//BMP4//IL7R//RUNX1//TGFB2//CD164//FLT3LG//IL11//DCLRE1C//PPP3CB//ZAP70//PATZ1//ALAS2//INHA//TRIM10//SH2B3//GATA2//MB//CCR7//CCL19//ARNT//STK4//F2RL1
GO:0007162	negative regulation of cell adhesion	Biological process	6	74	493	14742	2.42454	0.0371735	0.492272	1.42977	SPOCK1//FZD4//B4GALNT2//SERPINE1//CD164//ADAM22
GO:0006637	acyl-CoA metabolic process	Biological process	4	38	493	14742	3.14765	0.0372066	0.492272	1.42938	ACSL5//HMGCL//HNF4A//ACOT8
GO:0031110	regulation of microtubule polymerization or depolymerization	Biological process	4	38	493	14742	3.14765	0.0372066	0.492272	1.42938	MAPT//MID1//CLIP1//DST
GO:0035383	thioester metabolic process	Biological process	4	38	493	14742	3.14765	0.0372066	0.492272	1.42938	HMGCL//HNF4A//ACOT8//ACSL5
GO:0008360	regulation of cell shape	Biological process	7	94	493	14742	2.22679	0.037974	0.492272	1.42051	FN1//ITGB2//PALM//PLXNB1//FERMT2//MYH14//FGD3
GO:0006917	induction of apoptosis	Biological process	20	389	493	14742	1.53741	0.0380759	0.492272	1.41935	BBC3//IL7R//PPP3CB//TAP1//ABR//ADORA1//BAX//MAPK8//TNFRSF25//CFLAR//FGD3//CASP4//CASP6//RUNX3//INHA//STK4//DPF1//SMNDC1//PHLDA1//NLRP1
GO:0043933	macromolecular complex subunit organization	Biological process	45	1028	493	14742	1.30897	0.038175	0.492272	1.41822	GEMIN4//PSIP1//HIST1H2BD//HIST1H2BB//H3F3B//HIST1H2BL//HIST1H2BC//HIST1H2BO//HIST2H2BE//HIST1H3F//HIST1H2AG//HIST2H3D//HIST2H2AA4//GSN//CAPN3//MAX//MITF//TCEB2//WAS//TCAP//MAGI1//CRYAA//MAPT//MID1//NRG1//GHSR//CLP1//F2RL1//CCR7//CLIP1//BAX//BBC3//PANX1//KIF5B//PEX14//SYT1//ATG16L1//LNX2//ACHE//TUBB2A//SHMT2//ALDH5A1//GRB2//TSC1//TRIM34
GO:0007517	muscle organ development	Biological process	16	294	493	14742	1.62735	0.0387884	0.492272	1.4113	CACNG2//RBM24//BMP4//TCAP//MYL2//RXRA//TPM1//RBP4//NRG1//MYLK//ACHE//CAPN3//SRI//TAGLN//UTRN//CD164
GO:0032101	regulation of response to external stimulus	Biological process	17	318	493	14742	1.59857	0.0391033	0.492272	1.40779	KLKB1//ADORA1//F2RL1//ADORA2B//CCR7//TEC//CAPN3//BECN1//GP1BA//SERPINE1//VTN//GHSR//ANXA2//PLAU//NLRP1//ABR//CCL19
GO:0034641	cellular nitrogen compound metabolic process	Biological process	199	5381	493	14742	1.10586	0.0394297	0.492272	1.40418	IL7R//ACHE//CDC25C//DBF4//GINS3//ING5//BMP4//RUNX3//GATA2//RXRA//SIM2//ZMYND8//EID1//LMCD1//MBD3//HIST2H3D//UBTF//RNPS1//PAN3//MPHOSPH10//SMNDC1//GEMIN4//PSIP1//GTF2F2//POLR2D//CLP1//DCLRE1C//ACD//ZFYVE26//TRUB2//RPUSD2//MAX//TCEB2//RDBP//POU6F2//LSM10//HIST1H2BD//HIST1H2BB//H3F3B//HIST1H2BL//HIST1H2BC//HIST1H2BO//HIST2H2BE//HIST1H3F//HIST1H2AG//HIST2H2AA4//B4GALNT2//GFPT2//GPX1//ALDH5A1//PRPSAP1…
GO:0007243	intracellular protein kinase cascade	Biological process	34	743	493	14742	1.36836	0.0395991	0.492272	1.40231	FGF13//RAPGEF2//TIAF1//ADORA2B//MAPK8//CCL19//BIRC7//MID1//TGFB2//EDA//SPHK1//HNF4A//CAPN3//F2RL1//PDPK1//BTRC//CCR7//ECM1//PRKCB//CFLAR//TRAF3IP2//NEK6//GRB2//IL11//AXL//SDCBP//RASD2//PRKD2//FYN//STK4//TEC//ZAP70//STK38//WNK4
GO:0015833	peptide transport	Biological process	11	180	493	14742	1.82738	0.0396419	0.492272	1.40185	ADORA1//HNF4A//ITPR1//PPP3CB//RAP1B//VGF//GHSR//GIPR//RBP4//SYTL4//TAP1
GO:0012502	induction of programmed cell death	Biological process	20	391	493	14742	1.52955	0.039817	0.492272	1.39993	BBC3//IL7R//PPP3CB//TAP1//BAX//CASP4//CASP6//RUNX3//INHA//STK4//DPF1//TNFRSF25//SMNDC1//PHLDA1//NLRP1//ABR//ADORA1//MAPK8//CFLAR//FGD3
GO:0009394	2'-deoxyribonucleotide metabolic process	Biological process	3	23	493	14742	3.90034	0.0400703	0.492272	1.39718	NUDT1//MUTYH//OGG1
GO:0030225	macrophage differentiation	Biological process	3	23	493	14742	3.90034	0.0400703	0.492272	1.39718	GATA2//INHA//BMP4
GO:0034446	substrate adhesion-dependent cell spreading	Biological process	3	23	493	14742	3.90034	0.0400703	0.492272	1.39718	AXL//FN1//FZD4
GO:0061098	positive regulation of protein tyrosine kinase activity	Biological process	3	23	493	14742	3.90034	0.0400703	0.492272	1.39718	ADORA1//EREG//NRG1
GO:0007409	axonogenesis	Biological process	24	490	493	14742	1.46462	0.0402135	0.492272	1.39563	CLTA//COL9A2//FYN//GRB2//PLCG1//PLXNB1//PSPN//RAC2//SDCBP//KLF7//FARP2//MYL9//MYH14//SEMA6D//AMIGO1//LHX4//RXRA//RTN4RL2//MAPT//PPP3CB//ACHE//APBB1//DST//BRSK1
GO:0001836	release of cytochrome c from mitochondria	Biological process	4	39	493	14742	3.06694	0.0404031	0.492272	1.39359	BAX//BBC3//IFI6//GPX1
GO:0010595	positive regulation of endothelial cell migration	Biological process	4	39	493	14742	3.06694	0.0404031	0.492272	1.39359	PLCG1//PRKD2//ANXA3//BMP4
GO:0030049	muscle filament sliding	Biological process	4	39	493	14742	3.06694	0.0404031	0.492272	1.39359	MYL2//TPM1//TPM4//TCAP
GO:0033275	actin-myosin filament sliding	Biological process	4	39	493	14742	3.06694	0.0404031	0.492272	1.39359	MYL2//TPM1//TPM4//TCAP
GO:0042246	tissue regeneration	Biological process	4	39	493	14742	3.06694	0.0404031	0.492272	1.39359	CAPN3//PLAU//GSN//SERPINE1
GO:0043525	positive regulation of neuron apoptosis	Biological process	4	39	493	14742	3.06694	0.0404031	0.492272	1.39359	BAX//CASP6//PTPRF//TGFB2
GO:0002791	regulation of peptide secretion	Biological process	9	137	493	14742	1.96441	0.0405529	0.492272	1.39198	ADORA1//HNF4A//ITPR1//PPP3CB//RAP1B//GIPR//RBP4//GHSR//SYTL4
GO:0090087	regulation of peptide transport	Biological process	9	137	493	14742	1.96441	0.0405529	0.492272	1.39198	ADORA1//HNF4A//ITPR1//PPP3CB//RAP1B//GIPR//RBP4//GHSR//SYTL4
GO:0035107	appendage morphogenesis	Biological process	8	116	493	14742	2.06225	0.0407656	0.492272	1.38971	DLX6//FBN2//PBX2//CYP26B1//ACD//CRABP2//EN1//FOXL1
GO:0035108	limb morphogenesis	Biological process	8	116	493	14742	2.06225	0.0407656	0.492272	1.38971	DLX6//FBN2//PBX2//CYP26B1//ACD//CRABP2//EN1//FOXL1
GO:0006793	phosphorus metabolic process	Biological process	61	1464	493	14742	1.24594	0.0416564	0.492272	1.38032	CDC25C//BCCIP//ADORA1//BMP4//ADORA2B//CRYAA//DAB2//FGF13//EREG//CAMK2D//RUNX3//DYRK1A//FYN//MYLK//PDPK1//POLR2D//PPP3CB//PRKCB//PRKY//STK4//STK10//TEC//TGFB2//ZAP70//NEK6//TLK2//STK38//PRKD2//STK36//WNK4//ADM2//NUAK2//BRSK1//PPM1B//PTPRD//BTRC//MTMR4//ILKAP//WFS1//NRG1//CHRM1//SPHK1//CCL19//BIRC7//MAPK8//KIAA0430//MPHOSPH10//TNK2//EFEMP1//IL11//CAPRIN2//PTPRF//INHA//SDCBP//HNF4A//SPRY4//CCR7//TSC…
GO:0006796	phosphate-containing compound metabolic process	Biological process	61	1464	493	14742	1.24594	0.0416564	0.492272	1.38032	CDC25C//BCCIP//ADORA1//BMP4//ADORA2B//CRYAA//DAB2//FGF13//EREG//CAMK2D//RUNX3//DYRK1A//FYN//MYLK//PDPK1//POLR2D//PPP3CB//PRKCB//PRKY//STK4//STK10//TEC//TGFB2//ZAP70//NEK6//TLK2//STK38//PRKD2//STK36//WNK4//ADM2//NUAK2//BRSK1//PPM1B//PTPRD//BTRC//MTMR4//ILKAP//WFS1//NRG1//CHRM1//SPHK1//CCL19//BIRC7//MAPK8//KIAA0430//MPHOSPH10//TNK2//EFEMP1//IL11//CAPRIN2//PTPRF//INHA//SDCBP//HNF4A//SPRY4//CCR7//TSC…
GO:0002521	leukocyte differentiation	Biological process	16	297	493	14742	1.61092	0.0418998	0.492272	1.37779	AXL//TCF3//FLT3LG//IL11//DCLRE1C//IL7R//PPP3CB//ZAP70//PATZ1//BMP4//RUNX1//GATA2//CCR7//INHA//CCL19//F2RL1
GO:0002710	negative regulation of T cell mediated immunity	Biological process	2	10	493	14742	5.98053	0.042043	0.492272	1.37631	IL7R//PPP3CB
GO:0010269	response to selenium ion	Biological process	2	10	493	14742	5.98053	0.042043	0.492272	1.37631	GPX1//RXRA
GO:0010560	positive regulation of glycoprotein biosynthetic process	Biological process	2	10	493	14742	5.98053	0.042043	0.492272	1.37631	CCR7//CCL19
GO:0010829	negative regulation of glucose transport	Biological process	2	10	493	14742	5.98053	0.042043	0.492272	1.37631	PEA15//PRKCB
GO:0014061	regulation of norepinephrine secretion	Biological process	2	10	493	14742	5.98053	0.042043	0.492272	1.37631	PTGS1//ADORA2B
GO:0031272	regulation of pseudopodium assembly	Biological process	2	10	493	14742	5.98053	0.042043	0.492272	1.37631	CCR7//F2RL1
GO:0032274	gonadotropin secretion	Biological process	2	10	493	14742	5.98053	0.042043	0.492272	1.37631	INHA//CGA
GO:0032469	endoplasmic reticulum calcium ion homeostasis	Biological process	2	10	493	14742	5.98053	0.042043	0.492272	1.37631	BBC3//WFS1
GO:0034695	response to prostaglandin E stimulus	Biological process	2	10	493	14742	5.98053	0.042043	0.492272	1.37631	CCR7//CCL19
GO:0043302	positive regulation of leukocyte degranulation	Biological process	2	10	493	14742	5.98053	0.042043	0.492272	1.37631	ADORA2B//F2RL1
GO:0045741	positive regulation of epidermal growth factor-activated receptor activity	Biological process	2	10	493	14742	5.98053	0.042043	0.492272	1.37631	ADORA1//EREG
GO:0051968	positive regulation of synaptic transmission, glutamatergic	Biological process	2	10	493	14742	5.98053	0.042043	0.492272	1.37631	GRIA4//SHANK3
GO:0060068	vagina development	Biological process	2	10	493	14742	5.98053	0.042043	0.492272	1.37631	AXL//RBP4
GO:0071470	cellular response to osmotic stress	Biological process	2	10	493	14742	5.98053	0.042043	0.492272	1.37631	CAPN3//MYLK
GO:0071731	response to nitric oxide	Biological process	2	10	493	14742	5.98053	0.042043	0.492272	1.37631	CCR7//CCL19
GO:0072531	pyrimidine-containing compound transmembrane transport	Biological process	2	10	493	14742	5.98053	0.042043	0.492272	1.37631	SLC35A2//SLC35B4
GO:0002768	immune response-regulating cell surface receptor signaling pathway	Biological process	9	138	493	14742	1.95017	0.0421595	0.492284	1.3751	FYN//PDPK1//PLCG1//WAS//ZAP70//PRKD2//CCR7//PRKCB//TEC
GO:0006766	vitamin metabolic process	Biological process	8	117	493	14742	2.04462	0.0425381	0.495349	1.37122	SLC2A3//PPCS//CYP26B1//CYP26C1//RBP4//RETSAT//CRABP2//RXRA
GO:0007010	cytoskeleton organization	Biological process	33	722	493	14742	1.36674	0.0427589	0.496563	1.36897	DST//MAPT//MID1//CLIP1//GSN//ABR//PDPK1//RAC2//SDCBP//FERMT2//NUAK2//FGD3//BAX//CRYAA//TUBGCP5//GHSR//WAS//CAPN3//TCAP//F2RL1//CCR7//EPB41L1//EPB41L3//MYO18A//TSC1//TPM1//NEK6//BRSK1//PLXNB1//MYL2//SYNE1//SHANK3//PALM
GO:0001676	long-chain fatty acid metabolic process	Biological process	4	40	493	14742	2.99026	0.0437508	0.503575	1.35901	ACOX1//PTGS1//PLP1//SLC27A2
GO:0033627	cell adhesion mediated by integrin	Biological process	4	40	493	14742	2.99026	0.0437508	0.503575	1.35901	PLAU//SERPINE1//TGFB2//VTN
GO:0070252	actin-mediated cell contraction	Biological process	4	40	493	14742	2.99026	0.0437508	0.503575	1.35901	MYL2//TPM1//TPM4//TCAP
GO:0050852	T cell receptor signaling pathway	Biological process	7	97	493	14742	2.15792	0.0438354	0.503575	1.35818	CCR7//PRKD2//FYN//PDPK1//PLCG1//WAS//ZAP70
GO:0052548	regulation of endopeptidase activity	Biological process	13	229	493	14742	1.69753	0.0444753	0.506596	1.35188	BAX//NLRP1//BBC3//GPX1//SERPINE1//PROS1//RENBP//SPINK1//SPOCK1//VTN//CRYAA//IFI6//CFLAR
GO:0007031	peroxisome organization	Biological process	3	24	493	14742	3.73783	0.0446926	0.506596	1.34976	AGXT//PEX14//ACOT8
GO:0007157	heterophilic cell-cell adhesion	Biological process	3	24	493	14742	3.73783	0.0446926	0.506596	1.34976	CD164//AMIGO1//AMIGO2
GO:0048260	positive regulation of receptor-mediated endocytosis	Biological process	3	24	493	14742	3.73783	0.0446926	0.506596	1.34976	SERPINE1//CCL19//VTN
GO:0050854	regulation of antigen receptor-mediated signaling pathway	Biological process	3	24	493	14742	3.73783	0.0446926	0.506596	1.34976	CCR7//PRKD2//PRKCB
GO:0010720	positive regulation of cell development	Biological process	9	140	493	14742	1.92231	0.0455	0.510497	1.34199	TGFB2//MAPT//SHANK3//PLXNB1//AMIGO1//PTPRF//CAPRIN2//BMP4//ETV5
GO:0051270	regulation of cellular component movement	Biological process	19	373	493	14742	1.52319	0.0458554	0.510497	1.33861	ADORA1//F2RL1//ANXA3//BMP4//PRKD2//PLCG1//TGFB2//PLAU//VTN//SERPINE1//LAMA4//MYLK//SPHK1//WNT5B//ABR//TPM1//CCR7//CCL19//STK10
GO:0030326	embryonic limb morphogenesis	Biological process	7	98	493	14742	2.1359	0.0459117	0.510497	1.33808	CRABP2//EN1//DLX6//FBN2//PBX2//CYP26B1//ACD
GO:0035113	embryonic appendage morphogenesis	Biological process	7	98	493	14742	2.1359	0.0459117	0.510497	1.33808	DLX6//FBN2//PBX2//CYP26B1//ACD//CRABP2//EN1
GO:0016310	phosphorylation	Biological process	53	1256	493	14742	1.26182	0.0459157	0.510497	1.33804	CDC25C//BCCIP//ADORA1//BMP4//ADORA2B//CRYAA//DAB2//FGF13//EREG//CAMK2D//RUNX3//DYRK1A//FYN//MYLK//PDPK1//POLR2D//PPP3CB//PRKCB//PRKY//STK4//STK10//TEC//TGFB2//ZAP70//NEK6//TLK2//STK38//PRKD2//STK36//WNK4//ADM2//NUAK2//BRSK1//WFS1//NRG1//CHRM1//SPHK1//CCL19//BIRC7//MAPK8//EFEMP1//IL11//CAPRIN2//INHA//SDCBP//HNF4A//SPRY4//CCR7//TSC1//GNPTAB//ITGB2//VTN//TNK2
GO:0023056	positive regulation of signaling	Biological process	31	675	493	14742	1.37331	0.046019	0.510497	1.33706	ADORA1//EREG//BMP4//F2RL1//PLXNB1//TGFB2//CCR7//PRKD2//ARNT//PRKCB//VTN//MID1//ECM1//EDA//CCL19//CFLAR//TRAF3IP2//NEK6//IL11//GHSR//STK36//SDCBP//SLC1A3//RASD2//GRIA4//SHANK3//LMCD1//CAPRIN2//BAX//DAB2//BBC3
GO:0048568	embryonic organ development	Biological process	15	277	493	14742	1.61928	0.0460382	0.510497	1.33688	ARNT//GATA2//TCAP//CEP290//FLT3LG//SH2B3//ABR//DLX6//HOXC4//RBP4//RARB//TGFB2//CRYAA//STK4//GRB2
GO:0019722	calcium-mediated signaling	Biological process	6	78	493	14742	2.3002	0.0461989	0.510497	1.33537	CAMK2D//LMCD1//P2RY11//SPHK1//NUDT4//MCTP2
GO:0030218	erythrocyte differentiation	Biological process	6	78	493	14742	2.3002	0.0461989	0.510497	1.33537	MB//ARNT//GATA2//ALAS2//INHA//TRIM10
GO:0055001	muscle cell development	Biological process	8	119	493	14742	2.01026	0.0462346	0.510497	1.33503	CACNG2//RBM24//CAPN3//TCAP//TPM1//BMP4//CHRNB1//MYL2
GO:0051259	protein oligomerization	Biological process	14	254	493	14742	1.64818	0.0466974	0.514274	1.33071	BAX//BBC3//PANX1//CRYAA//PEX14//SYT1//ATG16L1//LNX2//ACHE//SHMT2//ALDH5A1//GRB2//TSC1//TRIM34
GO:0043123	positive regulation of I-kappaB kinase/NF-kappaB cascade	Biological process	9	141	493	14742	1.90868	0.0472347	0.516354	1.32574	CCR7//ECM1//EDA//F2RL1//PRKCB//CCL19//CFLAR//TRAF3IP2//NEK6
GO:0030593	neutrophil chemotaxis	Biological process	4	41	493	14742	2.91733	0.0472496	0.516354	1.3256	CCR7//CCL19//ITGB2//TGFB2
GO:0030705	cytoskeleton-dependent intracellular transport	Biological process	4	41	493	14742	2.91733	0.0472496	0.516354	1.3256	KLC2//DST//KIF5B//RAB6A
GO:0006082	organic acid metabolic process	Biological process	37	834	493	14742	1.32662	0.0482152	0.520032	1.31682	ACOX1//PTGS1//PLA2G4F//SLC27A2//ALDH5A1//GPT2//PCK2//GPX1//YARS2//SLC1A3//GFPT2//SHMT2//HMGCL//AFMID//CGA//SLC5A5//HNF4A//ADC//CKM//ACSL5//CROT//CPT1C//ACSM3//ACOT8//FABP6//HPDL//AGXT//PPCS//SLC2A3//ASRGL1//PRPS1//CYP26B1//CYP26C1//CRABP2//PLP1//GHSR//MME
GO:0001817	regulation of cytokine production	Biological process	17	327	493	14742	1.55457	0.048593	0.520032	1.31343	EREG//F2RL1//ADORA2B//ARNT//TGFB2//UBE2L6//CCR7//GHSR//AXL//CCL19//PRKD2//SERPINE1//IGF2BP2//RNF128//INHA//PANX1//NLRP1
GO:0043393	regulation of protein binding	Biological process	6	79	493	14742	2.27109	0.0486498	0.520032	1.31292	BAX//DAB2//MAPK8//VTN//CAPRIN2//NRG1
GO:0032386	regulation of intracellular transport	Biological process	10	164	493	14742	1.82333	0.0489419	0.520032	1.31032	KEAP1//CAMK2D//CRYAA//OGG1//HNF4A//EDA//CCL19//SPHK1//NUDT4//BMP4
GO:0009988	cell-cell recognition	Biological process	3	25	493	14742	3.58832	0.0495673	0.520032	1.3048	CCR7//CCL19//TNP2
GO:0014910	regulation of smooth muscle cell migration	Biological process	3	25	493	14742	3.58832	0.0495673	0.520032	1.3048	VTN//SERPINE1//PLAU
GO:0051966	regulation of synaptic transmission, glutamatergic	Biological process	3	25	493	14742	3.58832	0.0495673	0.520032	1.3048	ADORA1//GRIA4//SHANK3
GO:0061383	trabecula morphogenesis	Biological process	3	25	493	14742	3.58832	0.0495673	0.520032	1.3048	FBN2//RBP4//PLXNB1
GO:0033077	T cell differentiation in thymus	Biological process	5	60	493	14742	2.49189	0.0498019	0.520032	1.30275	BMP4//IL7R//ZAP70//CCR7//TCF3

## Sheet: up-CC
#Column "GO.ID" stands for the ID of gene ontology term
#Column "Term" stands for the name of gene ontology term
#Column "Ontology" stands for the ontology of GOID belongs to
#Column "Count" stands for the number of DE genes associated with the listed GOID
#Column "Pop.Hits" stands for the number of background population genes associated with the listed GOID
#Column "List.Total" stands for the total number of DE genes
#Column "Pop.Total" stands for the total number of background population genes
#Column "Fold.Enrichment" stands for the Fold Enrichment value of the GOID, it equals (Count/Pop.Hits)/(List.Total/Pop.Total)
#Column "Pvalue" stands for the significance testing value of the GOID
#Column "FDR" stands for the false discovery rate of the GOID, using Benjamini & Hochberg (1995) method
#Column "Enrichment.Score" stands for the Enrichment Score value of the GOID, it equals (-log10(Pvalue))
#Column "GENES" stands for the DE genes associated with the GOID
GO.ID	Term	Ontology	Count	Pop.Hits	List.Total	Pop.Total	Fold.Enrichment	Pvalue	FDR	Enrichment.Score	GENES
GO:0000786	nucleosome	Cellular component	13	67	551	16875	5.94238	2.09908e-07	0.000116919	6.67797	TCF3//HIST1H2BD//HIST1H2BB//H3F3B//TNP2//HIST1H2BL//HIST1H2BC//HIST1H2BO//HIST2H2BE//HIST1H3F//HIST1H2AG//HIST2H3D//HIST2H2AA4
GO:0032993	protein-DNA complex	Cellular component	15	106	551	16875	4.33389	1.77061e-06	0.000493114	5.75188	ACD//HIST1H2BD//HIST1H2BB//H3F3B//TNP2//HIST1H2BL//HIST1H2BC//HIST1H2BO//HIST2H2BE//HIST1H3F//HIST1H2AG//HIST2H3D//HIST2H2AA4//TCF3//RPA4
GO:0031982	vesicle	Cellular component	53	876	551	16875	1.85295	1.10315e-05	0.00204818	4.95736	CPA3//PRG2//VGF//SSPN//CRISPLD2//SCAMP4//SYTL4//MME//SYT1//BRSK1//LGI3//GRB2//WAS//HLA-F//DST//PALM//PDPK1//BECN1//ARHGAP30//CLTA//TNK2//FAM109A//C9ORF7//CLIP1//DYSF//PHLDA1//N4BP3//ZDHHC8//NPC1L1//GPRC5B//DAB2//CAMK2D//GRIA4//CACNG2//ANXA3//TAP1//ITPR1//FN1//SERPINE1//PROS1//TGFB2//RAB6A//GBP5//ANXA2//ANXA6//ATP6V1G2//CALU//SDCBP//STX3//KIF5B//SLC12A3//SRI//PLA2G4F
GO:0031988	membrane-bounded vesicle	Cellular component	47	808	551	16875	1.78147	9.18264e-05	0.0127868	4.03703	CPA3//PRG2//VGF//SSPN//CRISPLD2//SCAMP4//SYTL4//MME//SYT1//BRSK1//LGI3//GRB2//WAS//HLA-F//DST//PALM//PDPK1//BECN1//ARHGAP30//CLTA//TNK2//FAM109A//C9ORF7//CLIP1//DYSF//PHLDA1//N4BP3//ZDHHC8//NPC1L1//GPRC5B//DAB2//CAMK2D//GRIA4//CACNG2//ANXA3//TAP1//ITPR1//FN1//SERPINE1//PROS1//TGFB2//ANXA2//ANXA6//ATP6V1G2//CALU//SDCBP//STX3
GO:0016023	cytoplasmic membrane-bounded vesicle	Cellular component	45	789	551	16875	1.74674	0.00020185	0.020432	3.69497	CPA3//PRG2//VGF//SSPN//CRISPLD2//SCAMP4//SYTL4//MME//SYT1//BRSK1//LGI3//HLA-F//CLTA//TNK2//FAM109A//C9ORF7//CLIP1//DYSF//PHLDA1//N4BP3//ZDHHC8//NPC1L1//GPRC5B//DAB2//CAMK2D//GRIA4//CACNG2//ANXA3//TAP1//ITPR1//FN1//SERPINE1//PROS1//TGFB2//ANXA2//ANXA6//ATP6V1G2//CALU//SDCBP//STX3//DST//PALM//PDPK1//BECN1//ARHGAP30
GO:0031410	cytoplasmic vesicle	Cellular component	47	839	551	16875	1.71565	0.000220093	0.020432	3.65739	CPA3//PRG2//VGF//SSPN//CRISPLD2//SCAMP4//SYTL4//MME//SYT1//BRSK1//LGI3//HLA-F//DST//PALM//PDPK1//BECN1//ARHGAP30//CLTA//TNK2//FAM109A//C9ORF7//CLIP1//DYSF//PHLDA1//N4BP3//ZDHHC8//NPC1L1//GPRC5B//DAB2//CAMK2D//GRIA4//CACNG2//ANXA3//TAP1//ITPR1//FN1//SERPINE1//PROS1//TGFB2//ANXA2//ANXA6//ATP6V1G2//CALU//SDCBP//STX3//RAB6A//GBP5
GO:0042641	actomyosin	Cellular component	8	53	551	16875	4.62281	0.000298083	0.0228506	3.52566	DST//MYLK//TPM1//TPM4//MYL9//FERMT2//MYH14//MYO18A
GO:0012506	vesicle membrane	Cellular component	23	318	551	16875	2.2151	0.000328195	0.0228506	3.48387	SYTL4//VGF//HLA-F//CLTA//C9ORF7//CLIP1//DYSF//TNK2//PHLDA1//N4BP3//ZDHHC8//NPC1L1//GPRC5B//DAB2//CAMK2D//GRIA4//SYT1//CACNG2//ANXA3//TAP1//ITPR1//GRB2//WAS
GO:0044433	cytoplasmic vesicle part	Cellular component	25	362	551	16875	2.11506	0.000369464	0.0228657	3.43243	SYTL4//VGF//HLA-F//CLTA//C9ORF7//CLIP1//DYSF//TNK2//PHLDA1//N4BP3//ZDHHC8//NPC1L1//GPRC5B//DAB2//CAMK2D//GRIA4//SYT1//CACNG2//ANXA3//TAP1//ITPR1//FN1//SERPINE1//PROS1//TGFB2
GO:0001725	stress fiber	Cellular component	7	44	551	16875	4.87234	0.000510994	0.0284624	3.29158	DST//MYLK//TPM1//TPM4//MYL9//FERMT2//MYH14
GO:0032432	actin filament bundle	Cellular component	7	46	551	16875	4.6605	0.000674692	0.0341639	3.17089	DST//MYLK//TPM1//TPM4//MYL9//FERMT2//MYH14
GO:0030659	cytoplasmic vesicle membrane	Cellular component	21	306	551	16875	2.10179	0.00114892	0.0533291	2.93971	SYTL4//VGF//HLA-F//CLTA//C9ORF7//DAB2//CAMK2D//GRIA4//SYT1//CACNG2//ANXA3//TAP1//ITPR1//CLIP1//DYSF//TNK2//PHLDA1//N4BP3//ZDHHC8//NPC1L1//GPRC5B
GO:0000785	chromatin	Cellular component	19	280	551	16875	2.0782	0.00220094	0.0943018	2.65739	HIST1H2BD//HIST1H2BB//H3F3B//TNP2//HIST1H2BL//HIST1H2BC//HIST1H2BO//HIST2H2BE//HIST1H3F//HIST1H2AG//HIST2H3D//HIST2H2AA4//TCF3//NPM2//RUNX3//RXRA//H1FNT//MBD3//PSIP1
GO:0030666	endocytic vesicle membrane	Cellular component	8	73	551	16875	3.35629	0.00255966	0.101838	2.59182	CLTA//ANXA3//HLA-F//TAP1//CAMK2D//GRIA4//SYT1//CACNG2
GO:0043005	neuron projection	Cellular component	30	537	551	16875	1.71096	0.00309089	0.114775	2.50992	ADORA1//CHRM1//GRIA4//SPOCK1//SHANK3//ACHE//ANXA3//DST//MAPT//MME//PALM//RXRA//TGFB2//AMIGO1//MYH14//CLCN2//MAX//WFS1//APBB1//PTPRF//STX3//TSC1//EXOC8//EPB41L3//SLC1A3//GHSR//KIF5B//SYT1//VGF//KLC2
GO:0005622	intracellular	Cellular component	425	12155	551	16875	1.07084	0.00336182	0.117033	2.47343	PHF16//PHF20//CLCN5//HLA-F//ABCB1//ABCB4//PROS1//RAB6A//SLC35A2//B3GALT4//GCNT3//B4GALT5//COG5//GNPTAB//SLC35B4//B4GALNT2//TMEM130//EXOC8//PPIL2//FBXL12//SMURF2//PPP2R2B//CLP1//RAD21//CHMP1A//DSN1//TRIP12//CLIP1//SS18L1//ACD//HIST1H2BD//HIST1H2BB//H3F3B//TNP2//HIST1H2BL//HIST1H2BC//HIST1H2BO//HIST2H2BE//HIST1H3F//HIST1H2AG//HIST2H3D//HIST2H2AA4//TCF3//NPM2//RUNX3//RXRA//H1FNT//MBD3//NCAPG//NEK6//…
GO:0042995	cell projection	Cellular component	51	1073	551	16875	1.45567	0.00448308	0.146887	2.34842	GSN//PLCG1//CLIP1//FGD3//INHA//PTGS1//MME//SORD//CEP290//TTLL9//CBY1//TTC8//IFT81//ADORA1//CHRM1//GRIA4//SPOCK1//SHANK3//APBB1//MYLK//TSC1//ACHE//ANXA3//DST//MAPT//PALM//RXRA//TGFB2//AMIGO1//MYH14//CLCN2//MAX//WFS1//PTPRF//STX3//EXOC8//F2RL1//TPM1//PANX1//RASGRP2//SPRY4//PLA2G4F//EPB41L3//KIF5B//KLC2//GHSR//SLC1A3//SYT1//VGF//FZD4//MAGI1
GO:0030133	transport vesicle	Cellular component	10	119	551	16875	2.57362	0.00561091	0.169741	2.25097	SYTL4//HLA-F//CLTA//SYT1//CPA3//PRG2//VGF//SSPN//CRISPLD2//SCAMP4
GO:0044438	microbody part	Cellular component	7	67	551	16875	3.19975	0.00609482	0.169741	2.21504	ACOX1//PEX14//PXMP2//SLC27A2//AGXT//ACOT8//CROT
GO:0044439	peroxisomal part	Cellular component	7	67	551	16875	3.19975	0.00609482	0.169741	2.21504	ACOX1//PEX14//PXMP2//SLC27A2//AGXT//ACOT8//CROT
GO:0044422	organelle part	Cellular component	224	6001	551	16875	1.14319	0.00667146	0.176953	2.17578	PHF16//PHF20//CLCN5//HLA-F//ABCB1//ABCB4//PROS1//RAB6A//SLC35A2//B3GALT4//GCNT3//B4GALT5//COG5//GNPTAB//SLC35B4//B4GALNT2//TMEM130//CLP1//RAD21//CHMP1A//DSN1//CLIP1//SS18L1//ACD//HIST1H2BD//HIST1H2BB//H3F3B//TNP2//HIST1H2BL//HIST1H2BC//HIST1H2BO//HIST2H2BE//HIST1H3F//HIST1H2AG//HIST2H3D//HIST2H2AA4//TCF3//NPM2//RUNX3//RXRA//H1FNT//MBD3//NCAPG//NEK6//TUBGCP5//CEP290//DST//KRT34//TLK2//MYLK//TPM1//…
GO:0044427	chromosomal part	Cellular component	27	503	551	16875	1.64395	0.00813606	0.20599	2.08959	DSN1//RAD21//CLIP1//SS18L1//ACD//HIST1H2BD//HIST1H2BB//H3F3B//TNP2//HIST1H2BL//HIST1H2BC//HIST1H2BO//HIST2H2BE//HIST1H3F//HIST1H2AG//HIST2H3D//HIST2H2AA4//TCF3//NPM2//RUNX3//RXRA//H1FNT//MBD3//NCAPG//RPA4//PSIP1//NSMCE4A
GO:0005777	peroxisome	Cellular component	9	109	551	16875	2.52876	0.00937379	0.21755	2.02808	ACOX1//PEX14//PXMP2//SLC27A2//AGXT//ACOT8//CROT//HMGCL//KIAA0430
GO:0042579	microbody	Cellular component	9	109	551	16875	2.52876	0.00937379	0.21755	2.02808	ACOX1//AGXT//HMGCL//PEX14//PXMP2//KIAA0430//ACOT8//SLC27A2//CROT
GO:0031012	extracellular matrix	Cellular component	23	417	551	16875	1.68921	0.0103235	0.224884	1.98617	FBN2//COL4A6//COL9A2//COL12A1//EDA//CCBE1//BMP4//ECM1//EFEMP1//FN1//SPOCK1//VTN//WNT5B//PRSS36//ANXA2//DST//LAMA4//ACHE//ADAMTSL4//SLC1A3//SERPINE1//TGFB2//LMCD1
GO:0030017	sarcomere	Cellular component	9	111	551	16875	2.4832	0.0104973	0.224884	1.97892	TPM1//TPM4//DST//CAPN3//SRI//TCAP//MYL9//MYL2//SYNE1
GO:0030424	axon	Cellular component	15	237	551	16875	1.93836	0.0112988	0.233091	1.94697	ADORA1//DST//SPOCK1//EPB41L3//GRIA4//CHRM1//ACHE//ANXA3//MAPT//MME//PALM//RXRA//TGFB2//AMIGO1//MYH14
GO:0044446	intracellular organelle part	Cellular component	219	5923	551	16875	1.13239	0.0118403	0.235122	1.92664	PHF16//PHF20//CLCN5//HLA-F//ABCB1//ABCB4//PROS1//RAB6A//SLC35A2//B3GALT4//GCNT3//B4GALT5//COG5//GNPTAB//SLC35B4//B4GALNT2//TMEM130//CLP1//RAD21//CHMP1A//DSN1//CLIP1//SS18L1//ACD//HIST1H2BD//HIST1H2BB//H3F3B//TNP2//HIST1H2BL//HIST1H2BC//HIST1H2BO//HIST2H2BE//HIST1H3F//HIST1H2AG//HIST2H3D//HIST2H2AA4//TCF3//NPM2//RUNX3//RXRA//H1FNT//MBD3//NCAPG//NEK6//TUBGCP5//CEP290//DST//KRT34//TLK2//MYLK//TPM1//…
GO:0016607	nuclear speck	Cellular component	10	134	551	16875	2.28553	0.0125142	0.235122	1.9026	APBB1//DYRK1A//OGG1//PRPF18//SMNDC1//NEK6//RNPS1//CBY1//ZC3H14//C1ORF124
GO:0005578	proteinaceous extracellular matrix	Cellular component	20	354	551	16875	1.73029	0.0126637	0.235122	1.89744	FBN2//COL4A6//COL9A2//COL12A1//EDA//CCBE1//ANXA2//DST//LAMA4//ACHE//ADAMTSL4//SLC1A3//BMP4//ECM1//EFEMP1//FN1//SPOCK1//VTN//WNT5B//PRSS36
GO:0030426	growth cone	Cellular component	7	78	551	16875	2.7485	0.0136536	0.245324	1.86475	APBB1//MAPT//PTPRF//STX3//TSC1//MYH14//EXOC8
GO:0030427	site of polarized growth	Cellular component	7	79	551	16875	2.71371	0.0145734	0.253668	1.83644	APBB1//MAPT//PTPRF//STX3//TSC1//MYH14//EXOC8
GO:0005782	peroxisomal matrix	Cellular component	4	30	551	16875	4.08348	0.015715	0.257448	1.80369	ACOX1//AGXT//ACOT8//CROT
GO:0031907	microbody lumen	Cellular component	4	30	551	16875	4.08348	0.015715	0.257448	1.80369	ACOX1//AGXT//ACOT8//CROT
GO:0044463	cell projection part	Cellular component	28	559	551	16875	1.53405	0.0168309	0.267853	1.77389	CBY1//CEP290//TTC8//TTLL9//ADORA1//CHRM1//GRIA4//SPOCK1//SHANK3//APBB1//MAPT//PTPRF//STX3//TSC1//MYH14//EXOC8//IFT81//PALM//TPM1//RASGRP2//SPRY4//PLA2G4F//DST//EPB41L3//KIF5B//KLC2//SLC1A3//MME
GO:0044449	contractile fiber part	Cellular component	9	124	551	16875	2.22286	0.0204143	0.315854	1.69007	MYL9//TPM1//TPM4//MYL2//SYNE1//DST//CAPN3//SRI//TCAP
GO:0044424	intracellular part	Cellular component	409	11860	551	16875	1.05616	0.0209825	0.315872	1.67814	PHF16//PHF20//CLCN5//HLA-F//ABCB1//ABCB4//PROS1//RAB6A//SLC35A2//B3GALT4//GCNT3//B4GALT5//COG5//GNPTAB//SLC35B4//B4GALNT2//TMEM130//EXOC8//PPIL2//FBXL12//SMURF2//PPP2R2B//CLP1//RAD21//CHMP1A//DSN1//TRIP12//CLIP1//SS18L1//ACD//HIST1H2BD//HIST1H2BB//H3F3B//TNP2//HIST1H2BL//HIST1H2BC//HIST1H2BO//HIST2H2BE//HIST1H3F//HIST1H2AG//HIST2H3D//HIST2H2AA4//TCF3//NPM2//RUNX3//RXRA//H1FNT//MBD3//NCAPG//NEK6//…
GO:0005694	chromosome	Cellular component	29	597	551	16875	1.4877	0.0219126	0.321193	1.65931	RAD21//CHMP1A//DSN1//CLIP1//SS18L1//ACD//HIST1H2BD//HIST1H2BB//H3F3B//TNP2//HIST1H2BL//HIST1H2BC//HIST1H2BO//HIST2H2BE//HIST1H3F//HIST1H2AG//HIST2H3D//HIST2H2AA4//TCF3//NPM2//RUNX3//RXRA//H1FNT//MBD3//NCAPG//RPA4//PSIP1//NSMCE4A//MPHOSPH10
GO:0030016	myofibril	Cellular component	9	131	551	16875	2.10409	0.0279341	0.388973	1.55387	TPM1//TPM4//MYL2//SYNE1//DST//CAPN3//SRI//TCAP//MYL9
GO:0005640	nuclear outer membrane	Cellular component	3	21	551	16875	4.37516	0.0297348	0.388973	1.52674	RAE1//SYNE1//RETSAT
GO:0044459	plasma membrane part	Cellular component	81	2024	551	16875	1.22565	0.0298303	0.388973	1.52534	FCGRT//HLA-F//PROCR//MDGA1//RTN4RL2//ADORA1//ADORA2B//AXL//CD33//CHRM1//CHRNB1//CLCN5//EDA//EMR1//EREG//F2RL1//GP1BA//GYPE//HTR1D//MFI2//MME//OLR1//P2RY11//PALM//ABCB4//PLXNB1//PTPRD//PTPRF//SLC12A3//TPBG//SSPN//FZD4//TNFRSF25//CD164//CCRL2//CLDN1//RAPGEF2//CLEC2B//TMEM5//ITGB2//CACNG2//CACNG6//SDCBP//GJA10//MAGI1//WNK4//PARD3B//DST//PDPK1//KEAP1//FERMT2//KCNJ1//KCNU1//KCTD6//CCR7//IL7R//MCAM//UT…
GO:0001726	ruffle	Cellular component	8	112	551	16875	2.18758	0.0303432	0.388973	1.51794	TPM1//RASGRP2//SPRY4//PLA2G4F//GSN//PLCG1//CLIP1//FGD3
GO:0005737	cytoplasm	Cellular component	308	8759	551	16875	1.07693	0.0310192	0.388973	1.50837	CLCN5//HLA-F//ABCB1//ABCB4//PROS1//RAB6A//SLC35A2//B3GALT4//GCNT3//B4GALT5//COG5//GNPTAB//SLC35B4//B4GALNT2//TMEM130//EXOC8//NPM2//CEP290//CD164//AP3M1//ACOX1//AGXT//ALAS2//BAX//IFI6//GPX1//HMGCL//MUTYH//OGG1//PCK2//PPOX//PPP2R2B//MAPK8//PXMP2//ACSM3//SDHC//SHMT2//SORD//TAP1//ALDH5A1//RDBP//EXOG//ACOT8//TIMM17B//SLC27A2//TDRKH//CHMP2B//KIAA1279//GTPBP5//BBC3//DNAJC15//MRPS18C//YARS2//ACSL5//RSAD1…
GO:0031594	neuromuscular junction	Cellular component	4	37	551	16875	3.31093	0.0317059	0.388973	1.49886	ACHE//CAMK2D//SPOCK1//UTRN
GO:0044420	extracellular matrix part	Cellular component	11	178	551	16875	1.89263	0.032077	0.388973	1.49381	FBN2//COL4A6//COL9A2//COL12A1//EDA//CCBE1//ANXA2//DST//LAMA4//ACHE//SLC1A3
GO:0044464	cell part	Cellular component	484	14351	551	16875	1.03289	0.03254	0.388973	1.48758	ABR//ACHE//ADORA1//ADORA2B//ANXA2//ANXA3//APBB1//AXL//CAMK2D//CAPN3//CD33//CHRM1//CHRNB1//CLCN5//CLTA//CCR7//DAB2//EDA//EMR1//EPB41L1//EREG//F2RL1//FCGRT//FLT3LG//FYN//GHSR//GIPR//GP1BA//GRIA4//GYPE//HDLBP//NRG1//HLA-F//HTR1D//IL7R//ITGB2//KCNJ1//KLKB1//LY6H//MAPT//MCAM//MFI2//MME//OLR1//P2RY11//SERPINE1//PALM//PDPK1//ABCB1//ABCB4//PLAU//PLCG1//PLXNB1//PPP3CB//PRKCB//PTGS1//PTPRF//RAC2//RAP1B//RR…
GO:0005623	cell	Cellular component	484	14352	551	16875	1.03282	0.0328218	0.388973	1.48384	ABR//ACHE//ADORA1//ADORA2B//ANXA2//ANXA3//APBB1//AXL//CAMK2D//CAPN3//CD33//CHRM1//CHRNB1//CLCN5//CLTA//CCR7//DAB2//EDA//EMR1//EPB41L1//EREG//F2RL1//FCGRT//FLT3LG//FYN//GHSR//GIPR//GP1BA//GRIA4//GYPE//HDLBP//NRG1//HLA-F//HTR1D//IL7R//ITGB2//KCNJ1//KLKB1//LY6H//MAPT//MCAM//MFI2//MME//OLR1//P2RY11//SERPINE1//PALM//PDPK1//ABCB1//ABCB4//PLAU//PLCG1//PLXNB1//PPP3CB//PRKCB//PTGS1//PTPRF//RAC2//RAP1B//RR…
GO:0042612	MHC class I protein complex	Cellular component	3	22	551	16875	4.17629	0.0336167	0.390094	1.47345	FCGRT//HLA-F//PROCR
GO:0032991	macromolecular complex	Cellular component	138	3692	551	16875	1.14475	0.0394147	0.424412	1.40434	PHF16//PHF20//EXOC8//PPIL2//FBXL12//SMURF2//PPP2R2B//CLP1//DSN1//TRIP12//CLIP1//SS18L1//ACD//HIST1H2BD//HIST1H2BB//H3F3B//TNP2//HIST1H2BL//HIST1H2BC//HIST1H2BO//HIST2H2BE//HIST1H3F//HIST1H2AG//HIST2H3D//HIST2H2AA4//TCF3//NCAPG//CEP290//DST//KRT34//TLK2//PLXNB1//LSM10//GEMIN4//FCGRT//HLA-F//PROCR//MRPS18C//RPS6KL1//MRPL55//FN1//LAMA4//ITGB2//RAE1//RPP38//POP5//RPA4//POLR2D//ARNT//FOXL1//HNF4A//PBX…
GO:0043292	contractile fiber	Cellular component	9	140	551	16875	1.96882	0.0402141	0.424412	1.39562	MYL9//TPM1//TPM4//CAPN3//MYL2//SYNE1//DST//SRI//TCAP
GO:0030934	anchoring collagen	Cellular component	2	10	551	16875	6.12523	0.0402544	0.424412	1.39519	COL9A2//COL12A1
GO:0042581	specific granule	Cellular component	2	10	551	16875	6.12523	0.0402544	0.424412	1.39519	ANXA3//STX3
GO:0031252	cell leading edge	Cellular component	13	231	551	16875	1.72355	0.0403839	0.424412	1.39379	GSN//PLCG1//CLIP1//FGD3//APBB1//MYLK//TSC1//ADORA1//TPM1//RASGRP2//SPRY4//PLA2G4F//DST
GO:0030018	Z disc	Cellular component	5	59	551	16875	2.59544	0.0430944	0.436903	1.36558	DST//CAPN3//SRI//TCAP//MYL9
GO:0043226	organelle	Cellular component	354	10236	551	16875	1.05917	0.0431413	0.436903	1.36511	PHF16//PHF20//CLCN5//HLA-F//ABCB1//ABCB4//PROS1//RAB6A//SLC35A2//B3GALT4//GCNT3//B4GALT5//COG5//GNPTAB//SLC35B4//B4GALNT2//TMEM130//CLP1//RAD21//CHMP1A//DSN1//CLIP1//SS18L1//ACD//HIST1H2BD//HIST1H2BB//H3F3B//TNP2//HIST1H2BL//HIST1H2BC//HIST1H2BO//HIST2H2BE//HIST1H3F//HIST1H2AG//HIST2H3D//HIST2H2AA4//TCF3//NPM2//RUNX3//RXRA//H1FNT//MBD3//NCAPG//NEK6//TUBGCP5//CEP290//SPRR2F//DST//KRT34//TLK2//MYLK…
GO:0043229	intracellular organelle	Cellular component	353	10221	551	16875	1.05773	0.0475704	0.47058	1.32266	PHF16//PHF20//CLCN5//HLA-F//ABCB1//ABCB4//PROS1//RAB6A//SLC35A2//B3GALT4//GCNT3//B4GALT5//COG5//GNPTAB//SLC35B4//B4GALNT2//TMEM130//CLP1//RAD21//CHMP1A//DSN1//CLIP1//SS18L1//ACD//HIST1H2BD//HIST1H2BB//H3F3B//TNP2//HIST1H2BL//HIST1H2BC//HIST1H2BO//HIST2H2BE//HIST1H3F//HIST1H2AG//HIST2H3D//HIST2H2AA4//TCF3//NPM2//RUNX3//RXRA//H1FNT//MBD3//NCAPG//NEK6//TUBGCP5//CEP290//SPRR2F//DST//KRT34//TLK2//MYLK…
GO:0043205	fibril	Cellular component	2	11	551	16875	5.56839	0.0481563	0.47058	1.31735	FBN2//SLC1A3

## Sheet: up-MF
#Column "GO.ID" stands for the ID of gene ontology term
#Column "Term" stands for the name of gene ontology term
#Column "Ontology" stands for the ontology of GOID belongs to
#Column "Count" stands for the number of DE genes associated with the listed GOID
#Column "Pop.Hits" stands for the number of background population genes associated with the listed GOID
#Column "List.Total" stands for the total number of DE genes
#Column "Pop.Total" stands for the total number of background population genes
#Column "Fold.Enrichment" stands for the Fold Enrichment value of the GOID, it equals (Count/Pop.Hits)/(List.Total/Pop.Total)
#Column "Pvalue" stands for the significance testing value of the GOID
#Column "FDR" stands for the false discovery rate of the GOID, using Benjamini & Hochberg (1995) method
#Column "Enrichment.Score" stands for the Enrichment Score value of the GOID, it equals (-log10(Pvalue))
#Column "GENES" stands for the DE genes associated with the GOID
GO.ID	Term	Ontology	Count	Pop.Hits	List.Total	Pop.Total	Fold.Enrichment	Pvalue	FDR	Enrichment.Score	GENES
GO:0005488	binding	Molecular function	424	11840	510	15325	1.07608	0.000552649	0.515069	3.25755	CRYAA//DNAJA4//DNAJC12//DNAJC18//YARS2//HMGCL//HNF4A//AXL//CAMK2D//CKM//CLCN5//DDX10//DYRK1A//FYN//GTF2F2//KCNJ1//KIF5B//MX2//MYLK//PDPK1//ABCB1//ABCB4//POLR2D//PPOX//PRKCB//MAPK8//PRKY//PRPS1//RAB6A//RAC2//RAP1B//RRAD//RTKN//ACSM3//STK4//STK10//TAP1//TEC//TUBB2A//UBE2G2//ZAP70//RDBP//RTCD1//DDX3Y//SPHK1//MAGI1//RECQL5//KIAA0430//TNK2//UBE2E3//IGF2BP2//NEK6//SRCAP//RNPS1//CLP1//SLC27A2//TLK2//STK…
GO:0008307	structural constituent of muscle	Molecular function	6	45	510	15325	4.00654	0.00356893	0.767353	2.44746	CAPN3//MYL2//TPM1//TPM4//TCAP//MYL9
GO:0016634	oxidoreductase activity, acting on the CH-CH group of donors, oxygen as acceptor	Molecular function	3	10	510	15325	9.01471	0.00369151	0.767353	2.4328	ACOX1//RSAD1//PPOX
GO:0005515	protein binding	Molecular function	254	6731	510	15325	1.13393	0.00380437	0.767353	2.41972	CRYAA//DNAJA4//DNAJC12//DNAJC18//ACHE//APBB1//TGFB2//ADORA1//RLN3//GRB2//FYN//ITGB2//SDCBP//F2RL1//PLEKHA2//ECM1//SERPINE1//ADAMTSL4//SYNE1//PRKCB//NPM2//TSC1//BAG5//DST//EPB41L1//GSN//MYLK//TAGLN//TPM1//TPM4//UTRN//EPB41L3//MYO5C//MYH14//MYL2//EDA//FLT3LG//NRG1//HNF4A//INHA//LAMA4//PSPN//SRI//PANX1//CAPRIN2//WNT5B//FIBCD1//TAC4//BMP4//IL11//GDF15//EREG//EFEMP1//PDPK1//PTPRF//PLCG1//SYTL4//VTN//A…
GO:0000287	magnesium ion binding	Molecular function	13	176	510	15325	2.21953	0.00605398	0.767353	2.21796	HMGCL//PPM1B//PRPS1//PRPSAP1//STK4//SPHK1//NEK6//STK38//GTPBP5//STK36//NUAK2//BRSK1//RNASEH1
GO:0005544	calcium-dependent phospholipid binding	Molecular function	4	24	510	15325	5.00817	0.00758618	0.767353	2.11998	ANXA2//ANXA3//ANXA6//DYSF
GO:0046983	protein dimerization activity	Molecular function	37	734	510	15325	1.51473	0.00790605	0.767353	2.10204	ACHE//AGXT//BAX//DST//RUNX1//CRYBA2//FLT3LG//HMGCL//HNF4A//MAX//PRPS1//RENBP//CLIP1//SDCBP//STK4//STK10//TAP1//TCF3//TGFB2//TPD52L2//ALDH5A1//FZD4//RAB11FIP2//YARS2//PLEKHB1//FAM109A//RNASEH1//ADORA1//ARNT//AXL//INHA//PPP3CB//RXRA//SIM2//PANX1//BTRC//CREB3L1
GO:0001972	retinoic acid binding	Molecular function	3	13	510	15325	6.93439	0.00816756	0.767353	2.08791	CRABP2//CYP26B1//CYP26C1
GO:0015645	fatty acid ligase activity	Molecular function	3	14	510	15325	6.43908	0.0101415	0.767353	1.9939	SLC27A2//ACSL5//ACSM3
GO:0042803	protein homodimerization activity	Molecular function	27	504	510	15325	1.60977	0.0104418	0.767353	1.98122	ACHE//AGXT//BAX//DST//RUNX1//CRYBA2//FLT3LG//HMGCL//HNF4A//MAX//PRPS1//RENBP//CLIP1//SDCBP//STK4//STK10//TAP1//TCF3//TGFB2//TPD52L2//ALDH5A1//FZD4//RAB11FIP2//YARS2//PLEKHB1//FAM109A//RNASEH1
GO:0004672	protein kinase activity	Molecular function	32	628	510	15325	1.53116	0.011248	0.767353	1.94892	KCNH5//DYRK1A//PDPK1//MAPK8//PRKY//STK4//STK10//TNK2//NEK6//TLK2//STK38//PRKD2//STK36//WNK4//NUAK2//RPS6KL1//RIOK1//BRSK1//TAF1L//CAMK2D//CAMKK1//MYLK//PRKCB//TGFB2//FYN//PLCG1//ZAP70//AXL//TEC//EFEMP1//POLR2D//PAN3
GO:0005501	retinoid binding	Molecular function	4	27	510	15325	4.45171	0.011585	0.767353	1.93611	CRABP2//CYP26B1//CYP26C1//RBP4
GO:0015144	carbohydrate transmembrane transporter activity	Molecular function	4	27	510	15325	4.45171	0.011585	0.767353	1.93611	SLC35A2//SLC2A3//SLC2A14//SLC35B4
GO:0016301	kinase activity	Molecular function	39	813	510	15325	1.44147	0.013921	0.767353	1.85633	KCNH5//CKM//SPHK1//ETNK2//DAK//DYRK1A//POLR2D//PRKD2//PAN3//PDPK1//MAPK8//PRKY//STK4//STK10//TNK2//NEK6//TLK2//STK38//STK36//WNK4//NUAK2//RPS6KL1//RIOK1//BRSK1//TAF1L//CAMK2D//CAMKK1//MYLK//PRKCB//TGFB2//FYN//PLCG1//ZAP70//AXL//TEC//EFEMP1//CLP1//PRPS1//ZMYND8
GO:0019840	isoprenoid binding	Molecular function	4	29	510	15325	4.14469	0.0148827	0.767353	1.82732	CRABP2//CYP26B1//CYP26C1//RBP4
GO:0016773	phosphotransferase activity, alcohol group as acceptor	Molecular function	36	746	510	15325	1.45009	0.0163251	0.767353	1.78714	KCNH5//SPHK1//ETNK2//DAK//DYRK1A//POLR2D//PRKD2//PAN3//PDPK1//MAPK8//PRKY//STK4//STK10//TNK2//NEK6//TLK2//STK38//STK36//WNK4//NUAK2//RPS6KL1//RIOK1//BRSK1//TAF1L//CAMK2D//CAMKK1//MYLK//PRKCB//TGFB2//FYN//PLCG1//ZAP70//AXL//TEC//EFEMP1//CLP1
GO:0008092	cytoskeletal protein binding	Molecular function	29	572	510	15325	1.52346	0.0163354	0.767353	1.78687	DST//EPB41L1//GSN//MYLK//TAGLN//TPM1//TPM4//UTRN//EPB41L3//SYNE1//MYO5C//MYH14//MYL2//KIF5B//MAPT//CLIP1//RAE1//TUBGCP5//SDCBP//NEK6//KIAA1279//KLC2//CAPN3//TCAP//NPC1L1//BRSK1//MAGI1//ANXA2//FARP2
GO:0046982	protein heterodimerization activity	Molecular function	16	266	510	15325	1.80746	0.0166438	0.767353	1.77875	ADORA1//ARNT//AXL//BAX//RUNX1//INHA//MAX//PPP3CB//RXRA//SDCBP//SIM2//TAP1//TCF3//TGFB2//FZD4//PANX1
GO:0005201	extracellular matrix structural constituent	Molecular function	7	80	510	15325	2.62929	0.0170469	0.767353	1.76835	COL9A2//COL12A1//TUFT1//COL4A6//FBN2//FN1//LAMA4
GO:0016769	transferase activity, transferring nitrogenous groups	Molecular function	4	31	510	15325	3.87729	0.0187184	0.767353	1.72773	GPT2//GFPT2//AGXT//ALAS2
GO:0004715	non-membrane spanning protein tyrosine kinase activity	Molecular function	5	47	510	15325	3.1967	0.0194522	0.767353	1.71103	DYRK1A//FYN//TEC//ZAP70//TNK2
GO:0005102	receptor binding	Molecular function	49	1093	510	15325	1.34712	0.0201035	0.767353	1.69673	ADORA1//RLN3//NRG1//FYN//GRB2//SDCBP//WNT5B//TGFB2//BMP4//FLT3LG//IL11//INHA//GDF15//EREG//EFEMP1//PDPK1//PTPRF//EDA//PLCG1//DST//VTN//ADAM22//CGA//STC2//ADM2//VGF//CCL19//FGF13//PSPN//TRIP12//ARNT//PLXNB1//SEMA6B//PALM//SHANK3//TAP1//CCRL2//RXRA//PRKCB//SYT1//F2RL1//HNF4A//LAMA4//SERPINE1//SRI//PANX1//CAPRIN2//FIBCD1//TAC4
GO:0019894	kinesin binding	Molecular function	3	18	510	15325	5.00817	0.0206051	0.767353	1.68603	NEK6//KIAA1279//KLC2
GO:0033293	monocarboxylic acid binding	Molecular function	6	65	510	15325	2.77376	0.0207939	0.767353	1.68206	HMGCL//HNF4A//CRABP2//CYP26B1//CYP26C1//STX3
GO:0008083	growth factor activity	Molecular function	11	164	510	15325	2.01548	0.0213575	0.767353	1.67045	BMP4//EREG//EFEMP1//FGF13//NRG1//IL11//INHA//PSPN//TGFB2//VGF//GDF15
GO:0004674	protein serine/threonine kinase activity	Molecular function	23	441	510	15325	1.56718	0.0227796	0.767353	1.64245	PDPK1//CAMK2D//CAMKK1//MYLK//PRKCB//PRKD2//TGFB2//MAPK8//STK10//DYRK1A//PRKY//STK4//TNK2//NEK6//TLK2//STK38//STK36//WNK4//NUAK2//RPS6KL1//RIOK1//BRSK1//TAF1L
GO:0050840	extracellular matrix binding	Molecular function	4	33	510	15325	3.64231	0.023114	0.767353	1.63612	ACHE//ECM1//PLEKHA2//VTN
GO:0005154	epidermal growth factor receptor binding	Molecular function	3	19	510	15325	4.74458	0.0238769	0.767353	1.62202	EREG//EFEMP1//GRB2
GO:0043236	laminin binding	Molecular function	3	19	510	15325	4.74458	0.0238769	0.767353	1.62202	ACHE//ECM1//PLEKHA2
GO:0016874	ligase activity	Molecular function	24	473	510	15325	1.52469	0.0270446	0.840186	1.56792	RTCD1//SLC27A2//ACSL5//PPCS//LRRC47//YARS2//TTLL1//TTLL9//UBE2G2//BTRC//UBE2L6//TRIP12//HUWE1//UBE2E3//PPIL2//HERC4//SMURF2//BIRC7//RNF128//ACSM3//MID1//MKRN1//RNF138//RNF43
GO:0008483	transaminase activity	Molecular function	3	21	510	15325	4.29272	0.0312108	0.906877	1.5057	GPT2//GFPT2//AGXT
GO:0008289	lipid binding	Molecular function	24	482	510	15325	1.49622	0.0327076	0.906877	1.48535	HMGCL//HNF4A//CRABP2//CYP26B1//CYP26C1//RXRA//SYT1//SYTL4//ANXA2//ANXA3//ANXA6//DYSF//PLEKHA2//RBP4//RAPGEF2//RASGRP2//ZFYVE26//ITPR1//STX3//BAX//FABP6//HDLBP//PTGS1//TEC
GO:0016627	oxidoreductase activity, acting on the CH-CH group of donors	Molecular function	5	54	510	15325	2.78232	0.0332544	0.906877	1.47815	SDHC//ACOX1//RSAD1//PPOX//RETSAT
GO:0031406	carboxylic acid binding	Molecular function	11	176	510	15325	1.87806	0.0335454	0.906877	1.47437	HMGCL//HNF4A//CRABP2//CYP26B1//CYP26C1//ALAS2//SLC1A3//AGXT//SHMT2//STX3//YARS2
GO:0005524	ATP binding	Molecular function	62	1486	510	15325	1.25373	0.0364377	0.906877	1.43845	AXL//CAMK2D//RUNX1//RUNX3//CKM//CLCN5//DDX10//DYRK1A//FYN//GTF2F2//KCNJ1//KIF5B//MYLK//PDPK1//ABCB1//ABCB4//PRKCB//MAPK8//PRKY//PRPS1//RENBP//ACSM3//STK4//STK10//TAP1//TEC//UBE2G2//ZAP70//RTCD1//DDX3Y//SPHK1//MAGI1//RECQL5//TNK2//UBE2E3//NEK6//SRCAP//CLP1//SLC27A2//TLK2//STK38//NLRP1//TTLL1//PRKD2//DAK//STK36//YARS2//ACSL5//ETNK2//DNAJA4//MYO5C//WNK4//MYH14//NUAK2//RPS6KL1//RIOK1//CAMKK1//BRSK1//…
GO:0001540	beta-amyloid binding	Molecular function	3	23	510	15325	3.91944	0.0395869	0.906877	1.40245	ACHE//APBB1//TGFB2
GO:0051119	sugar transmembrane transporter activity	Molecular function	3	23	510	15325	3.91944	0.0395869	0.906877	1.40245	SLC35A2//SLC2A3//SLC2A14
GO:0005516	calmodulin binding	Molecular function	10	159	510	15325	1.88988	0.040017	0.906877	1.39776	CAMK2D//MYLK//PPP3CB//RRAD//SYT1//SPHK1//KCNH5//MYO5C//MYH14//CAMKK1
GO:0004526	ribonuclease P activity	Molecular function	2	10	510	15325	6.0098	0.0416723	0.906877	1.38015	RPP38//POP5
GO:0031432	titin binding	Molecular function	2	10	510	15325	6.0098	0.0416723	0.906877	1.38015	CAPN3//TCAP
GO:0035639	purine ribonucleoside triphosphate binding	Molecular function	74	1829	510	15325	1.21576	0.0423397	0.906877	1.37325	AXL//CAMK2D//RUNX1//RUNX3//CKM//CLCN5//DDX10//DYRK1A//FYN//GTF2F2//KCNJ1//KIF5B//MYLK//PDPK1//ABCB1//ABCB4//PRKCB//MAPK8//PRKY//PRPS1//RENBP//ACSM3//STK4//STK10//TAP1//TEC//UBE2G2//ZAP70//RTCD1//DDX3Y//SPHK1//MAGI1//RECQL5//TNK2//UBE2E3//NEK6//SRCAP//CLP1//SLC27A2//TLK2//STK38//NLRP1//TTLL1//PRKD2//DAK//STK36//YARS2//ACSL5//ETNK2//DNAJA4//MYO5C//WNK4//MYH14//NUAK2//RPS6KL1//RIOK1//CAMKK1//BRSK1//…
GO:0003730	mRNA 3'-UTR binding	Molecular function	3	24	510	15325	3.75613	0.0441585	0.906877	1.35499	IGF2BP2//RNPS1//RBM24
GO:0046875	ephrin receptor binding	Molecular function	3	24	510	15325	3.75613	0.0441585	0.906877	1.35499	FYN//GRB2//SDCBP
GO:0004519	endonuclease activity	Molecular function	7	99	510	15325	2.12468	0.0470452	0.906877	1.32748	DCLRE1C//RNASEH1//RPP38//POP5//MUTYH//OGG1//EXOG
GO:0016772	transferase activity, transferring phosphorus-containing groups	Molecular function	41	942	510	15325	1.30787	0.0471631	0.906877	1.3264	KCNH5//POLR2D//GNPTAB//CKM//SPHK1//ETNK2//DAK//DYRK1A//PRKD2//PAN3//PDPK1//MAPK8//PRKY//STK4//STK10//TNK2//NEK6//TLK2//STK38//STK36//WNK4//NUAK2//RPS6KL1//RIOK1//BRSK1//TAF1L//CAMK2D//CAMKK1//MYLK//PRKCB//TGFB2//FYN//PLCG1//ZAP70//AXL//TEC//PRPS1//PRPSAP1//EFEMP1//CLP1//ZMYND8
GO:0032559	adenyl ribonucleotide binding	Molecular function	62	1511	510	15325	1.23298	0.0481675	0.906877	1.31725	AXL//CAMK2D//RUNX1//RUNX3//CKM//CLCN5//DDX10//DYRK1A//FYN//GTF2F2//KCNJ1//KIF5B//MYLK//PDPK1//ABCB1//ABCB4//PRKCB//MAPK8//PRKY//PRPS1//RENBP//ACSM3//STK4//STK10//TAP1//TEC//UBE2G2//ZAP70//RTCD1//DDX3Y//SPHK1//MAGI1//RECQL5//TNK2//UBE2E3//NEK6//SRCAP//CLP1//SLC27A2//TLK2//STK38//NLRP1//TTLL1//PRKD2//DAK//STK36//YARS2//ACSL5//ETNK2//DNAJA4//MYO5C//WNK4//MYH14//NUAK2//RPS6KL1//RIOK1//CAMKK1//BRSK1//…
GO:0016861	intramolecular oxidoreductase activity, interconverting aldoses and ketoses	Molecular function	2	11	510	15325	5.46346	0.0498325	0.906877	1.30249	GNPDA1//RENBP
GO:0019841	retinol binding	Molecular function	2	11	510	15325	5.46346	0.0498325	0.906877	1.30249	CRABP2//RBP4
GO:0051010	microtubule plus-end binding	Molecular function	2	11	510	15325	5.46346	0.0498325	0.906877	1.30249	DST//CLIP1
